# Supplementary material for: S-Alkylated quinazolin-4(3H)-ones as dual EGFR/VEGFR-2 kinases inhibitors: design, synthesis, anticancer evaluation and docking study
Source: PubMed Central journal article supplement — RSC Adv. 2024 Aug 20;14(36):26325–39. doi: 10.1039/d4ra04828h (PMC11333997; doi:10.1039/d4ra04828h), 2024-08-20

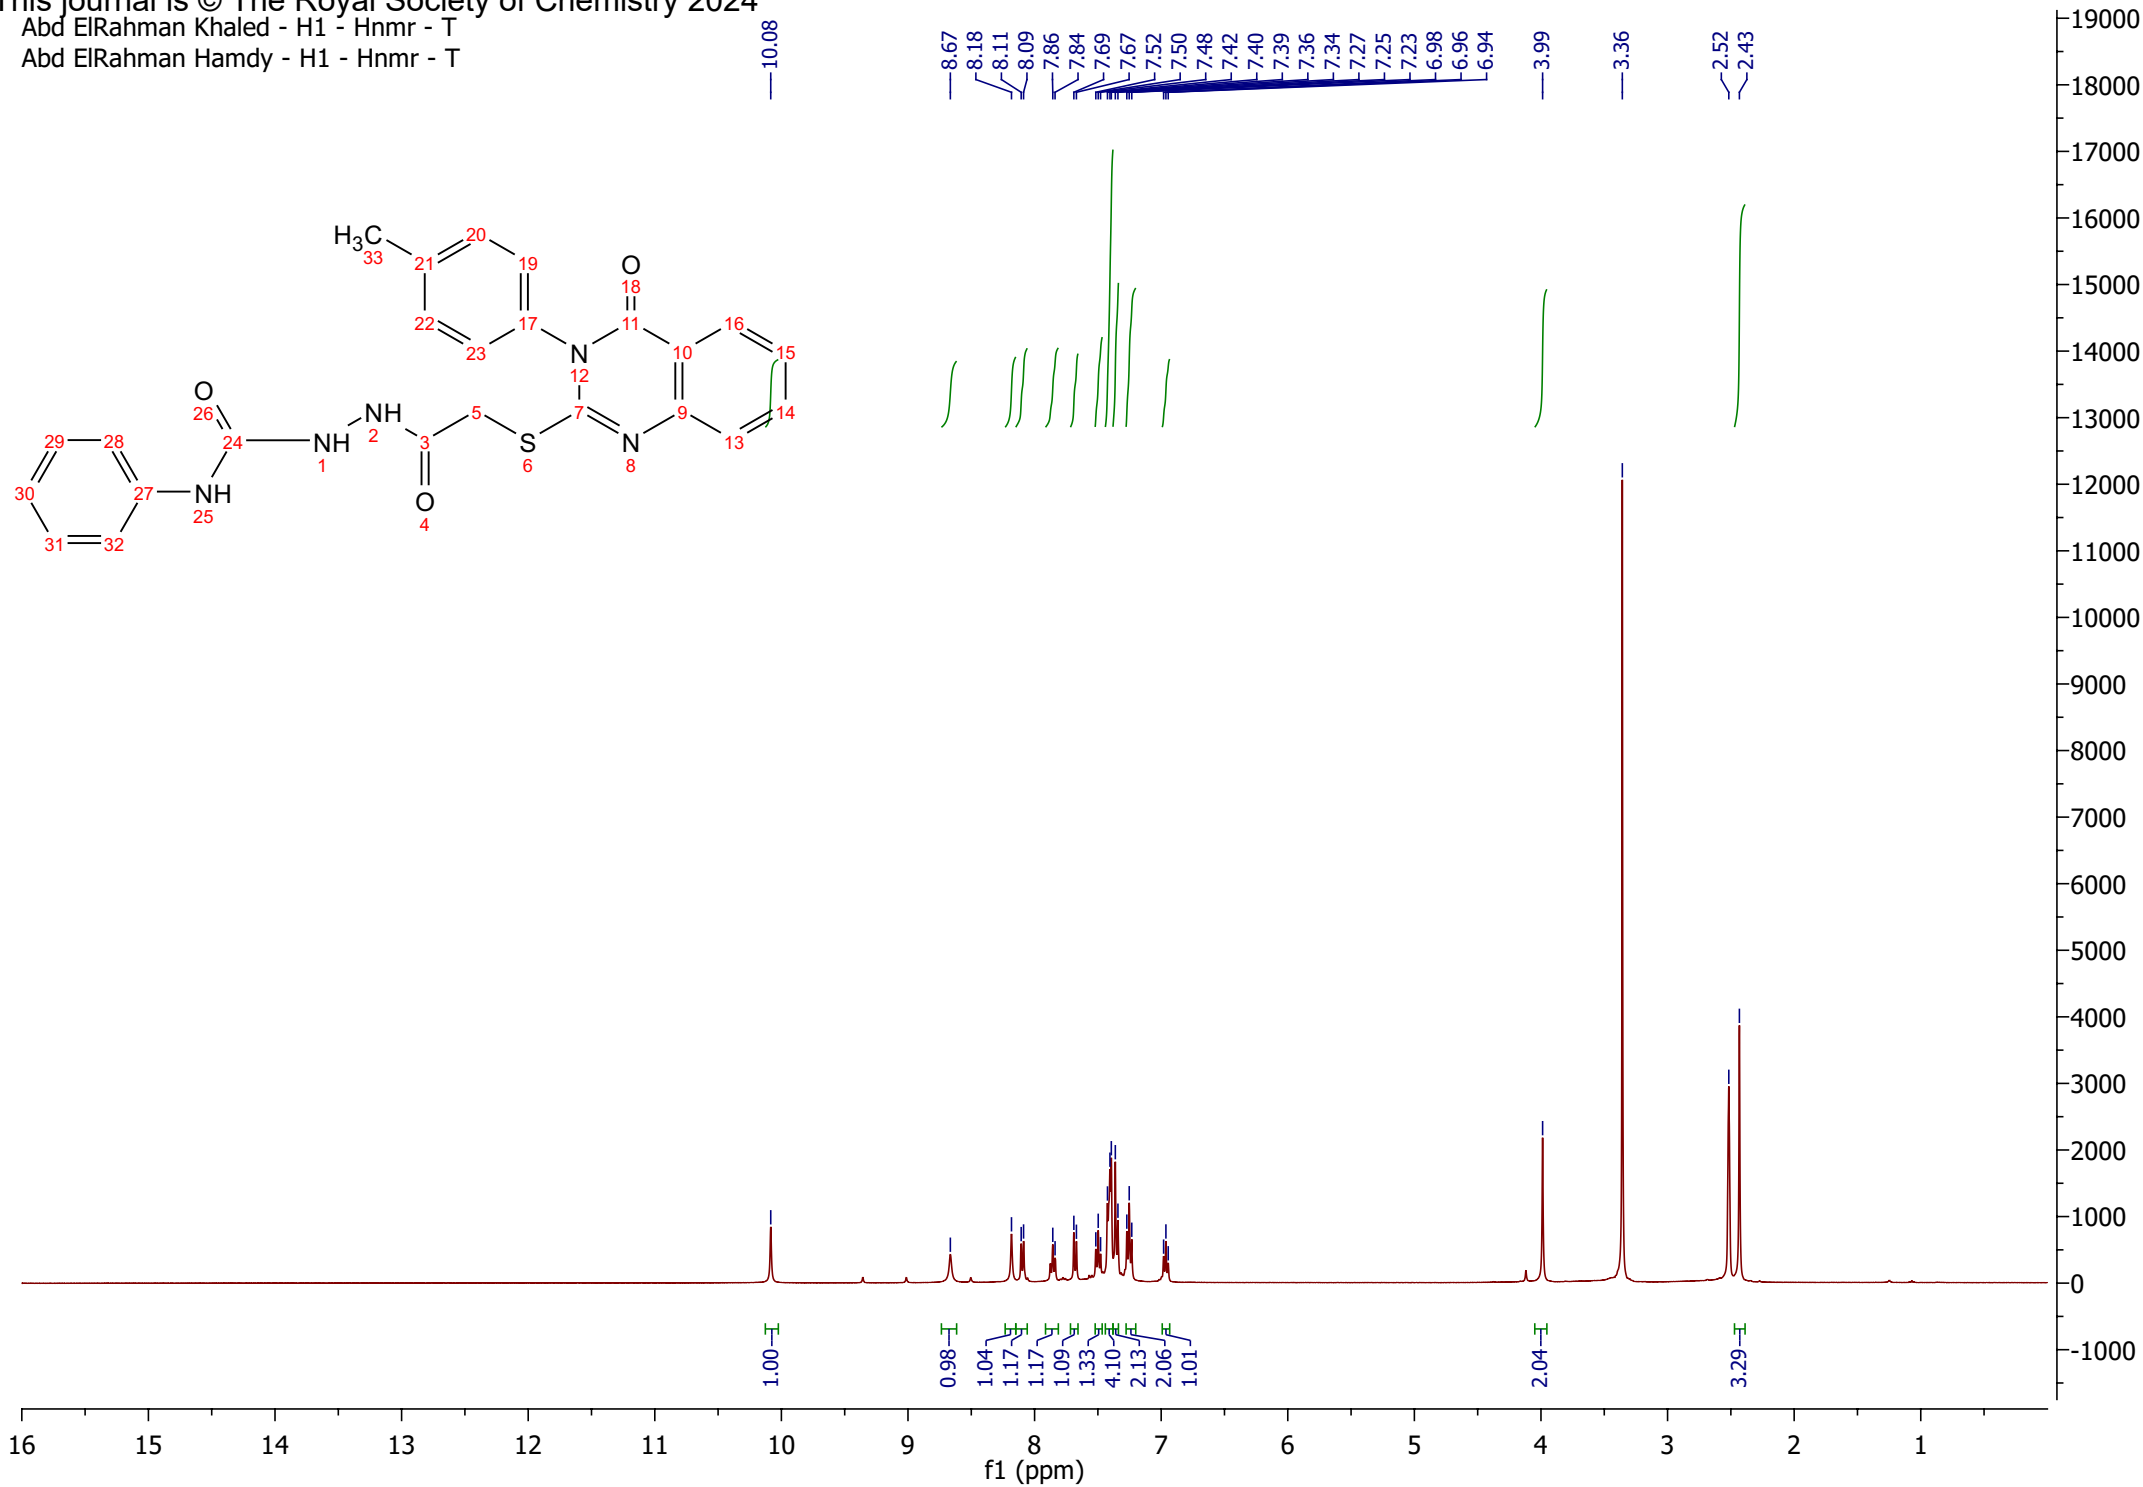

Abd ElRahman Hamdi - H2 - Hnmr - T  
Abd ElRahman Hamdi - H2 - Hnmr - T

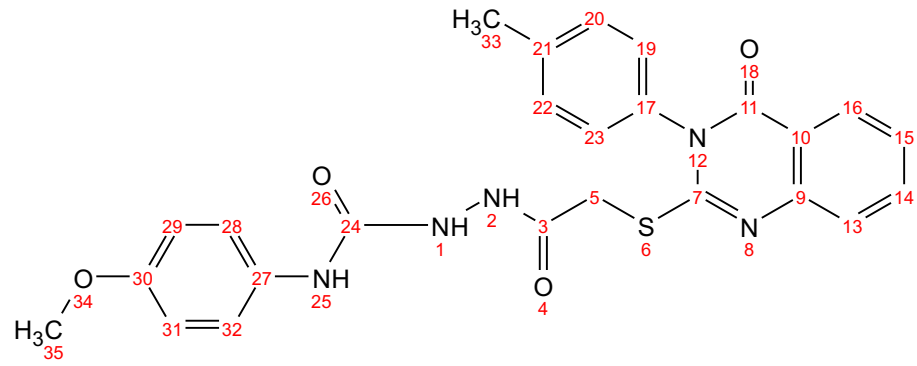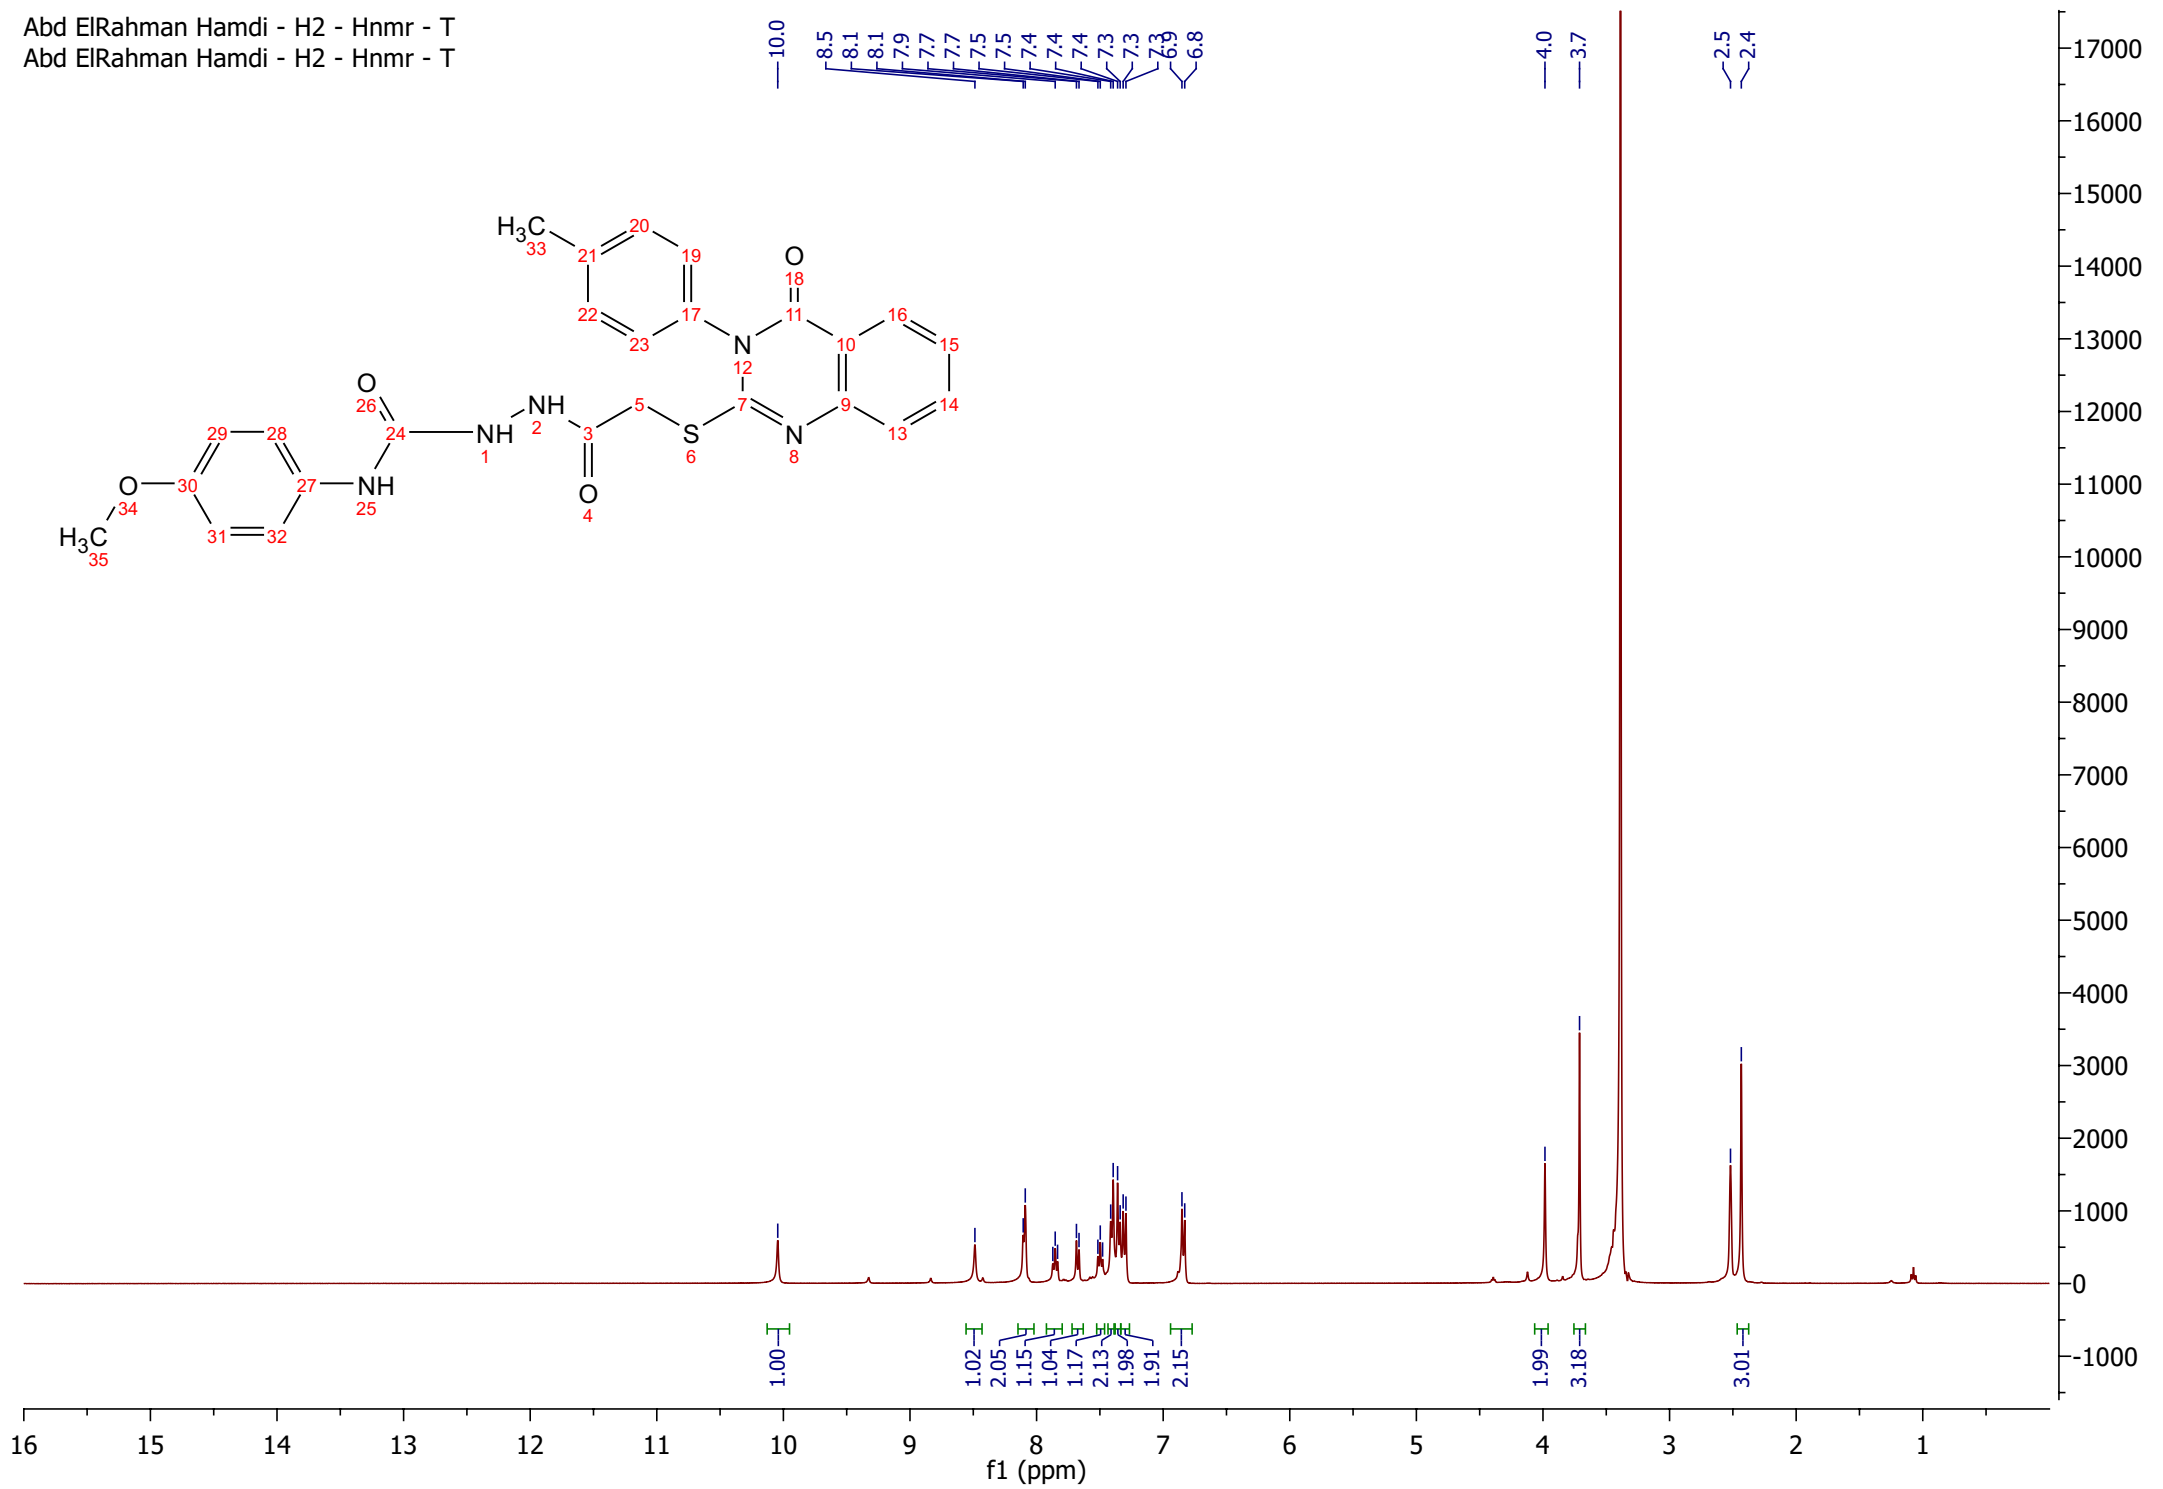

Abd ElRahman Hamdi - H4 - Hnmr - T  
Abd ElRahman Hamdi - H4 - Hnmr - T

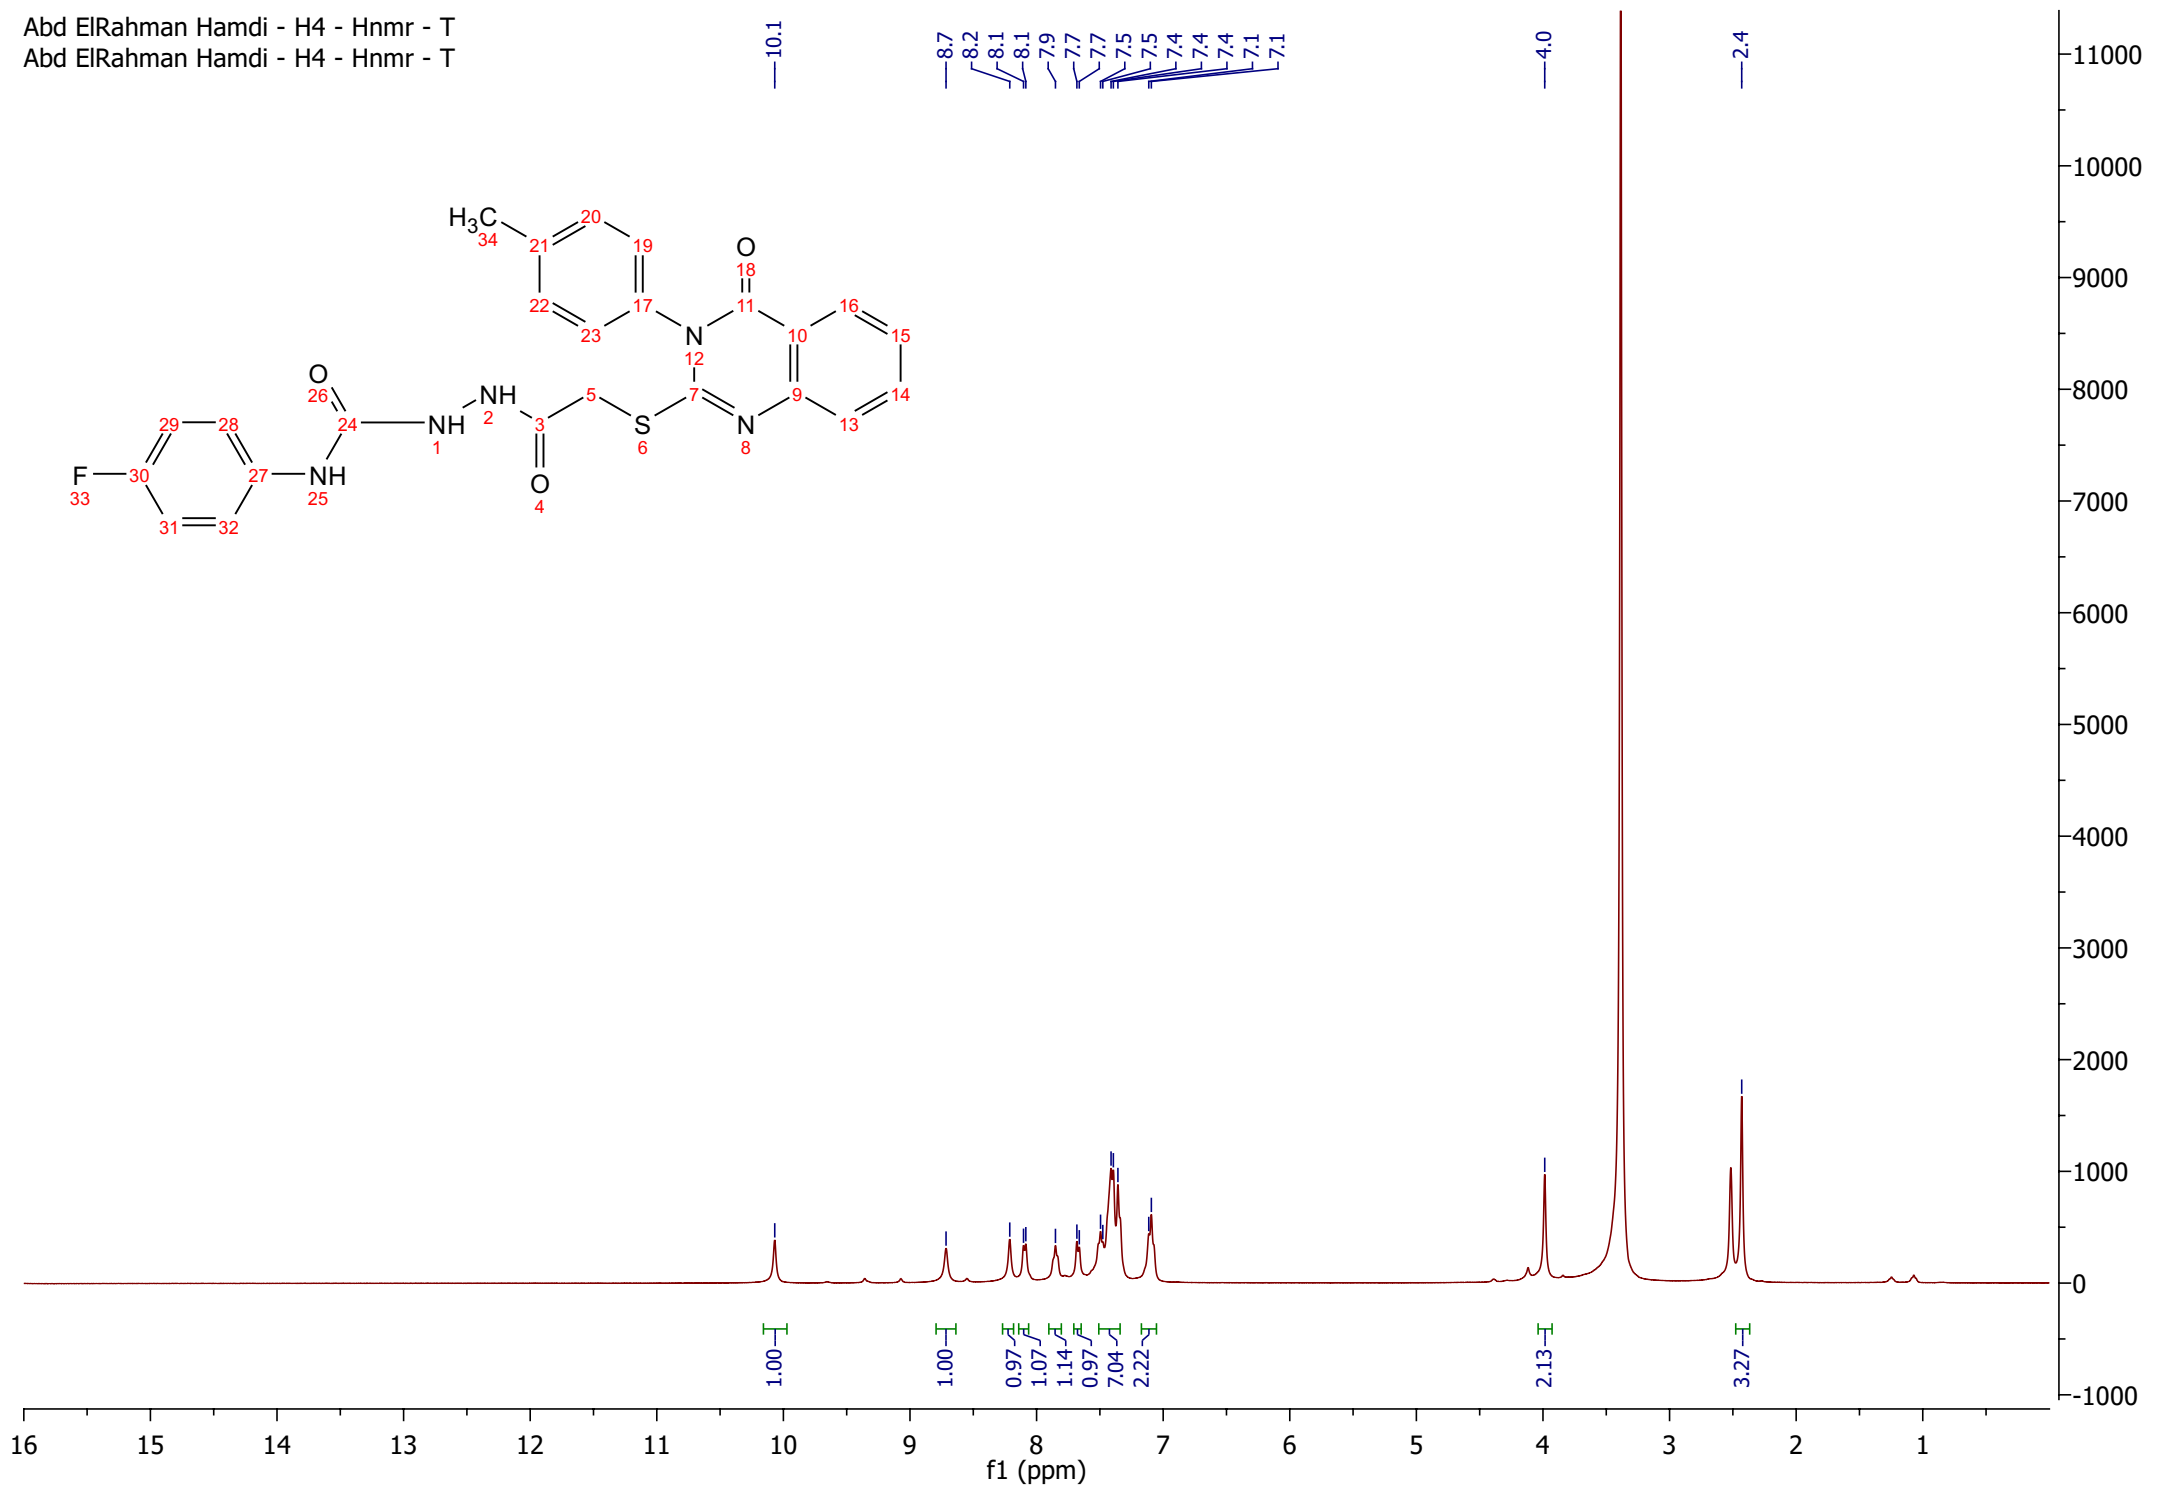

Abd ElRahman Hamdi - H5 - Hnmr - T  
Abd ElRahman Hamdi - H5 - Hnmr - T

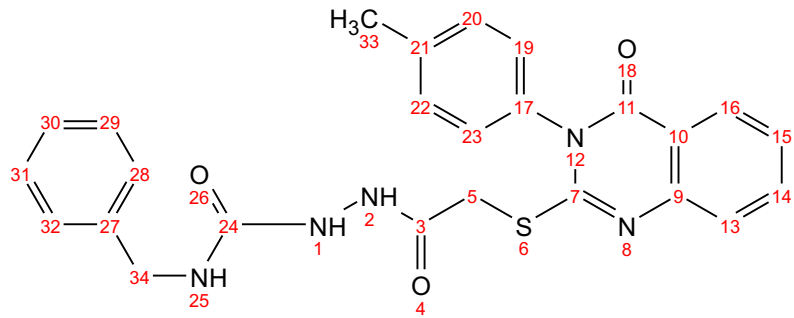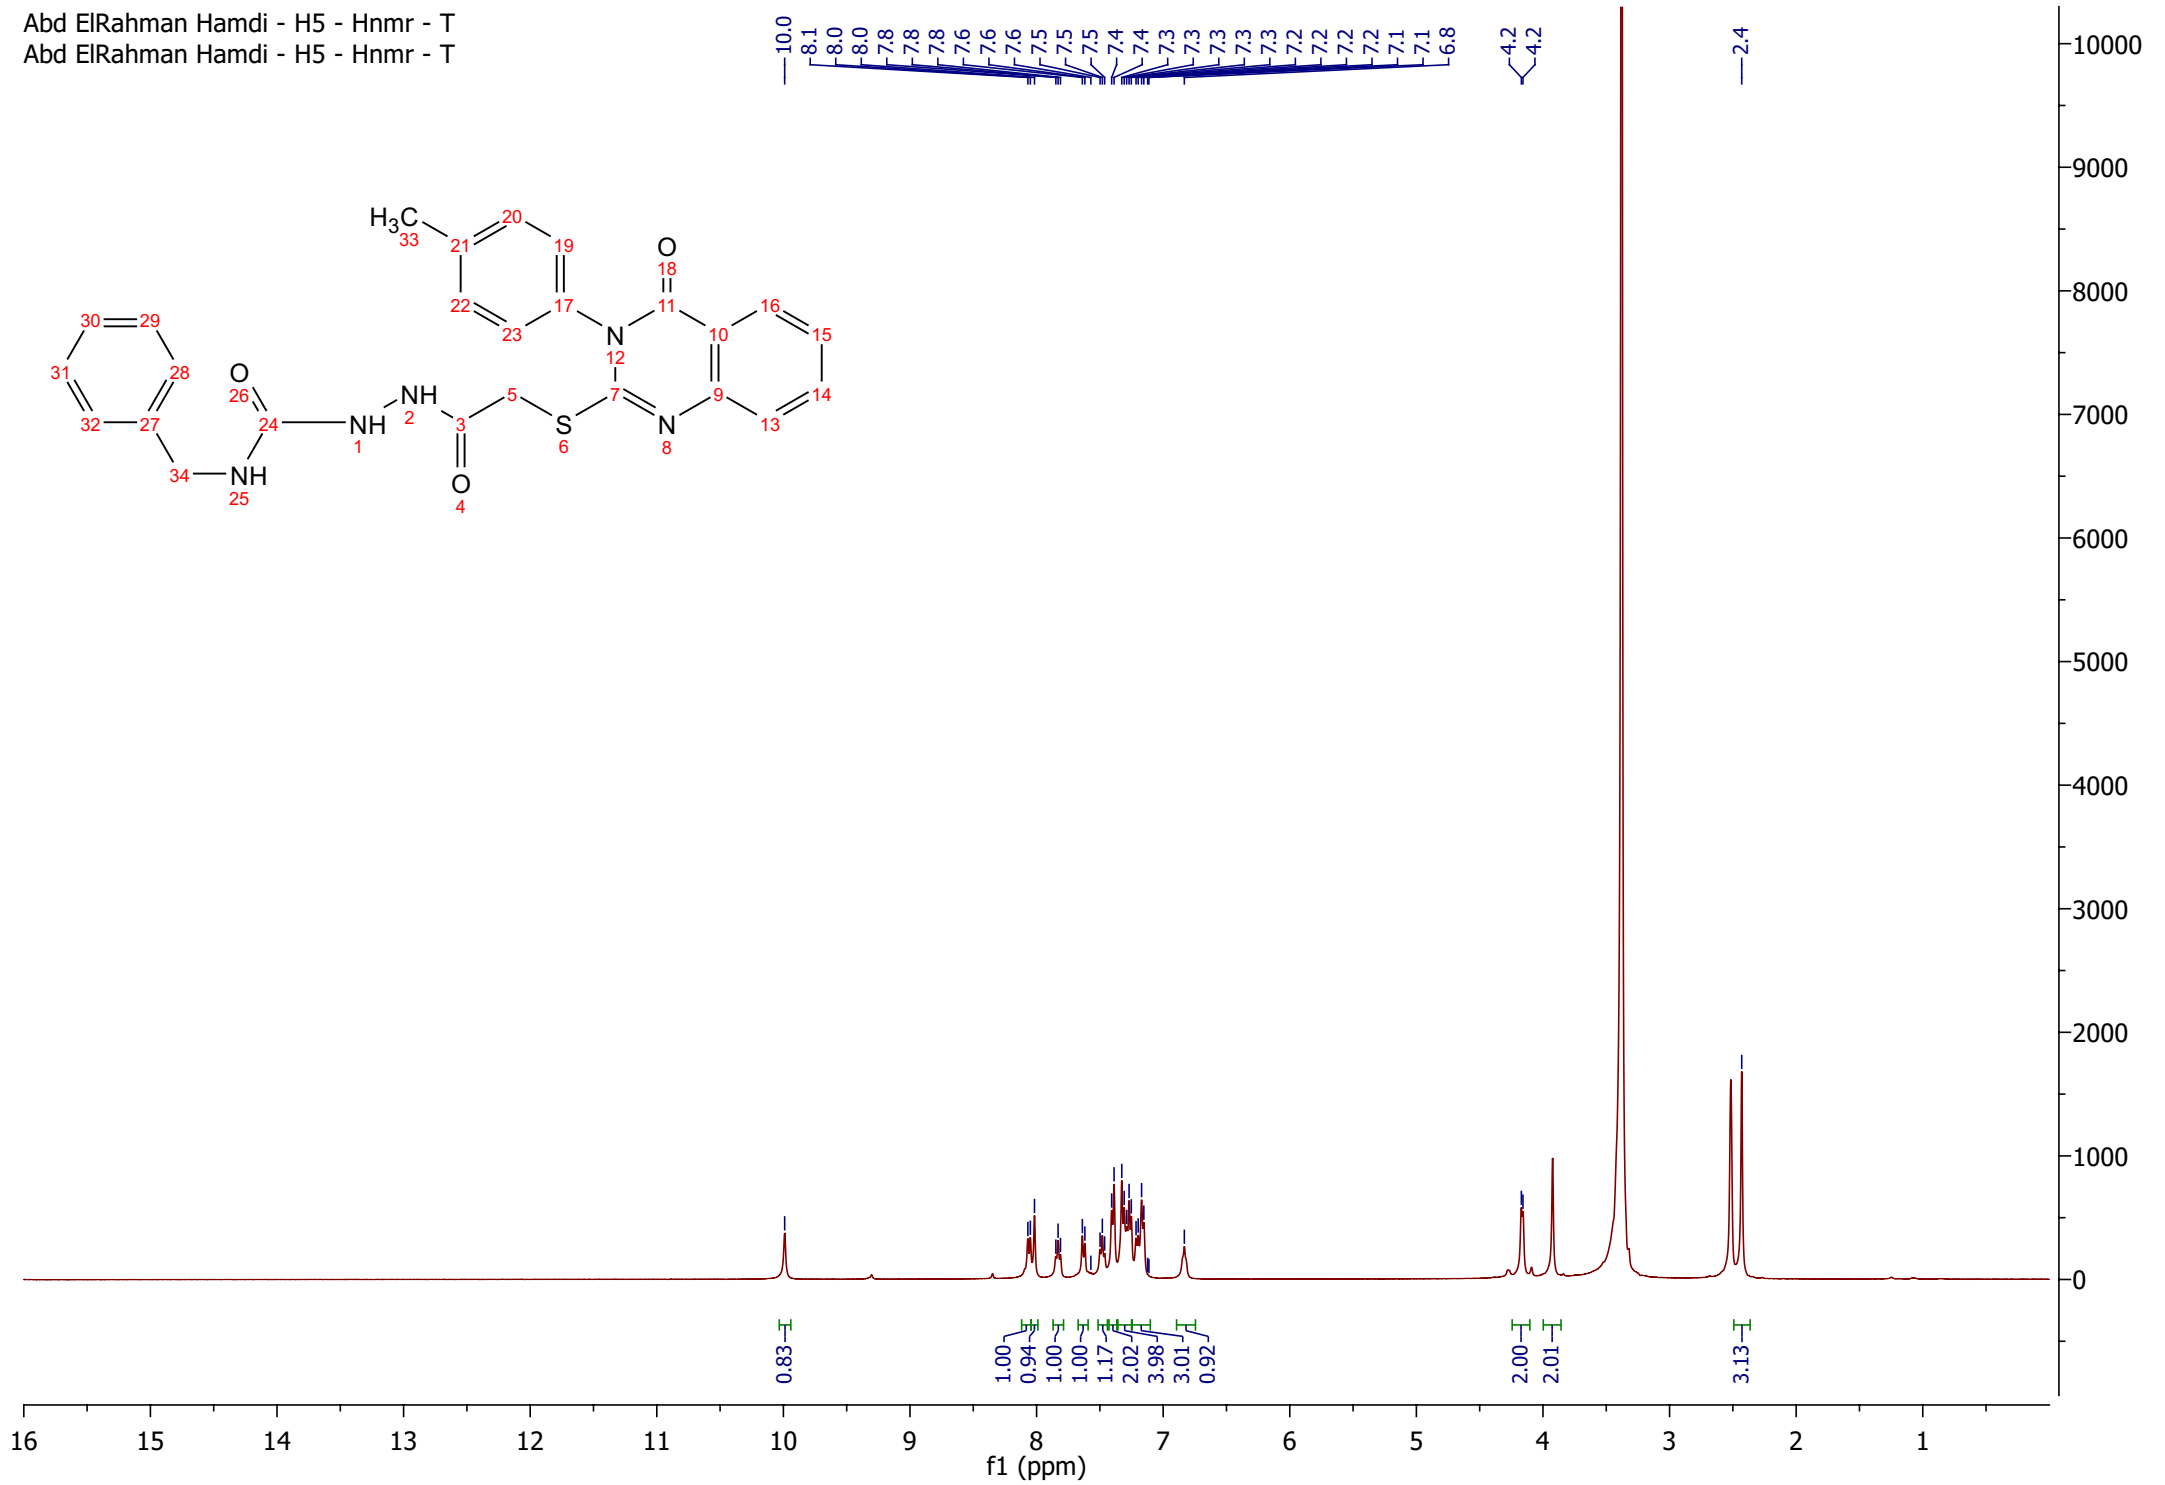

Abd ElRahman Hamdi - H6 - Hnmr - T  
Abd ElRahman Hamdi - H6 - Hnmr - T

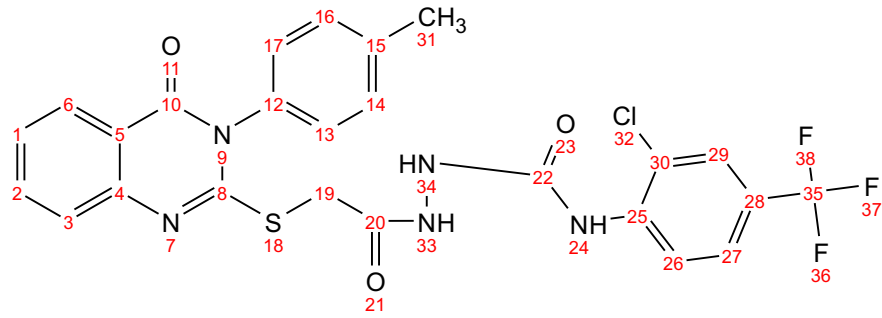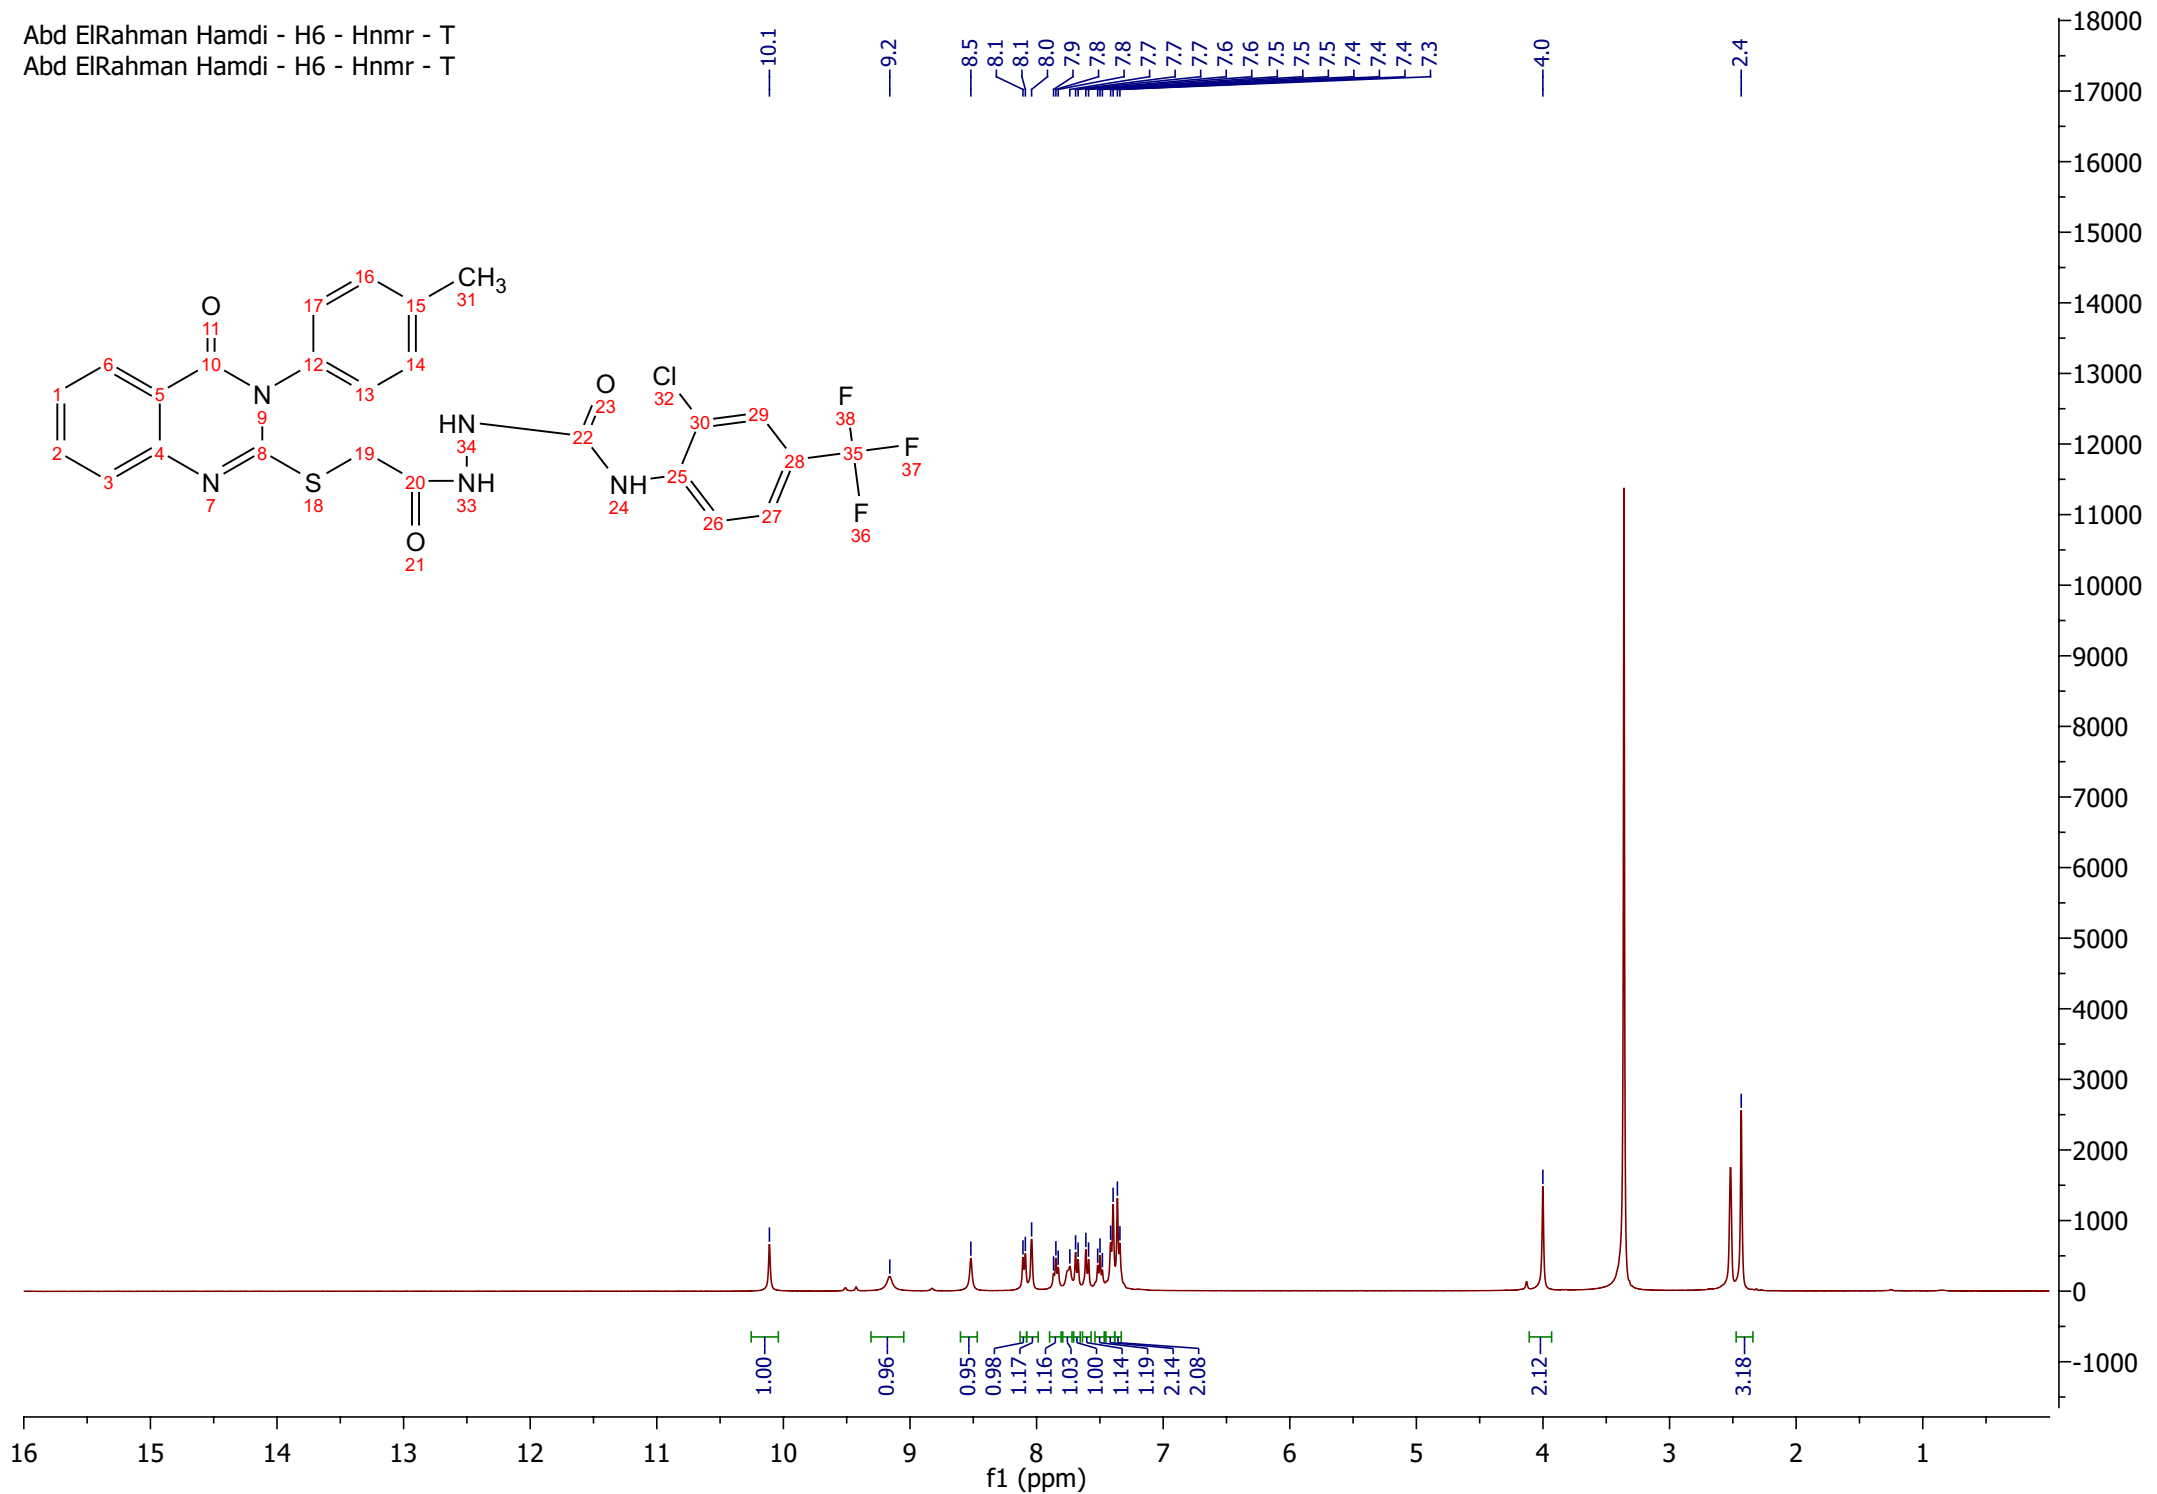

Abd ElRahman Hamdi - H11 - Hnmr - T  
Abd ElRahman Hamdi - H11 - Hnmr - T

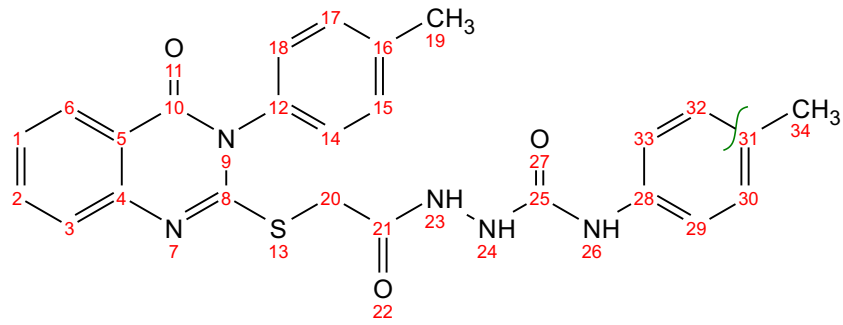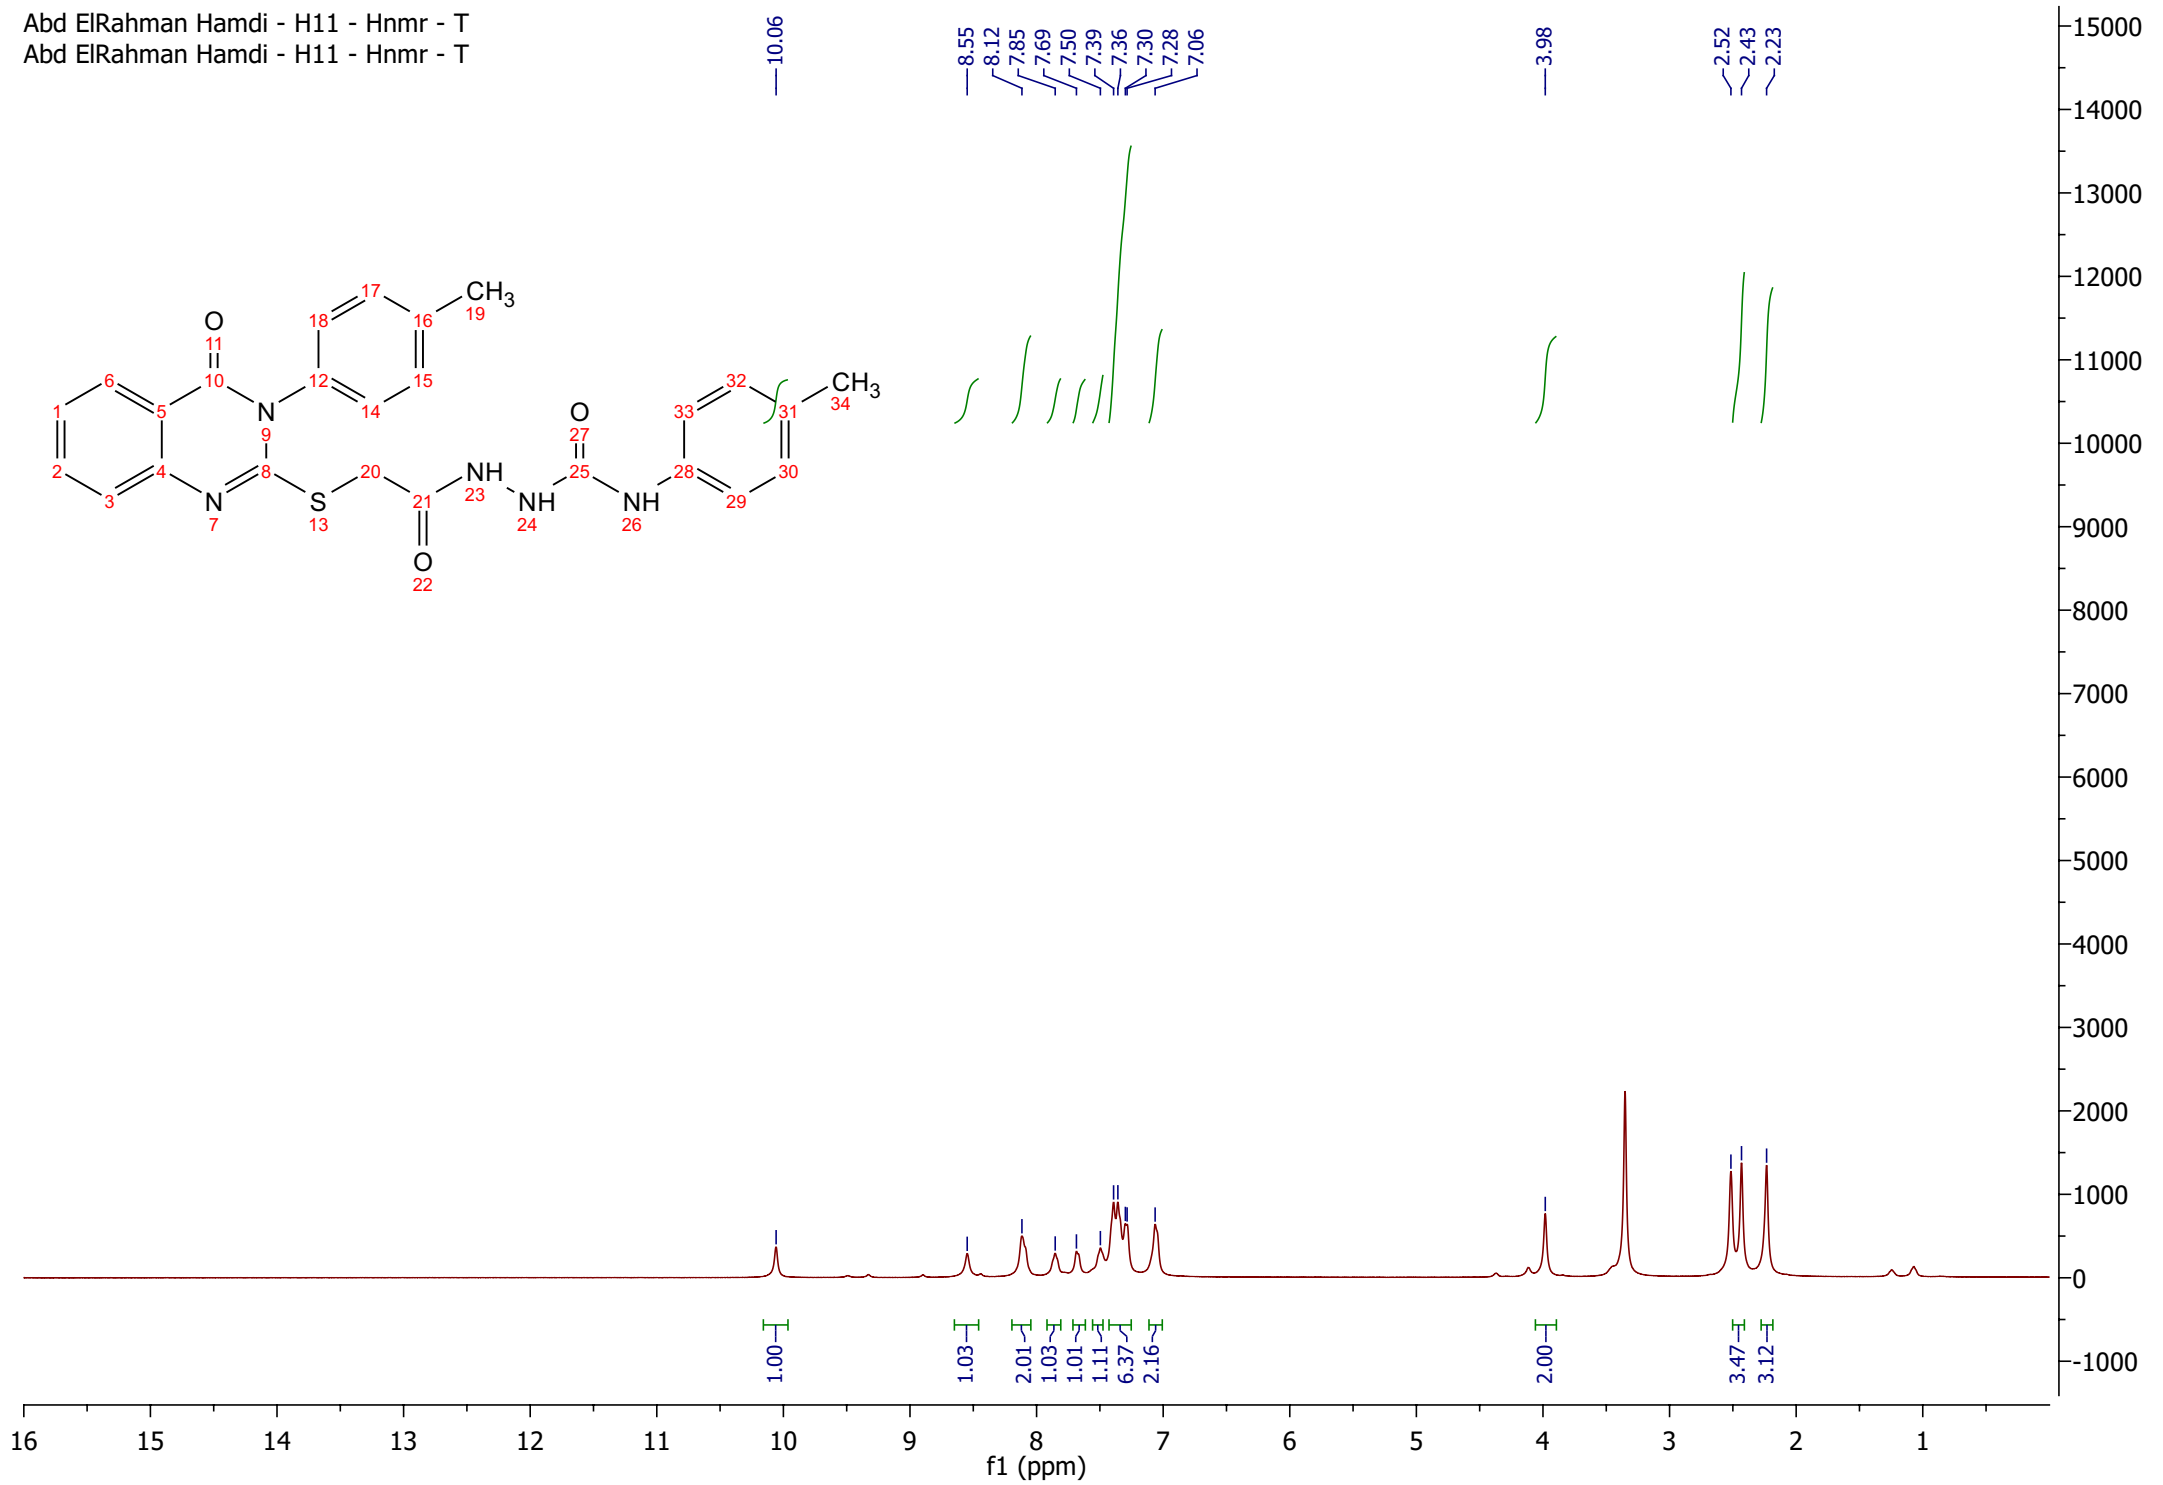

Abd ElRahman Hamdi - H12 - Hnmr - T  
Abd ElRahman Hamdi - H12 - Hnmr - T

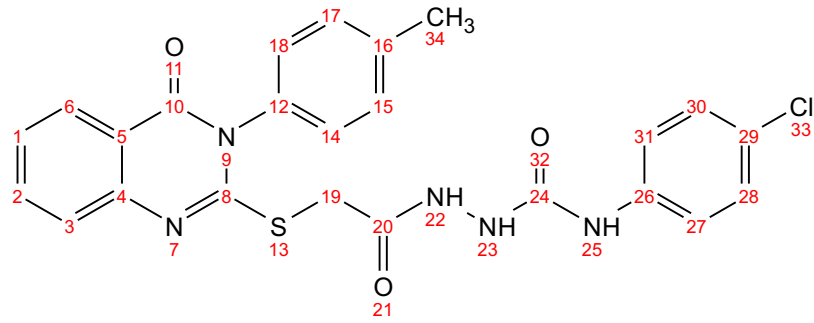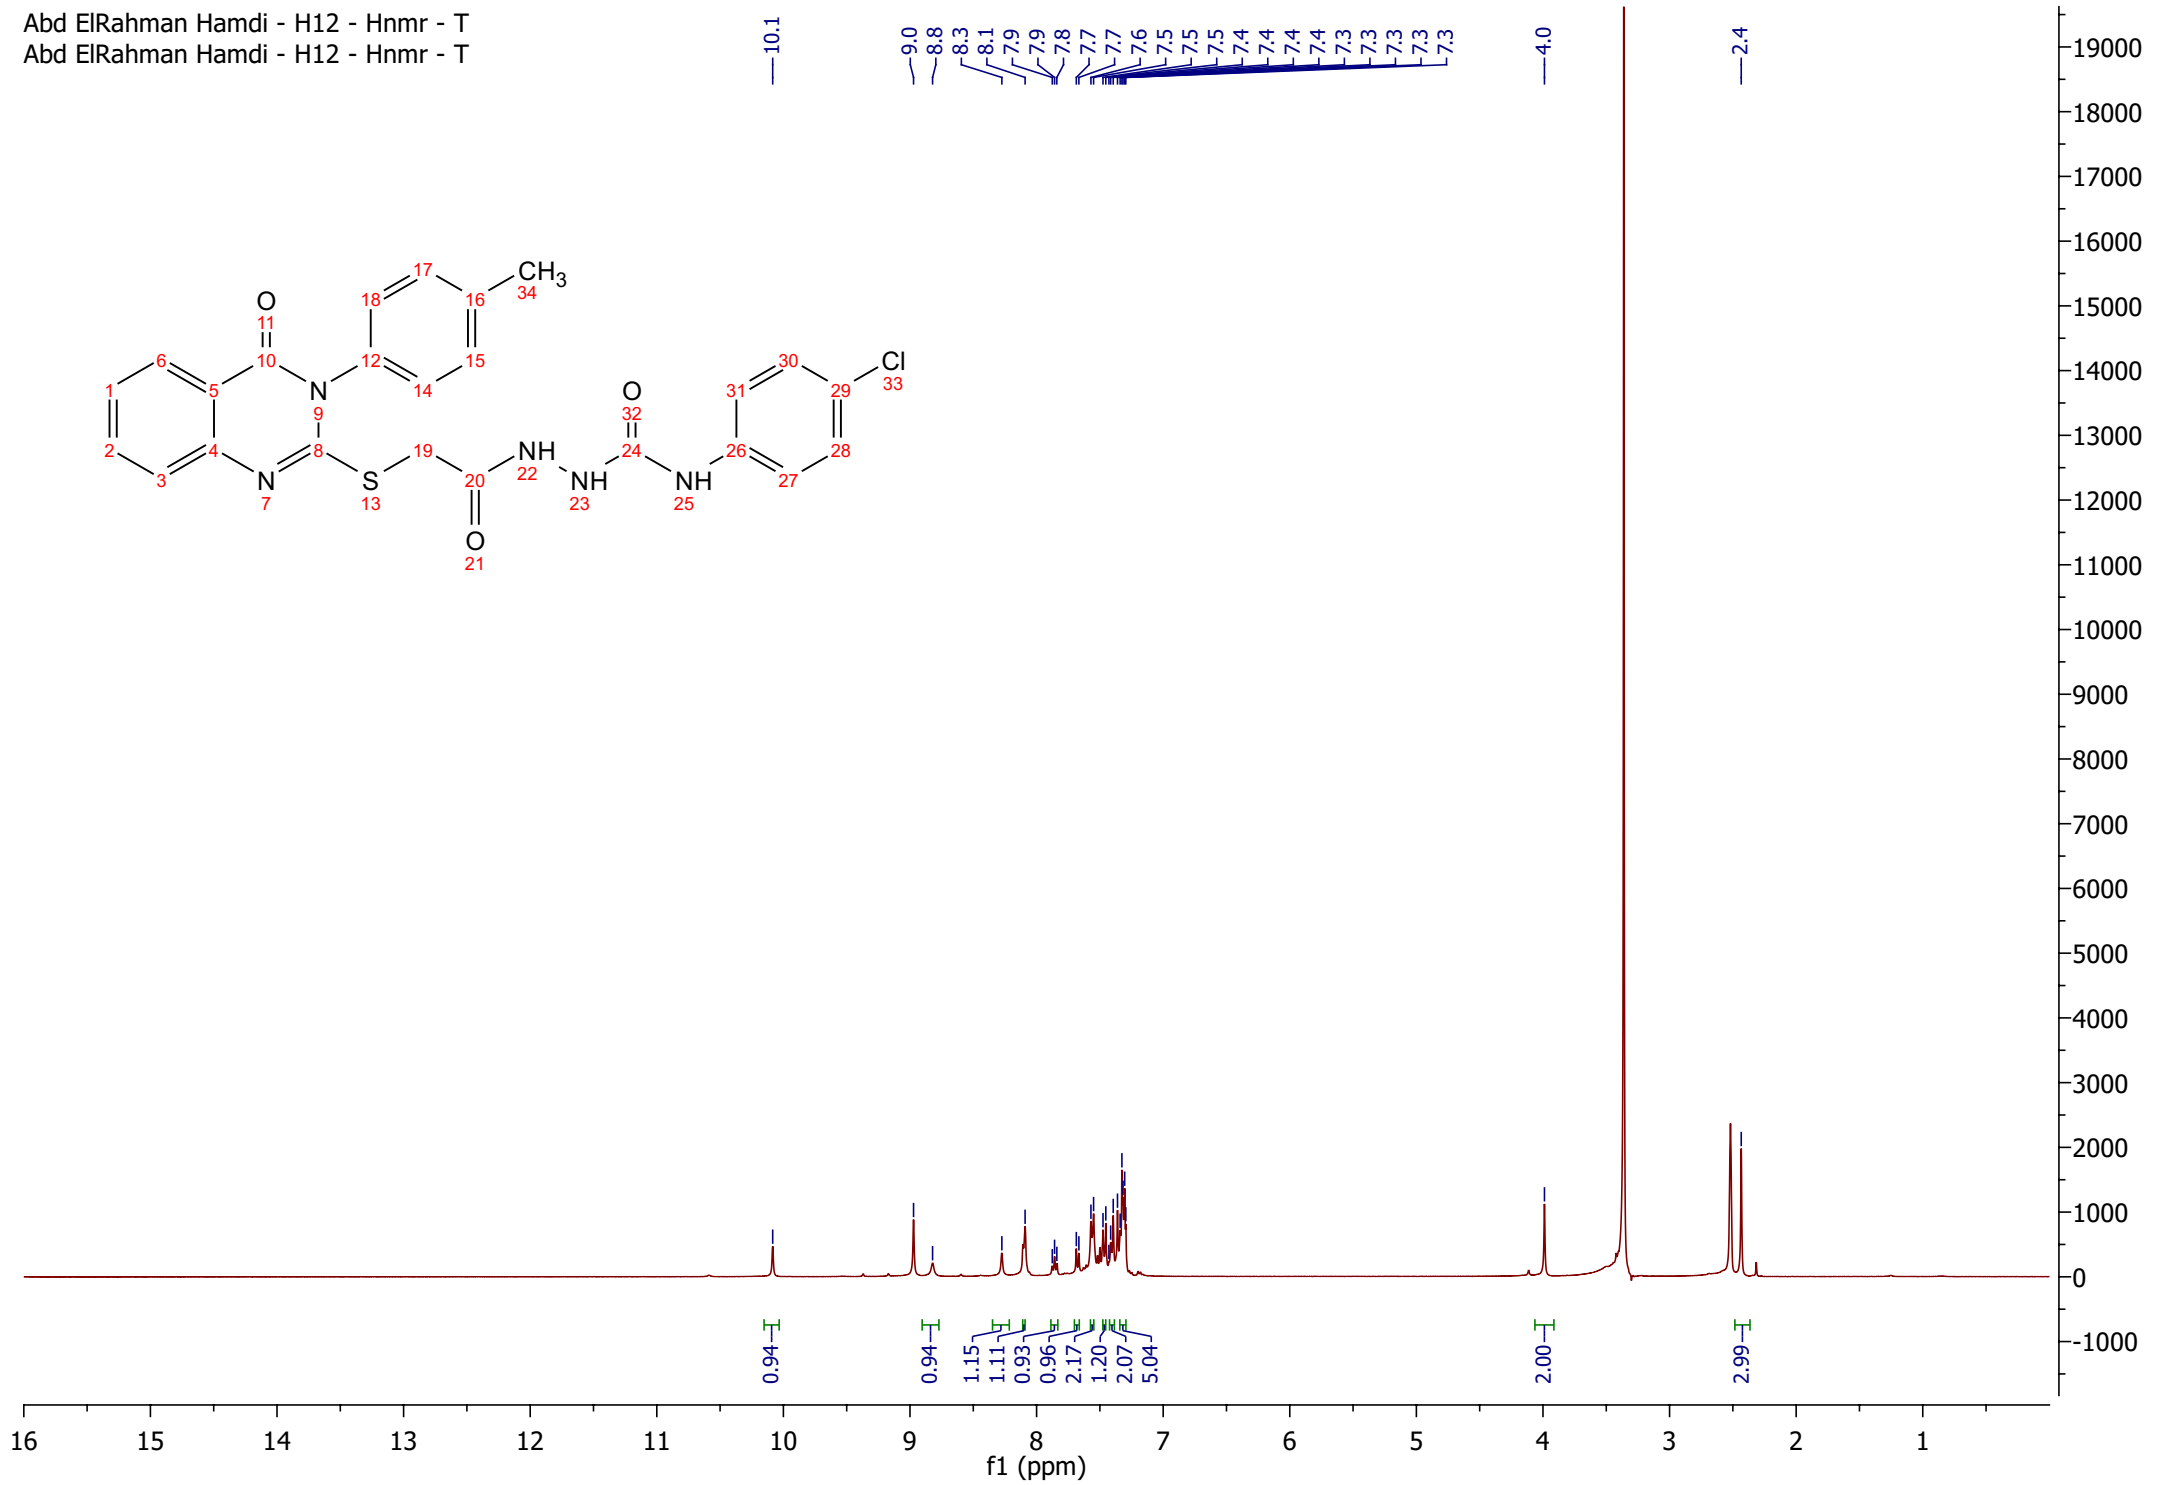

Samar Samir-T42-AS-proton  
Samar Samir-T42-AS-proton

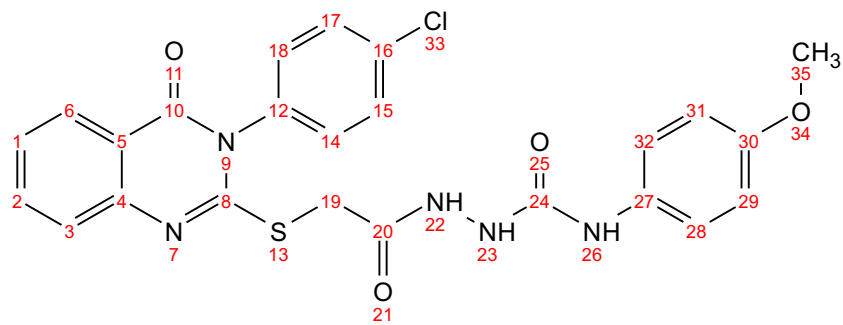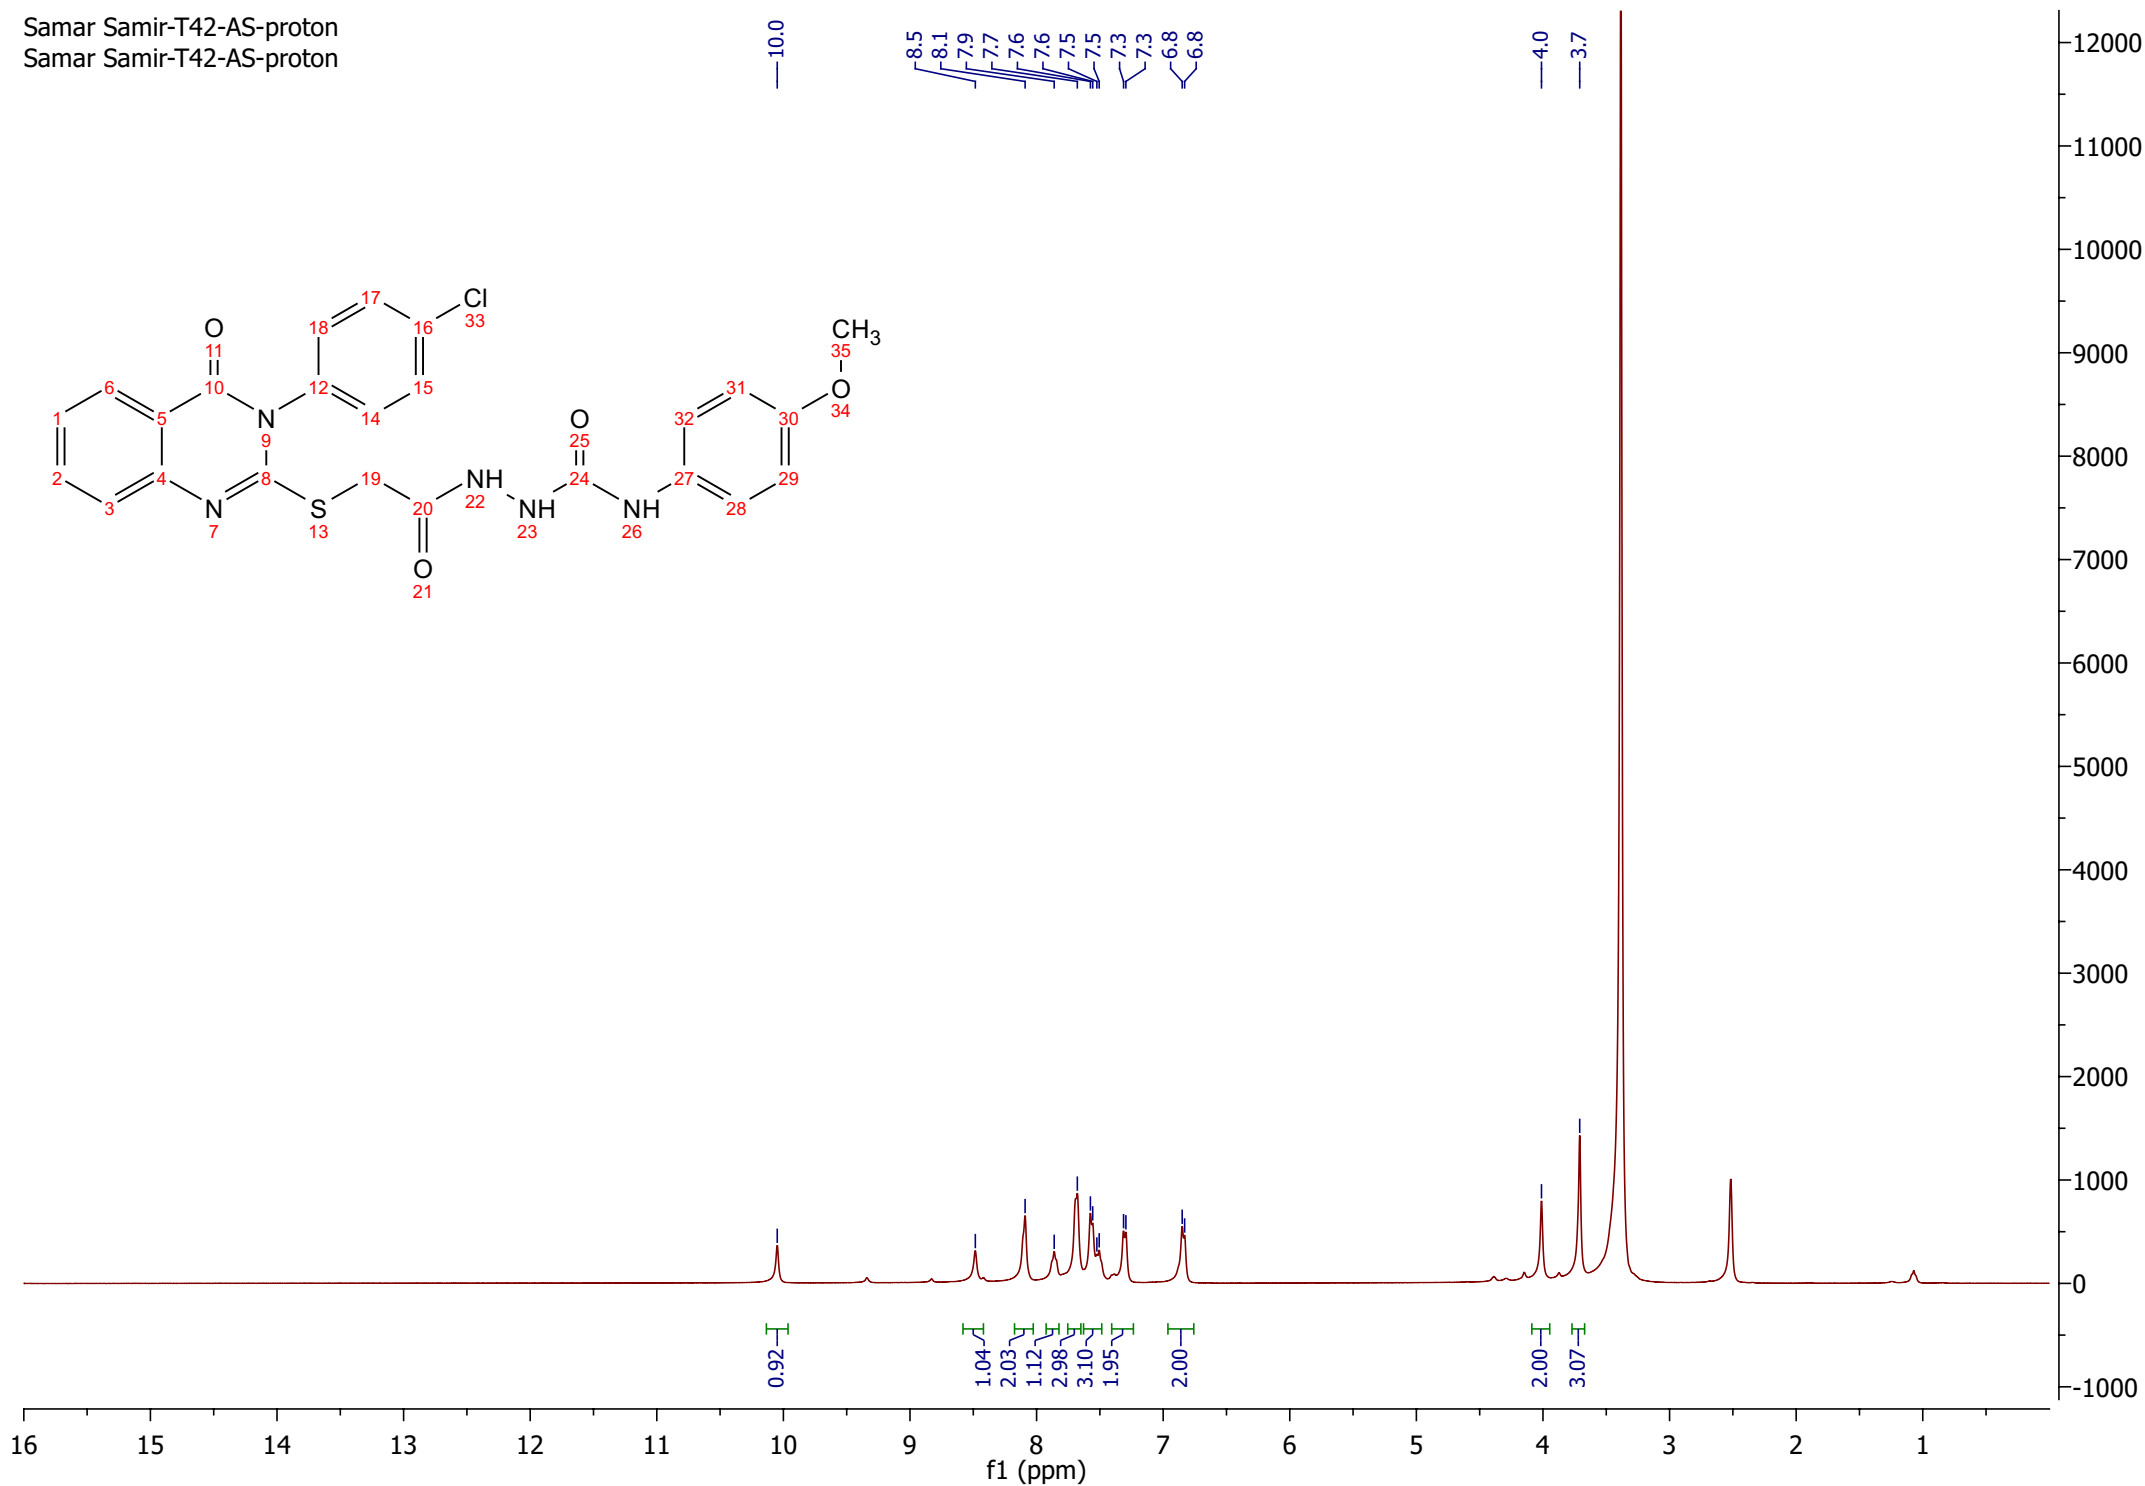



Samar Samir-T43-AS-proton  
Samar Samir-T43-AS-proton

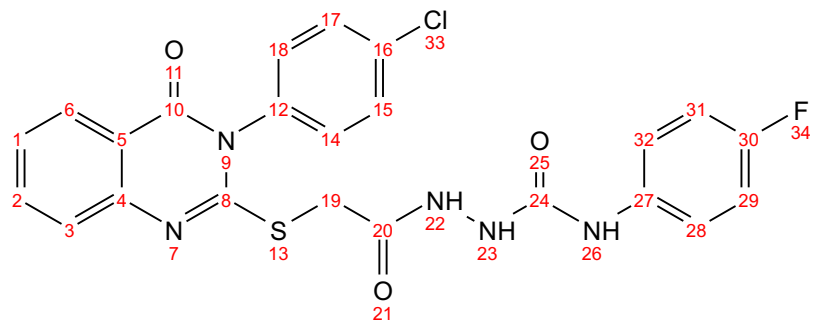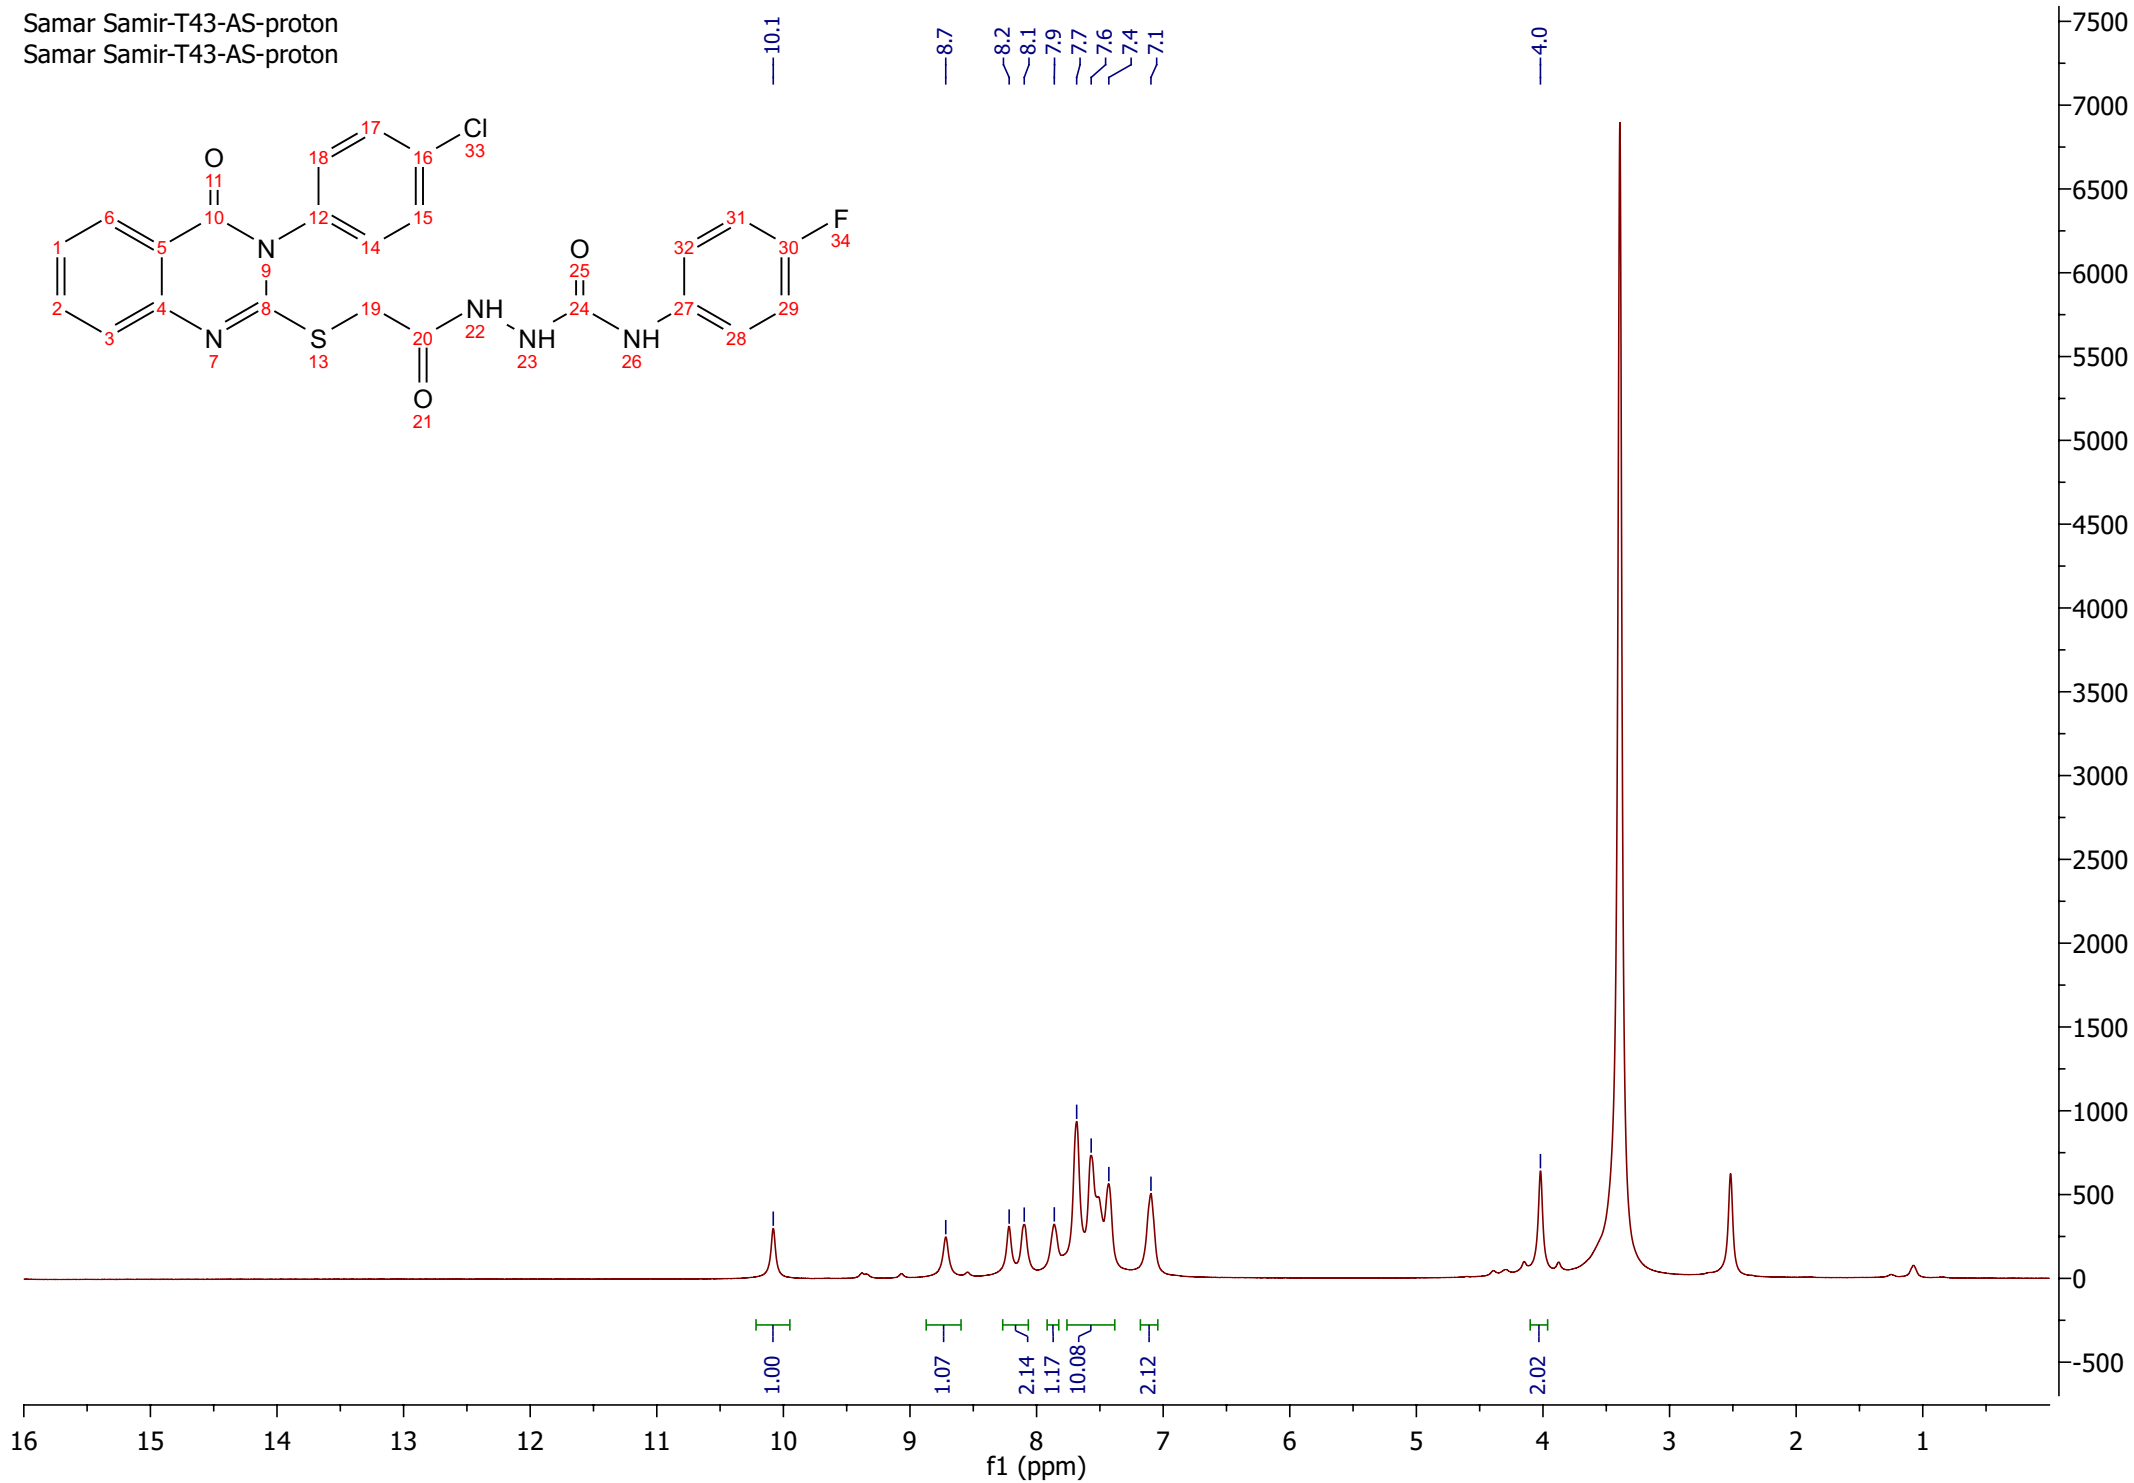

Samar Samir-T44-AS-proton  
Samar Samir-T44-AS-proton

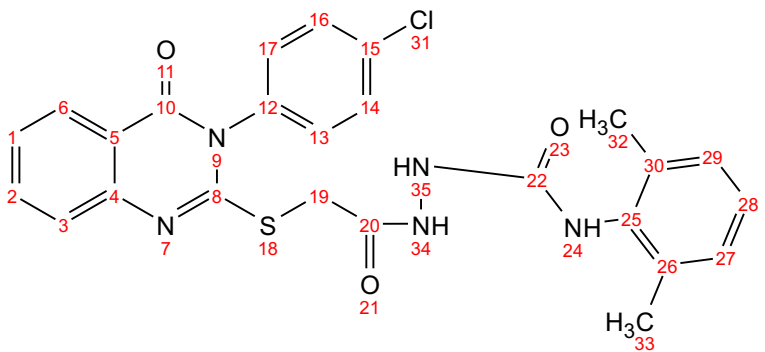

10.1  
8.4  
8.1  
8.1  
8.1  
7.9  
7.9  
7.8  
7.7  
7.7  
7.6  
7.6  
7.5  
7.5  
7.5  
7.0  
6.6

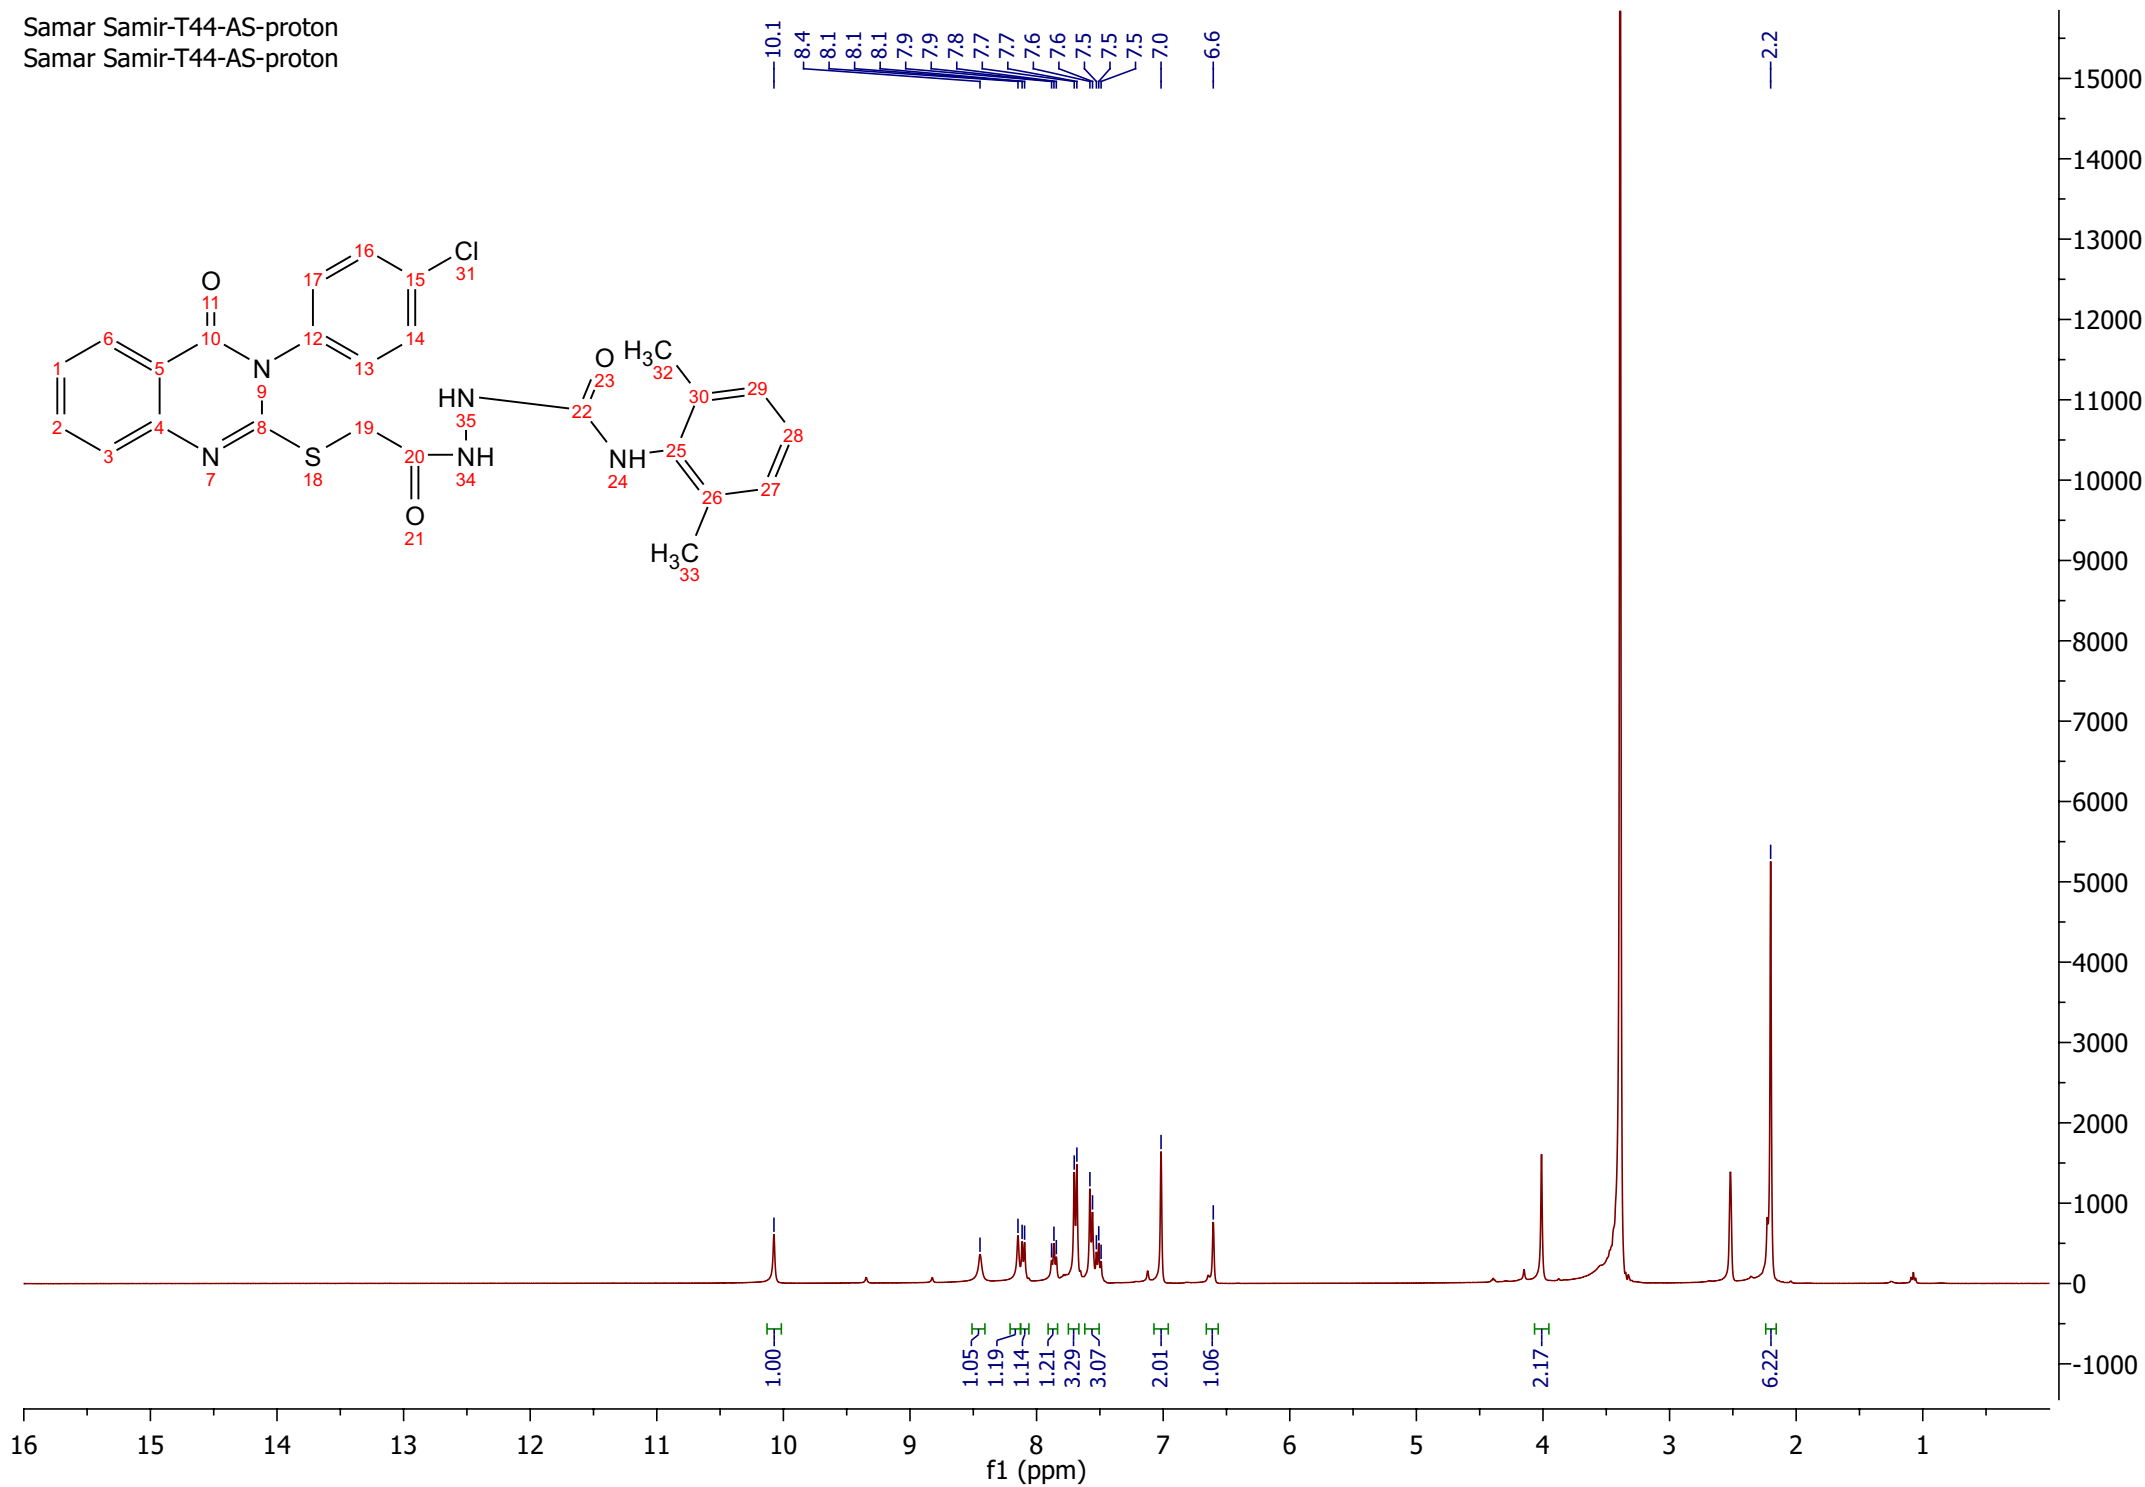

Samar Samir-T45-AS-proton  
Samar Samir-T45-AS-proton

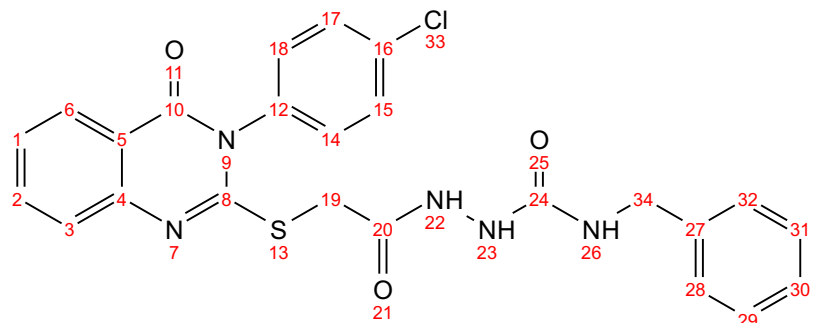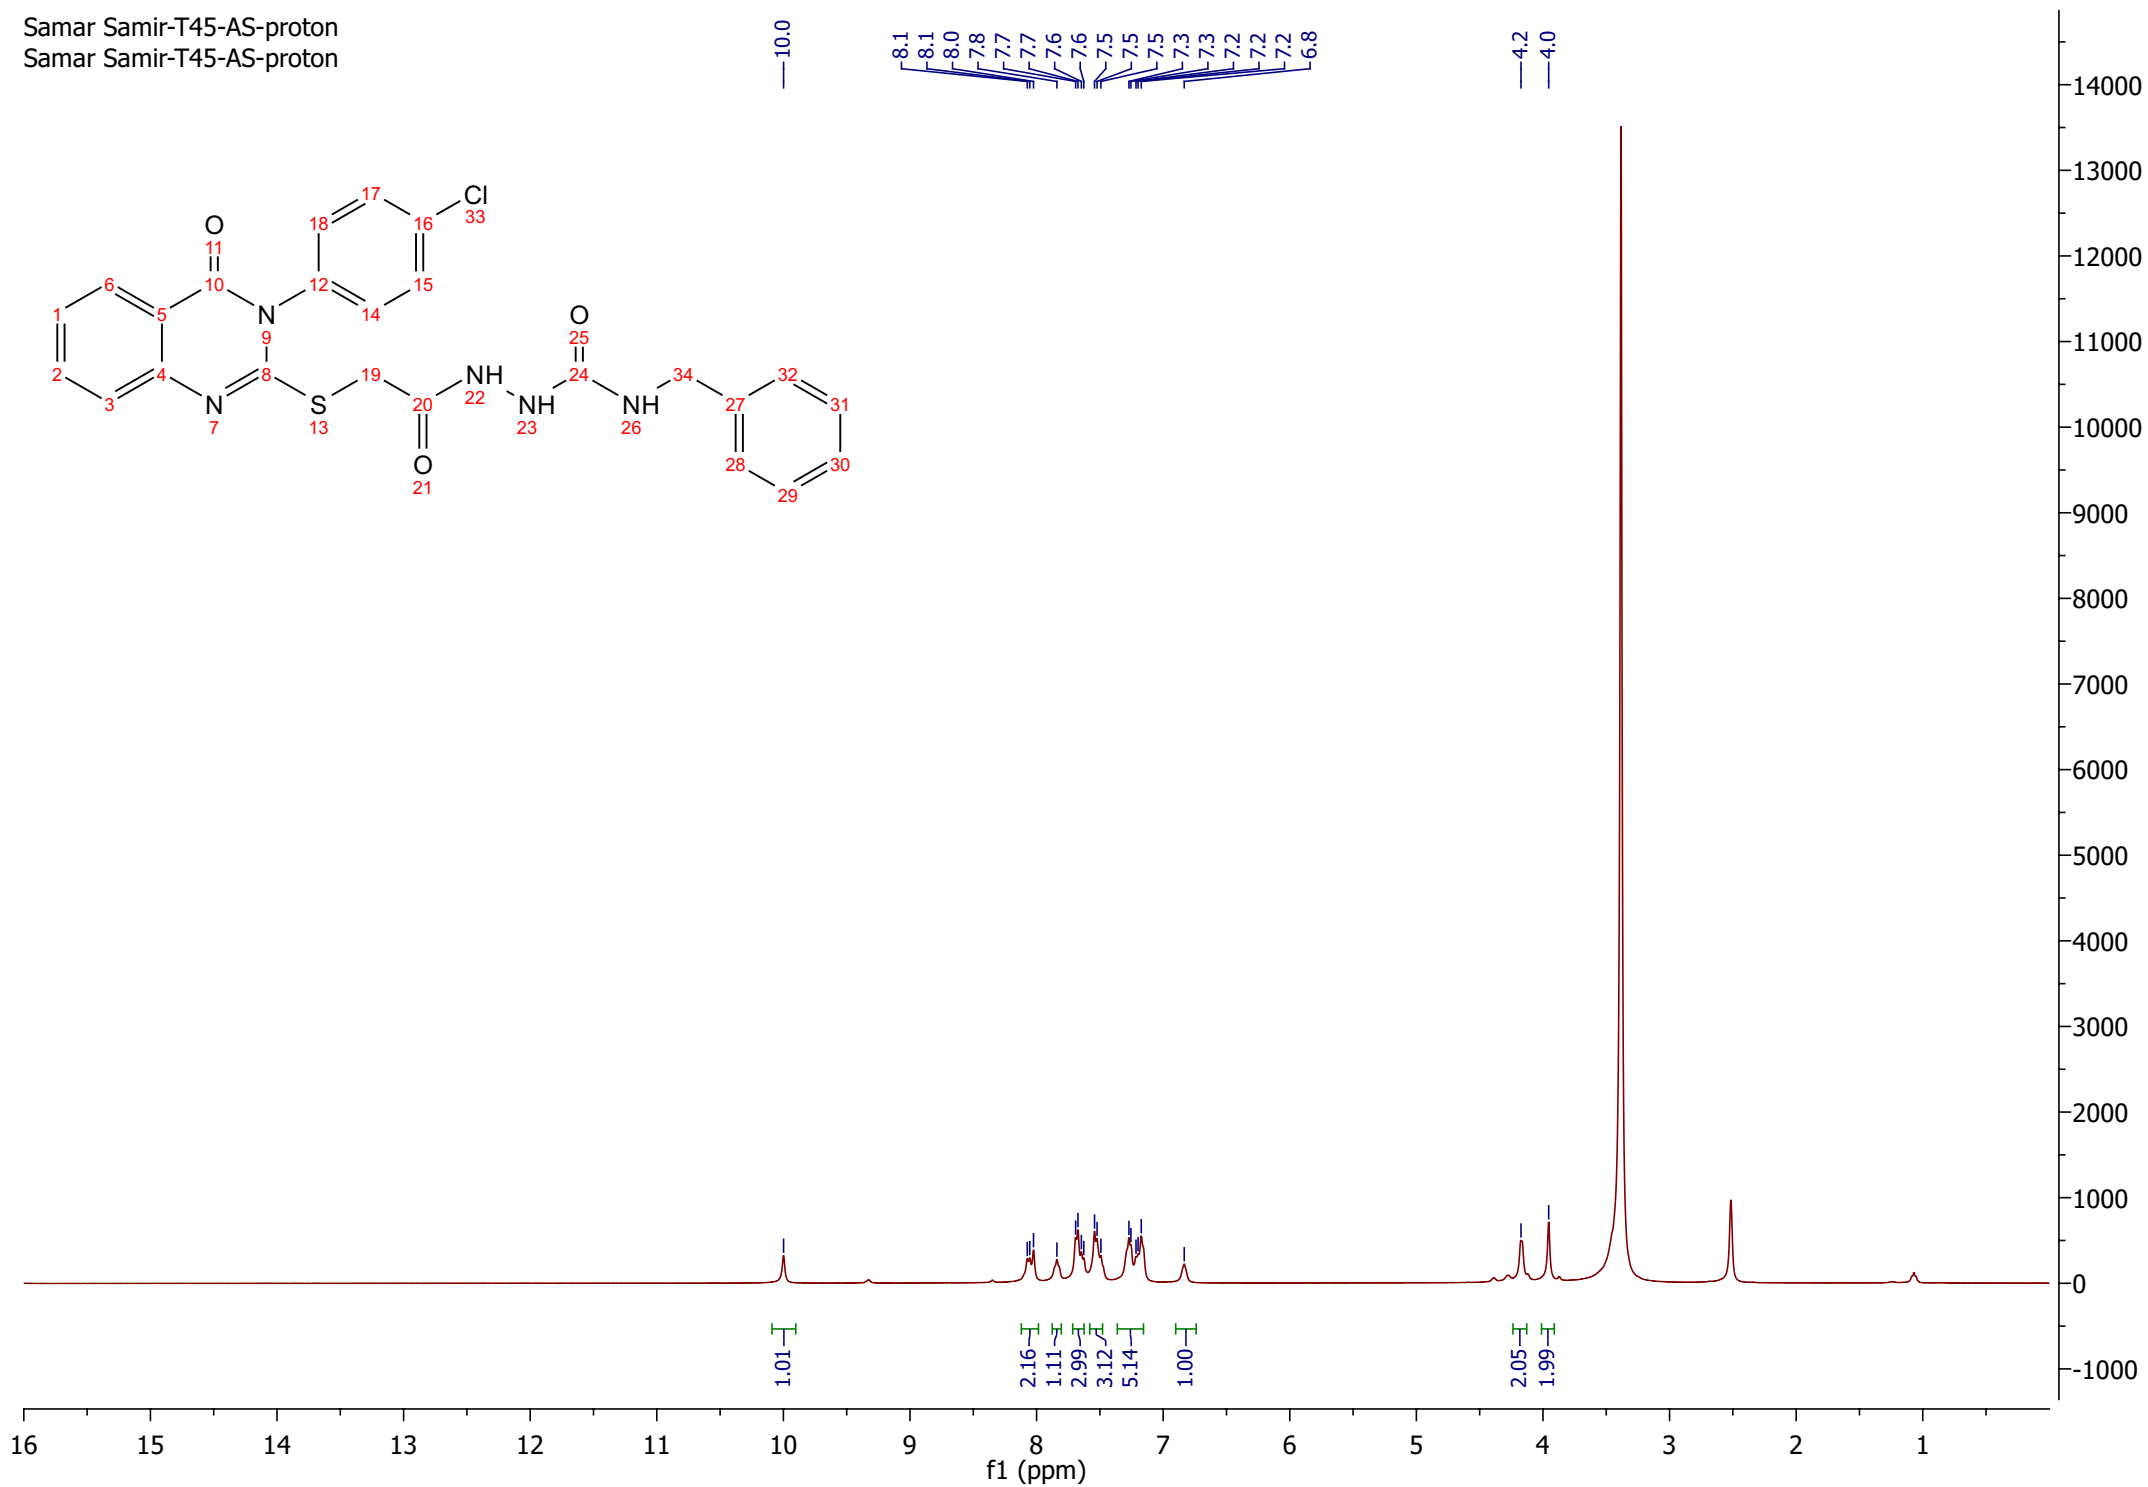

Abd ElRahman Hamdi - Tu6 - Hnmr - T  
Abd ElRahman Hamdi - Tu6 - Hnmr - T

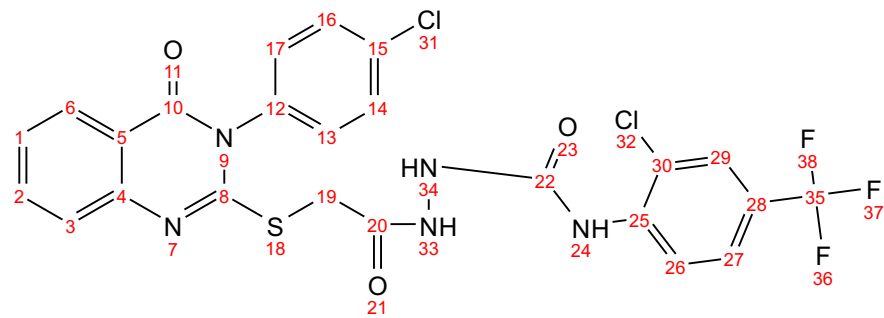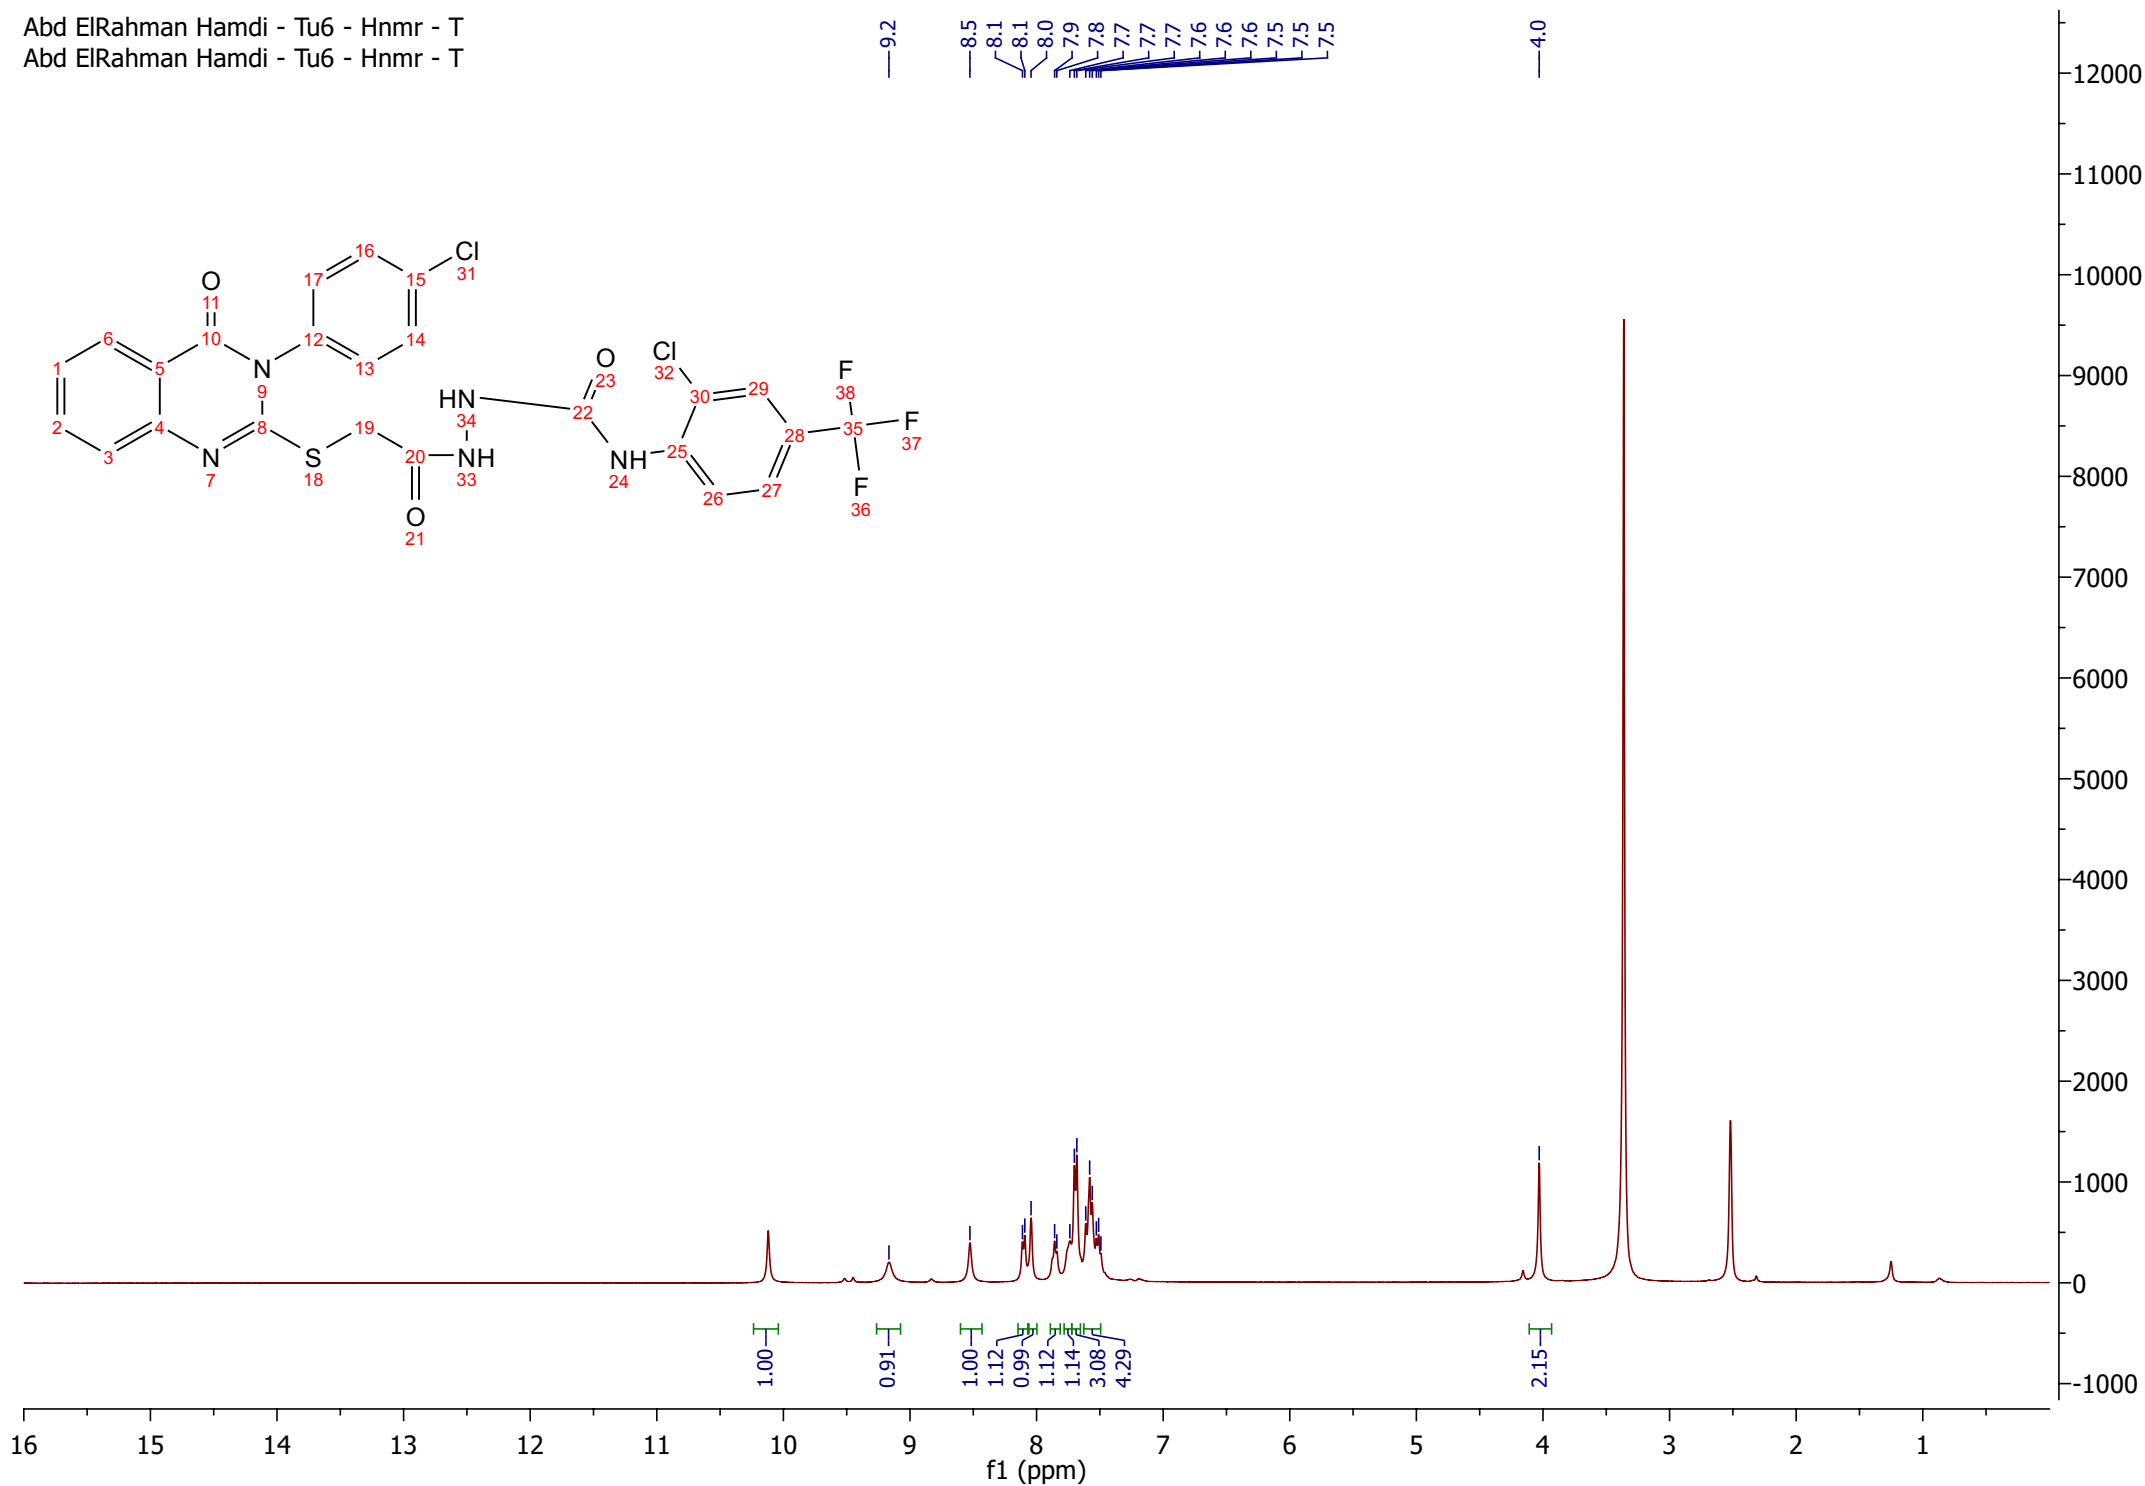

Abd ElRahman Hamdi - Tu12 - Hnmr - T  
Abd ElRahman Hamdi - Tu12 - Hnmr - T

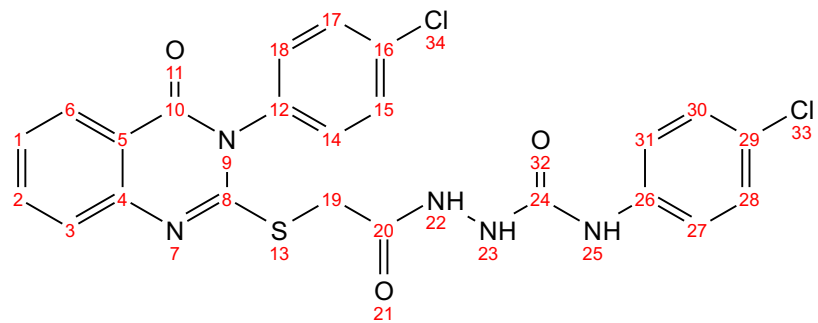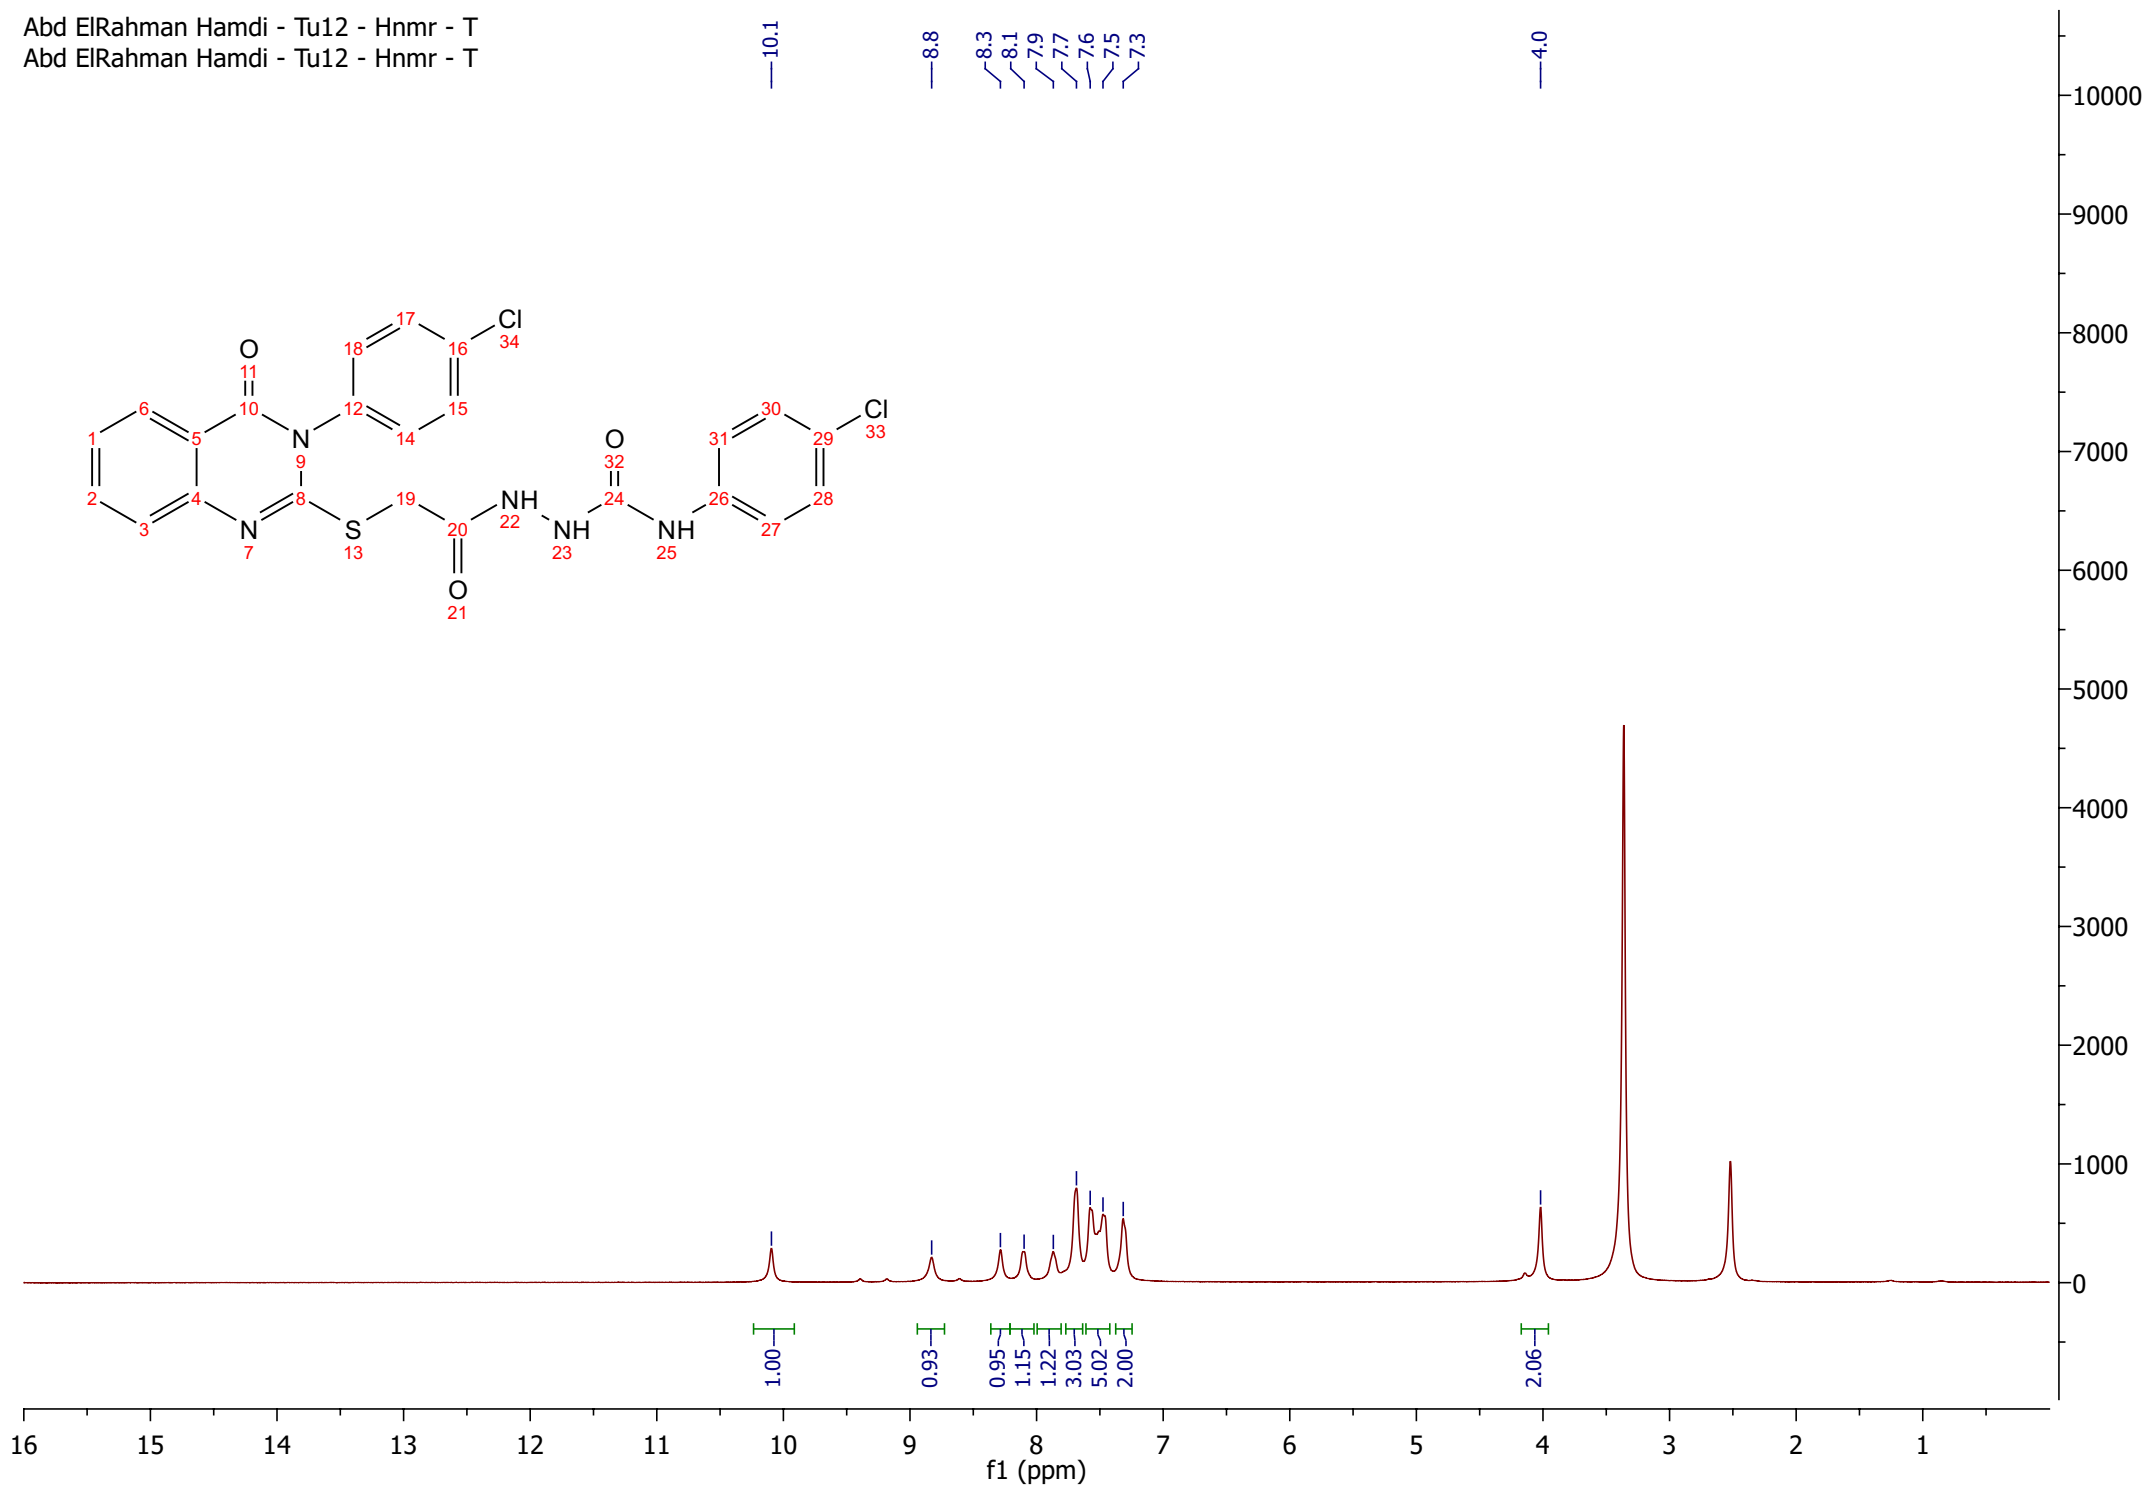

Abdelrahman Hamdy-M1-Hnmr-RR  
Abdelrahman Hamdy-M1-Hnmr-RR

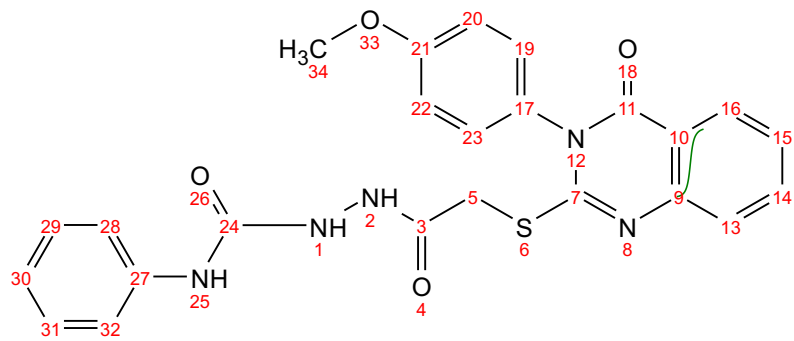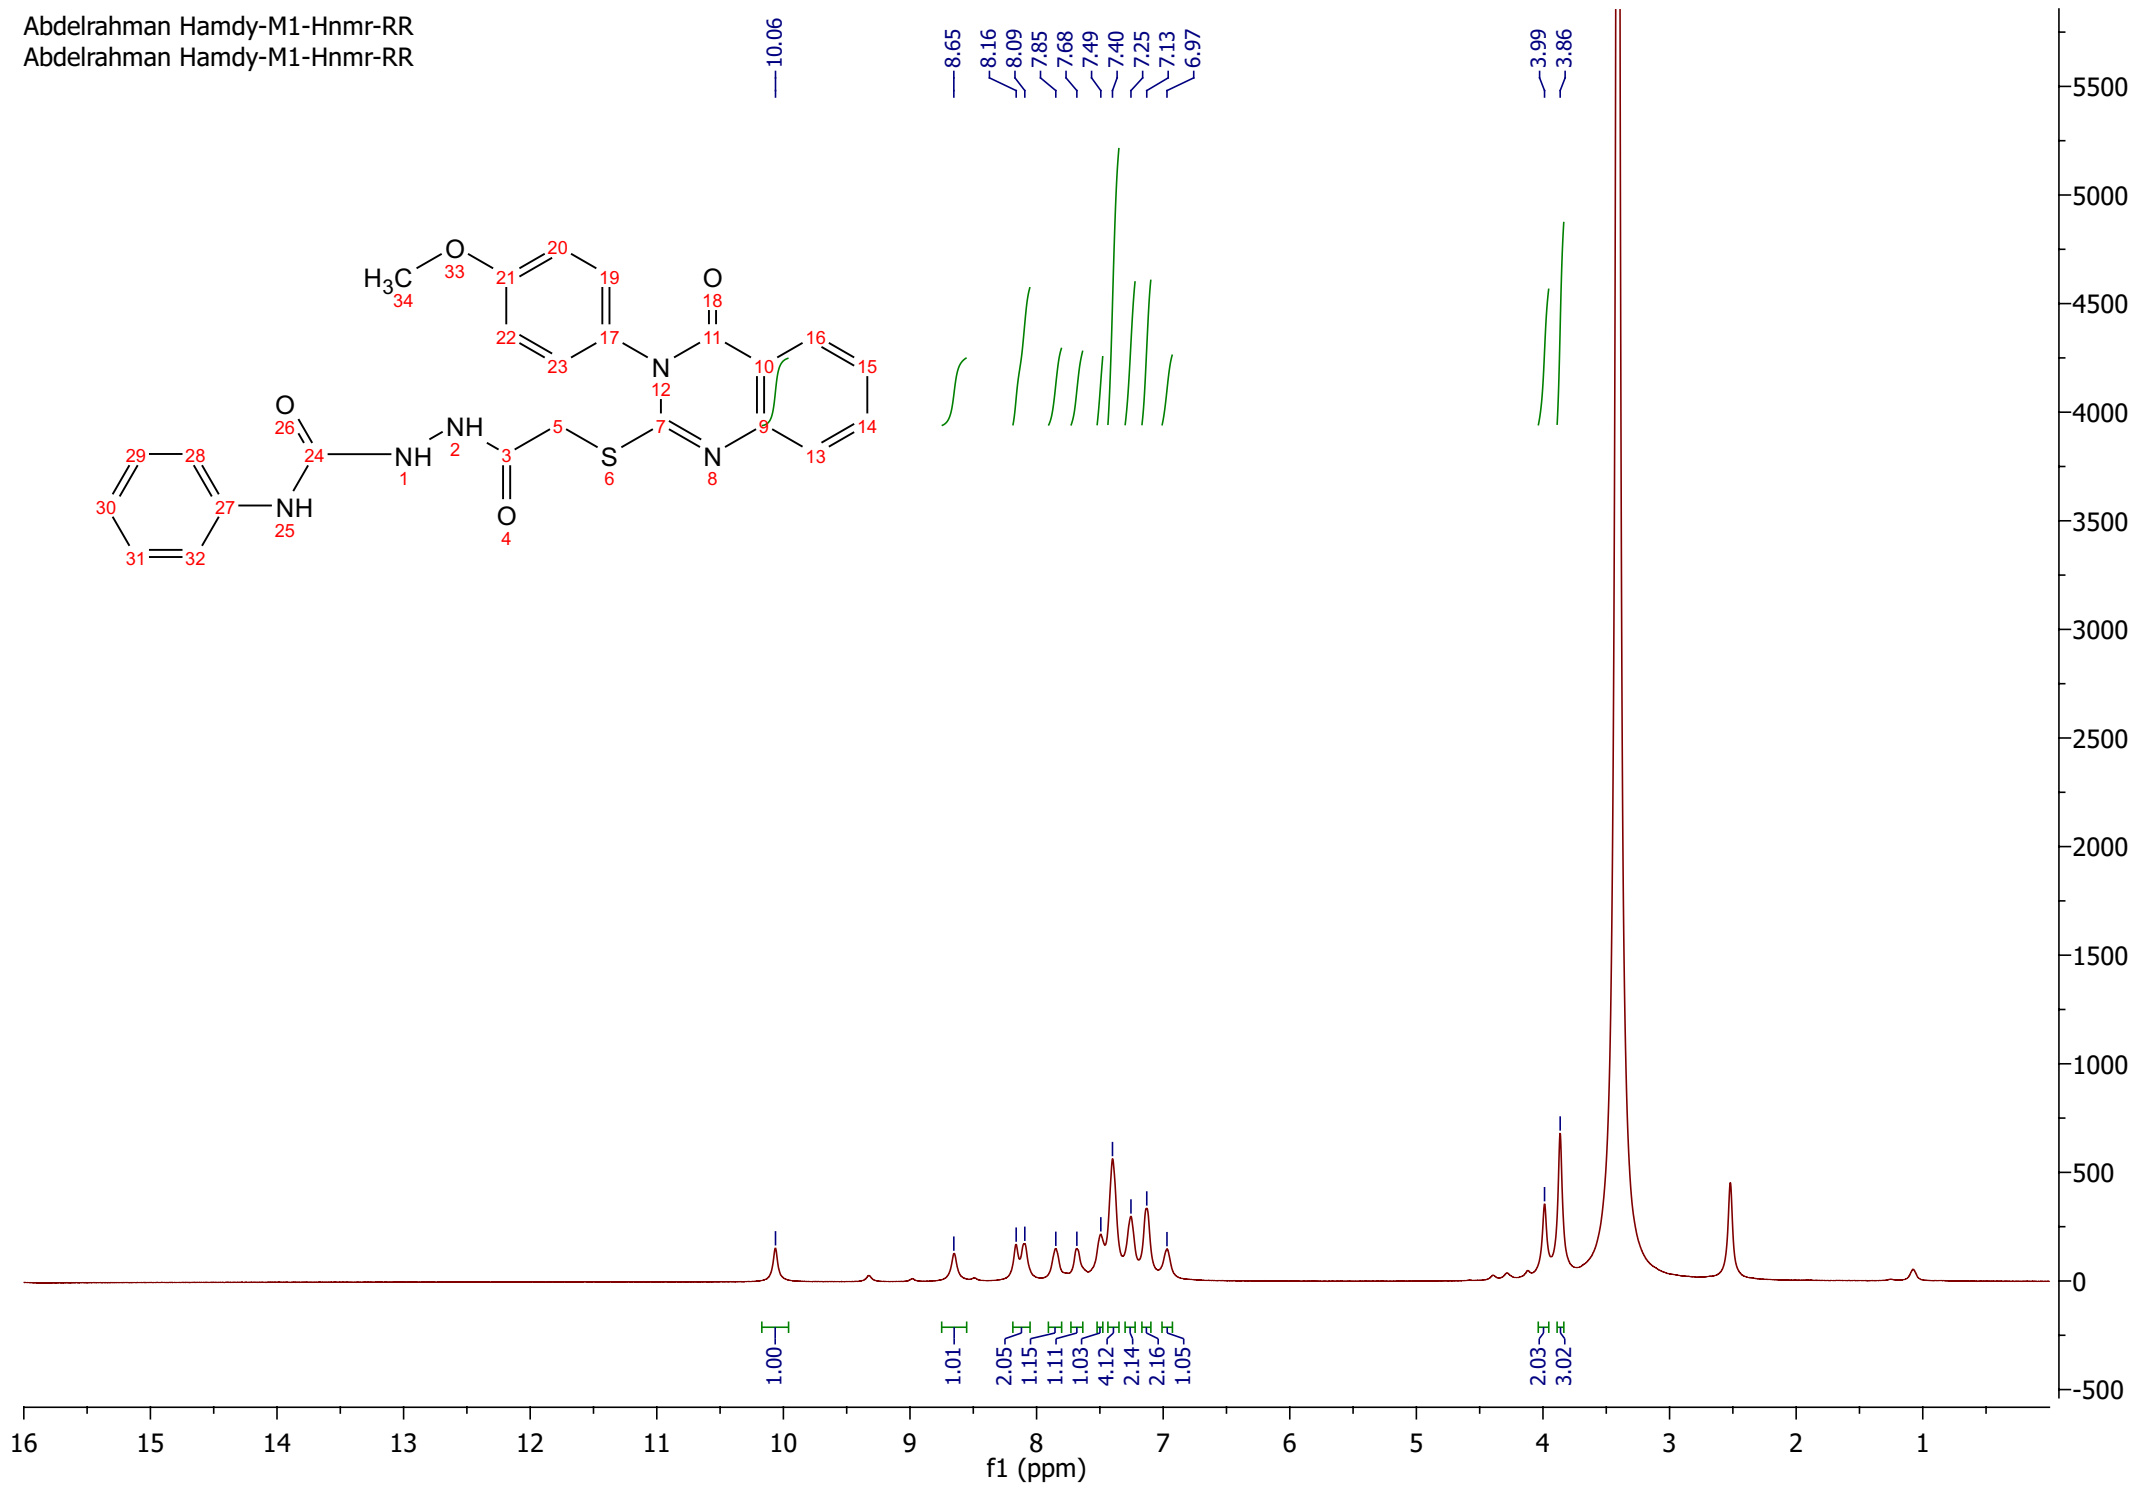

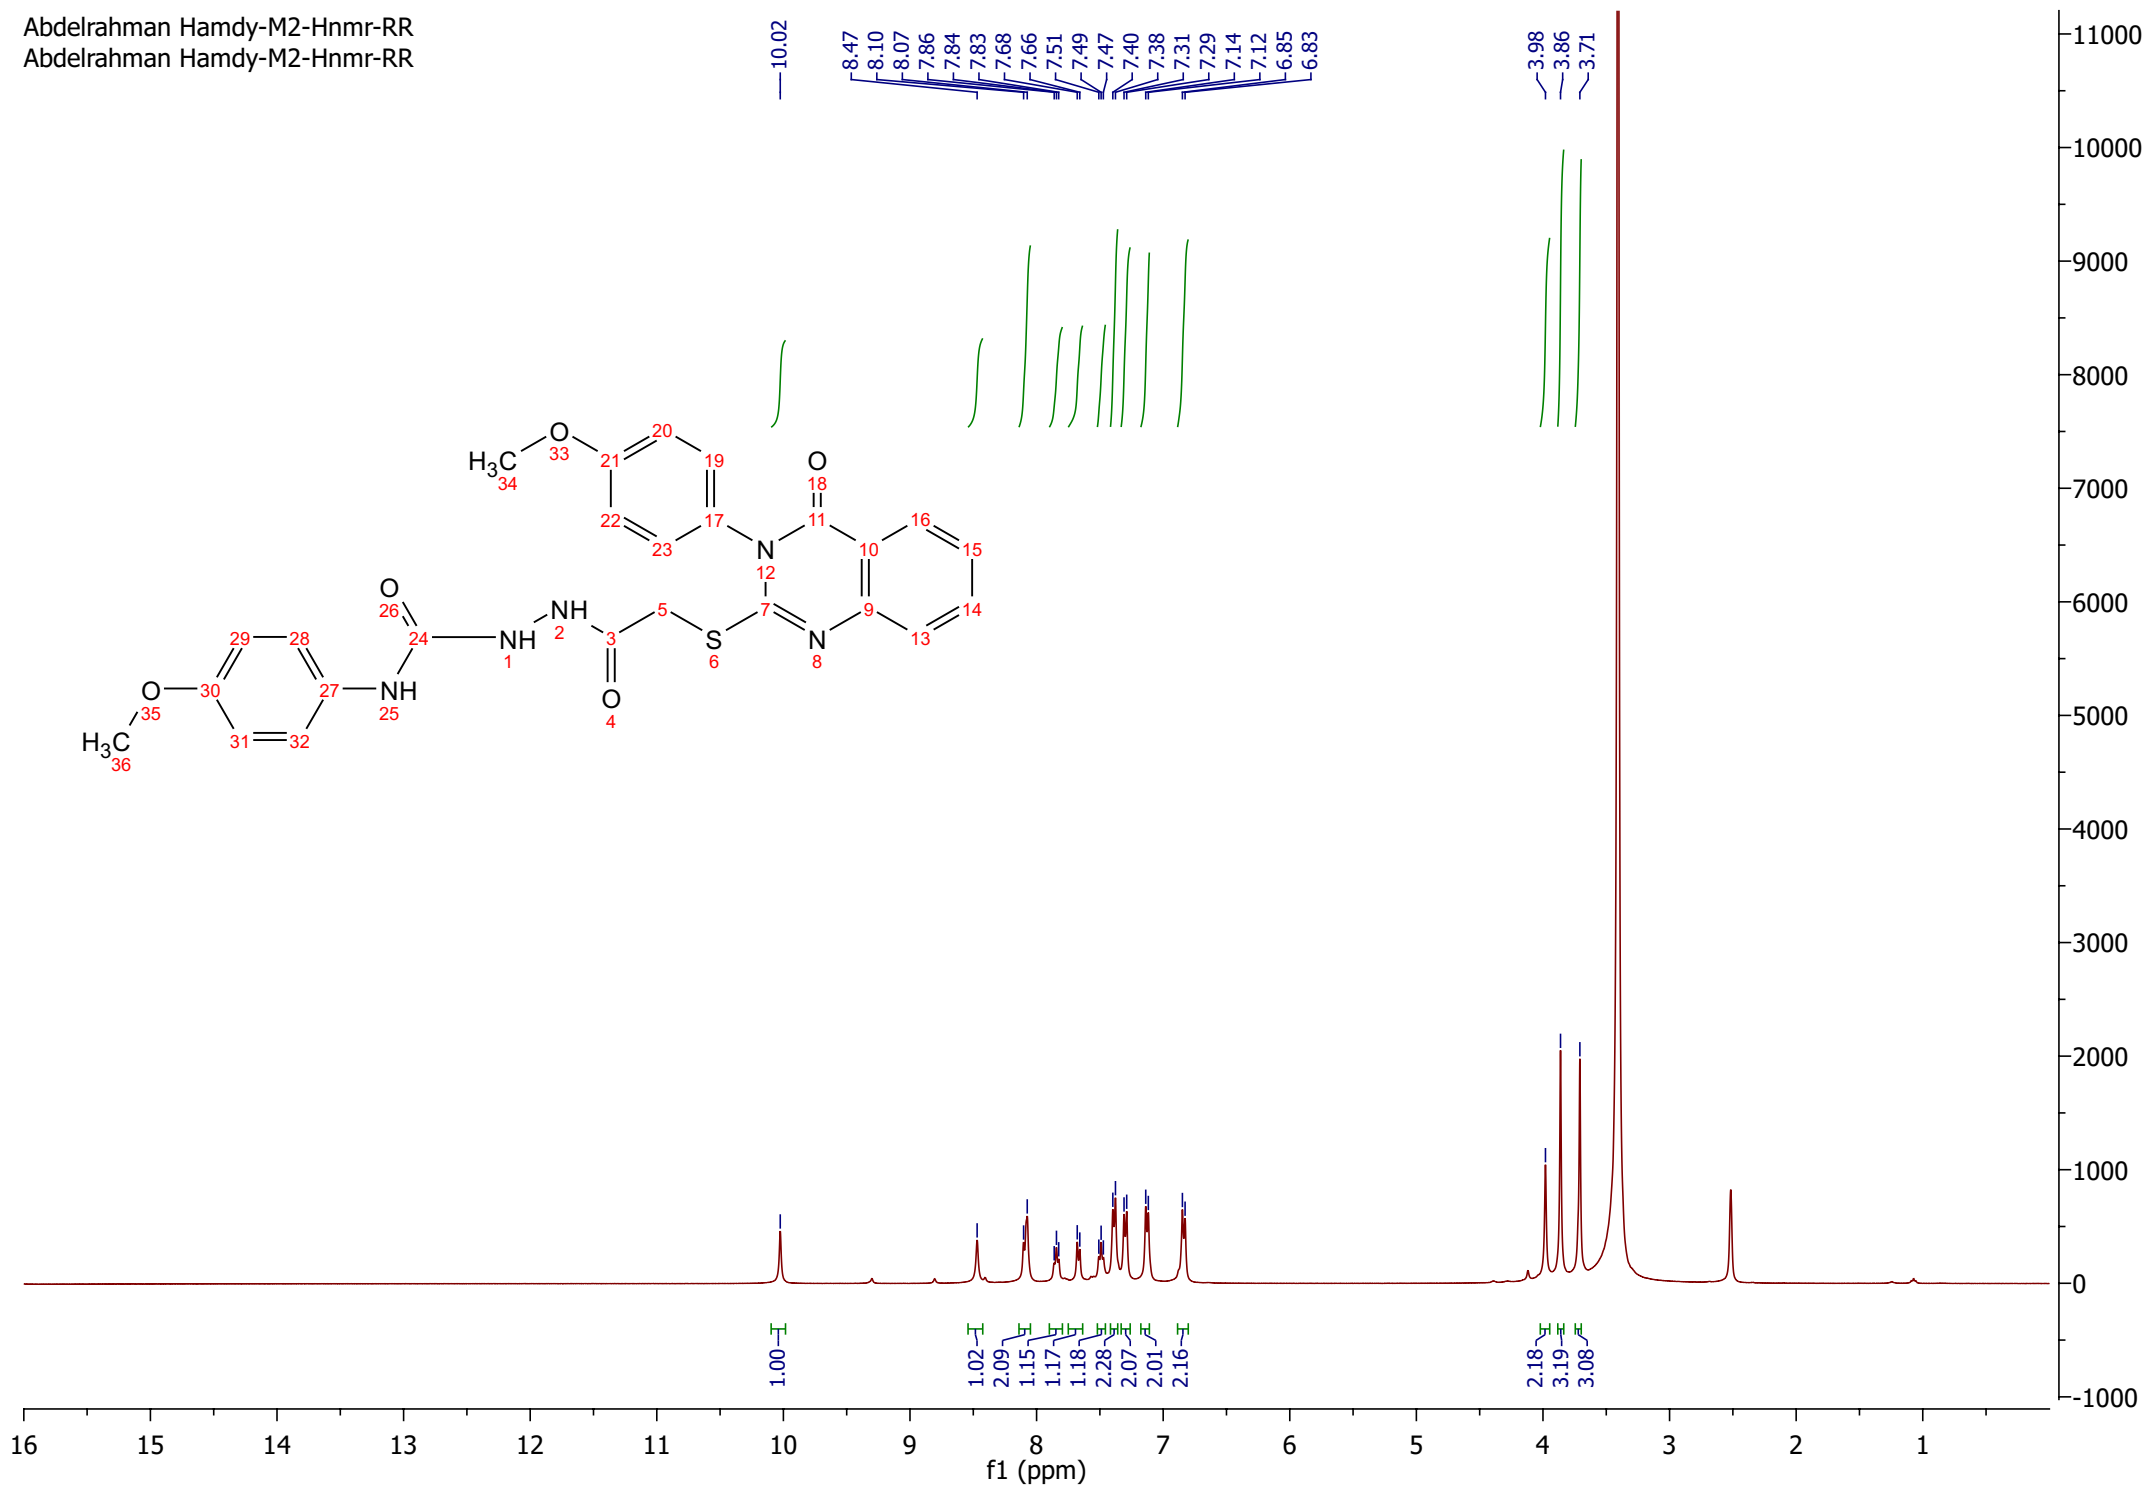

Abdelrahman Hamdy-M3-Hnmr-RR  
Abdelrahman Hamdy-M3-Hnmr-RR

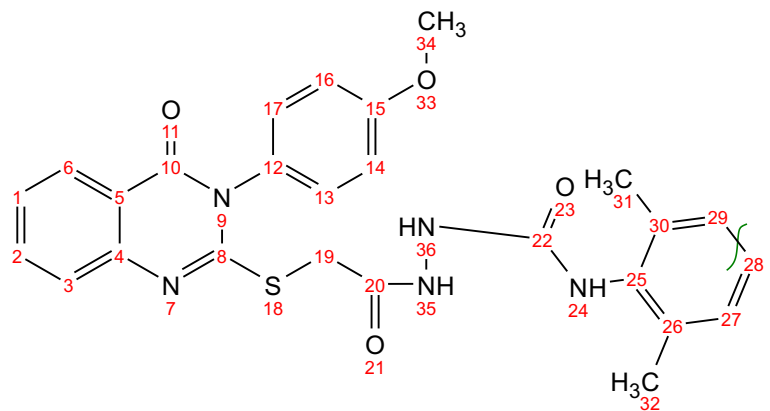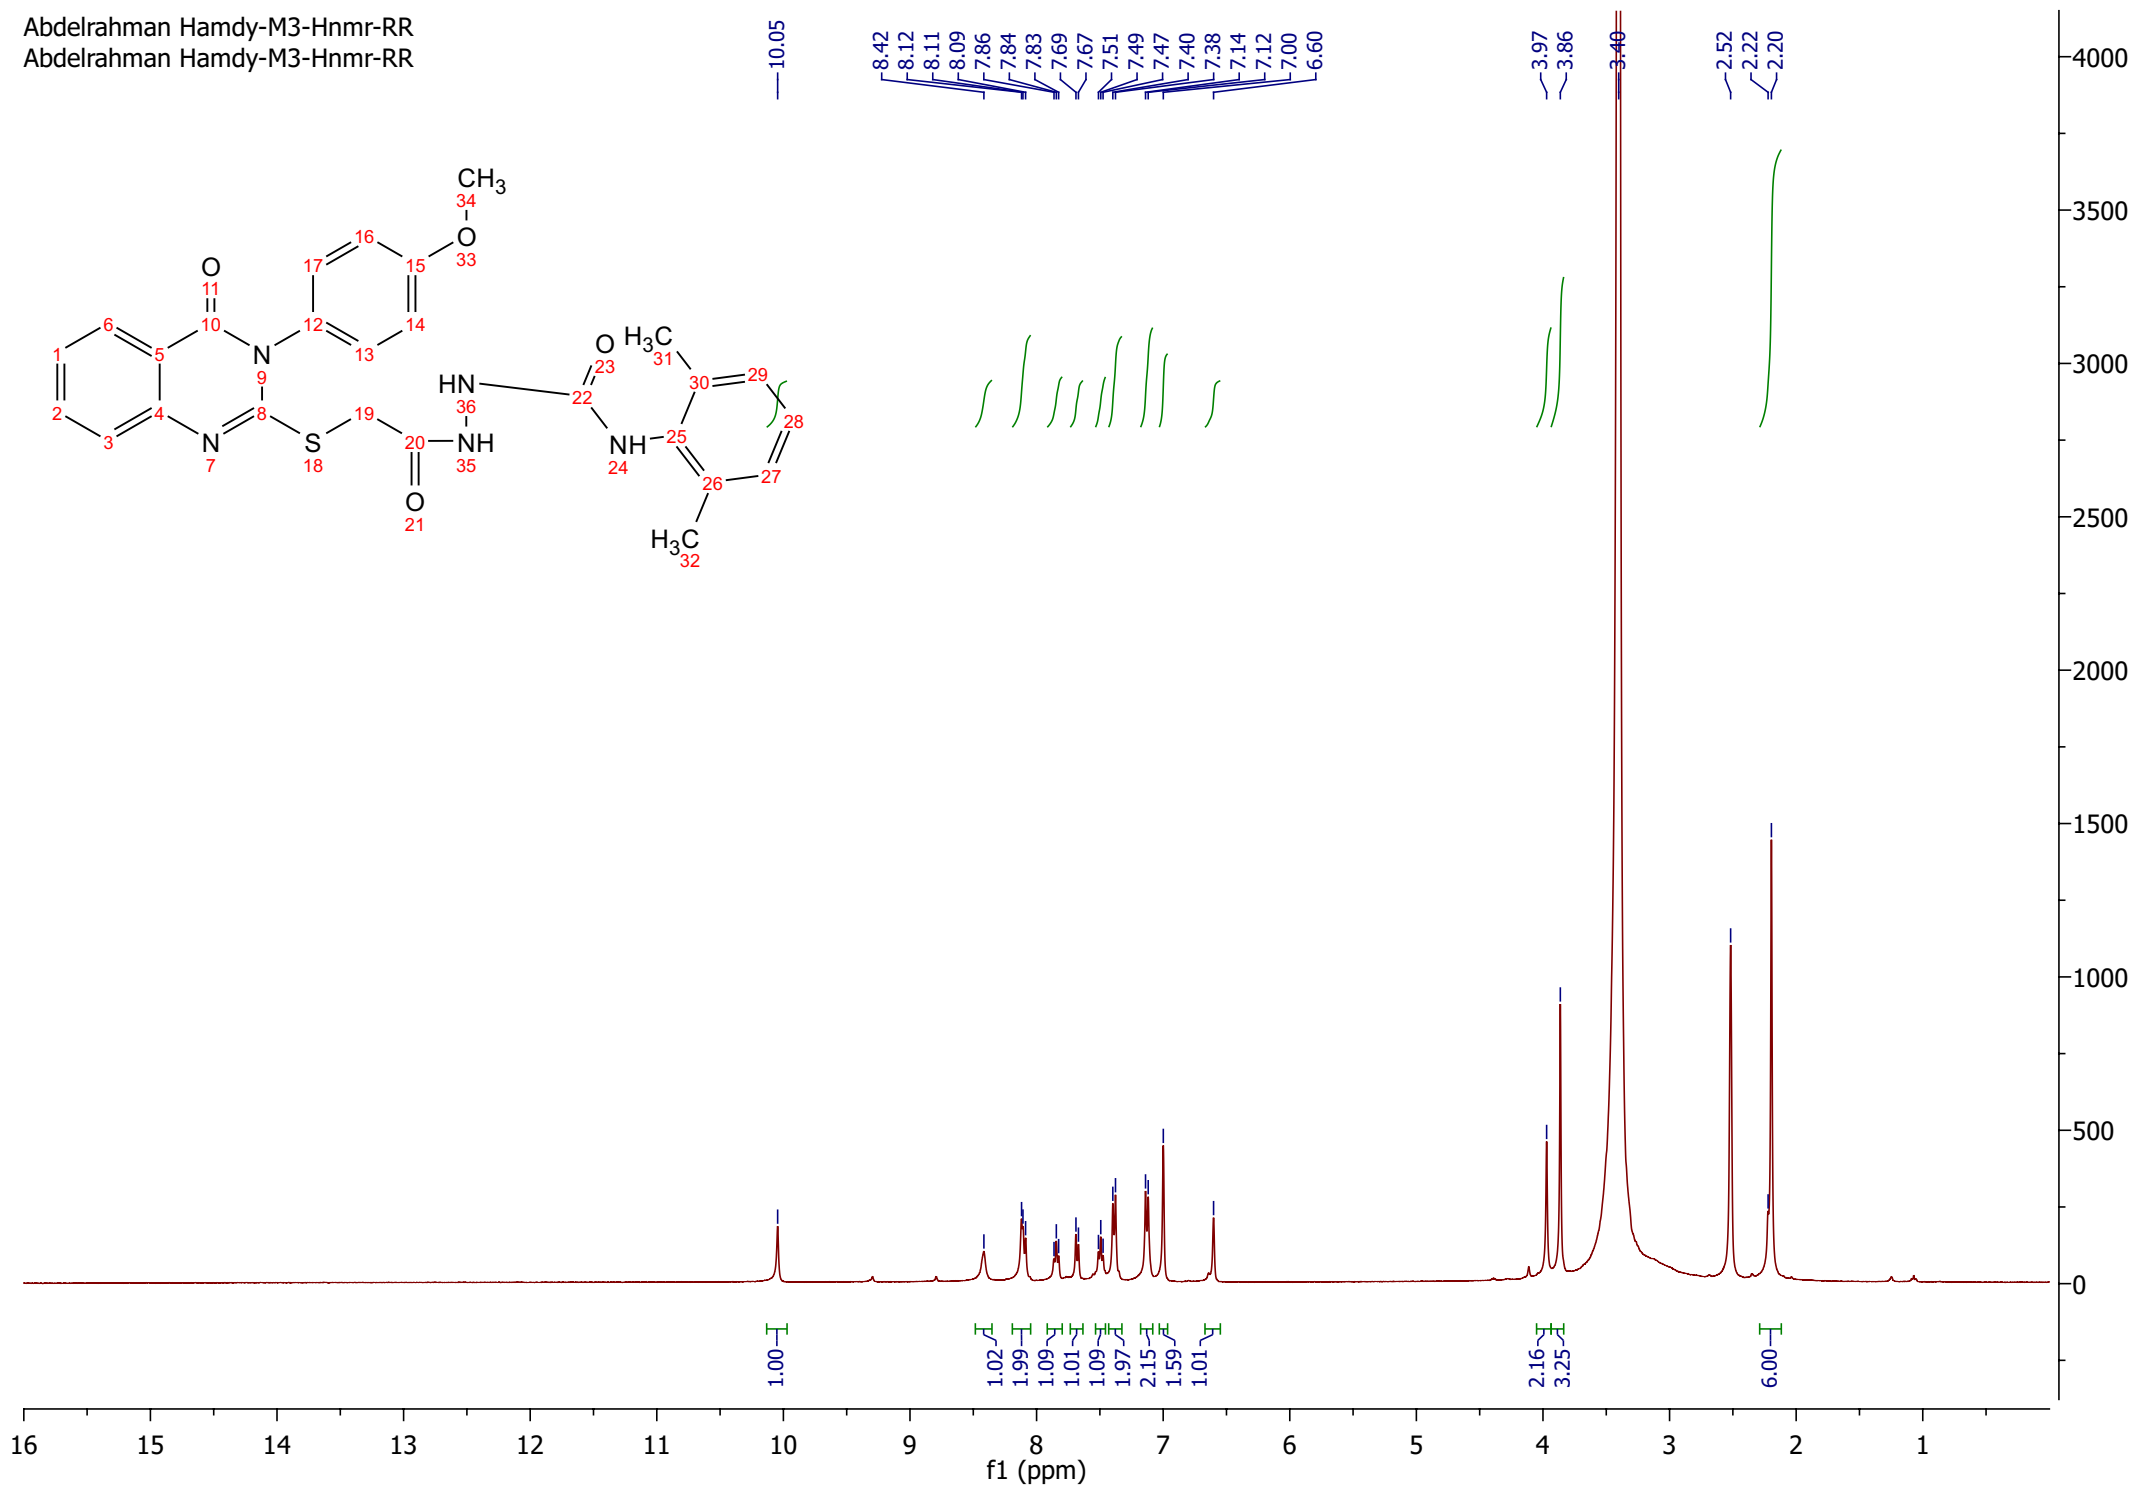



Abdelrahman Hamdy-M4-Hnmr-RR  
Abdelrahman Hamdy-M4-Hnmr-RR

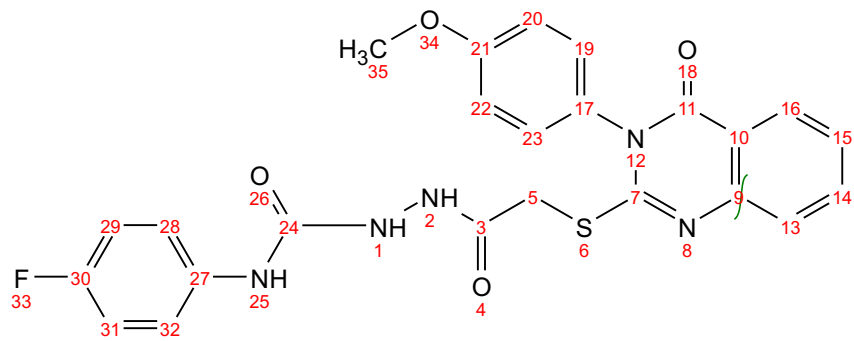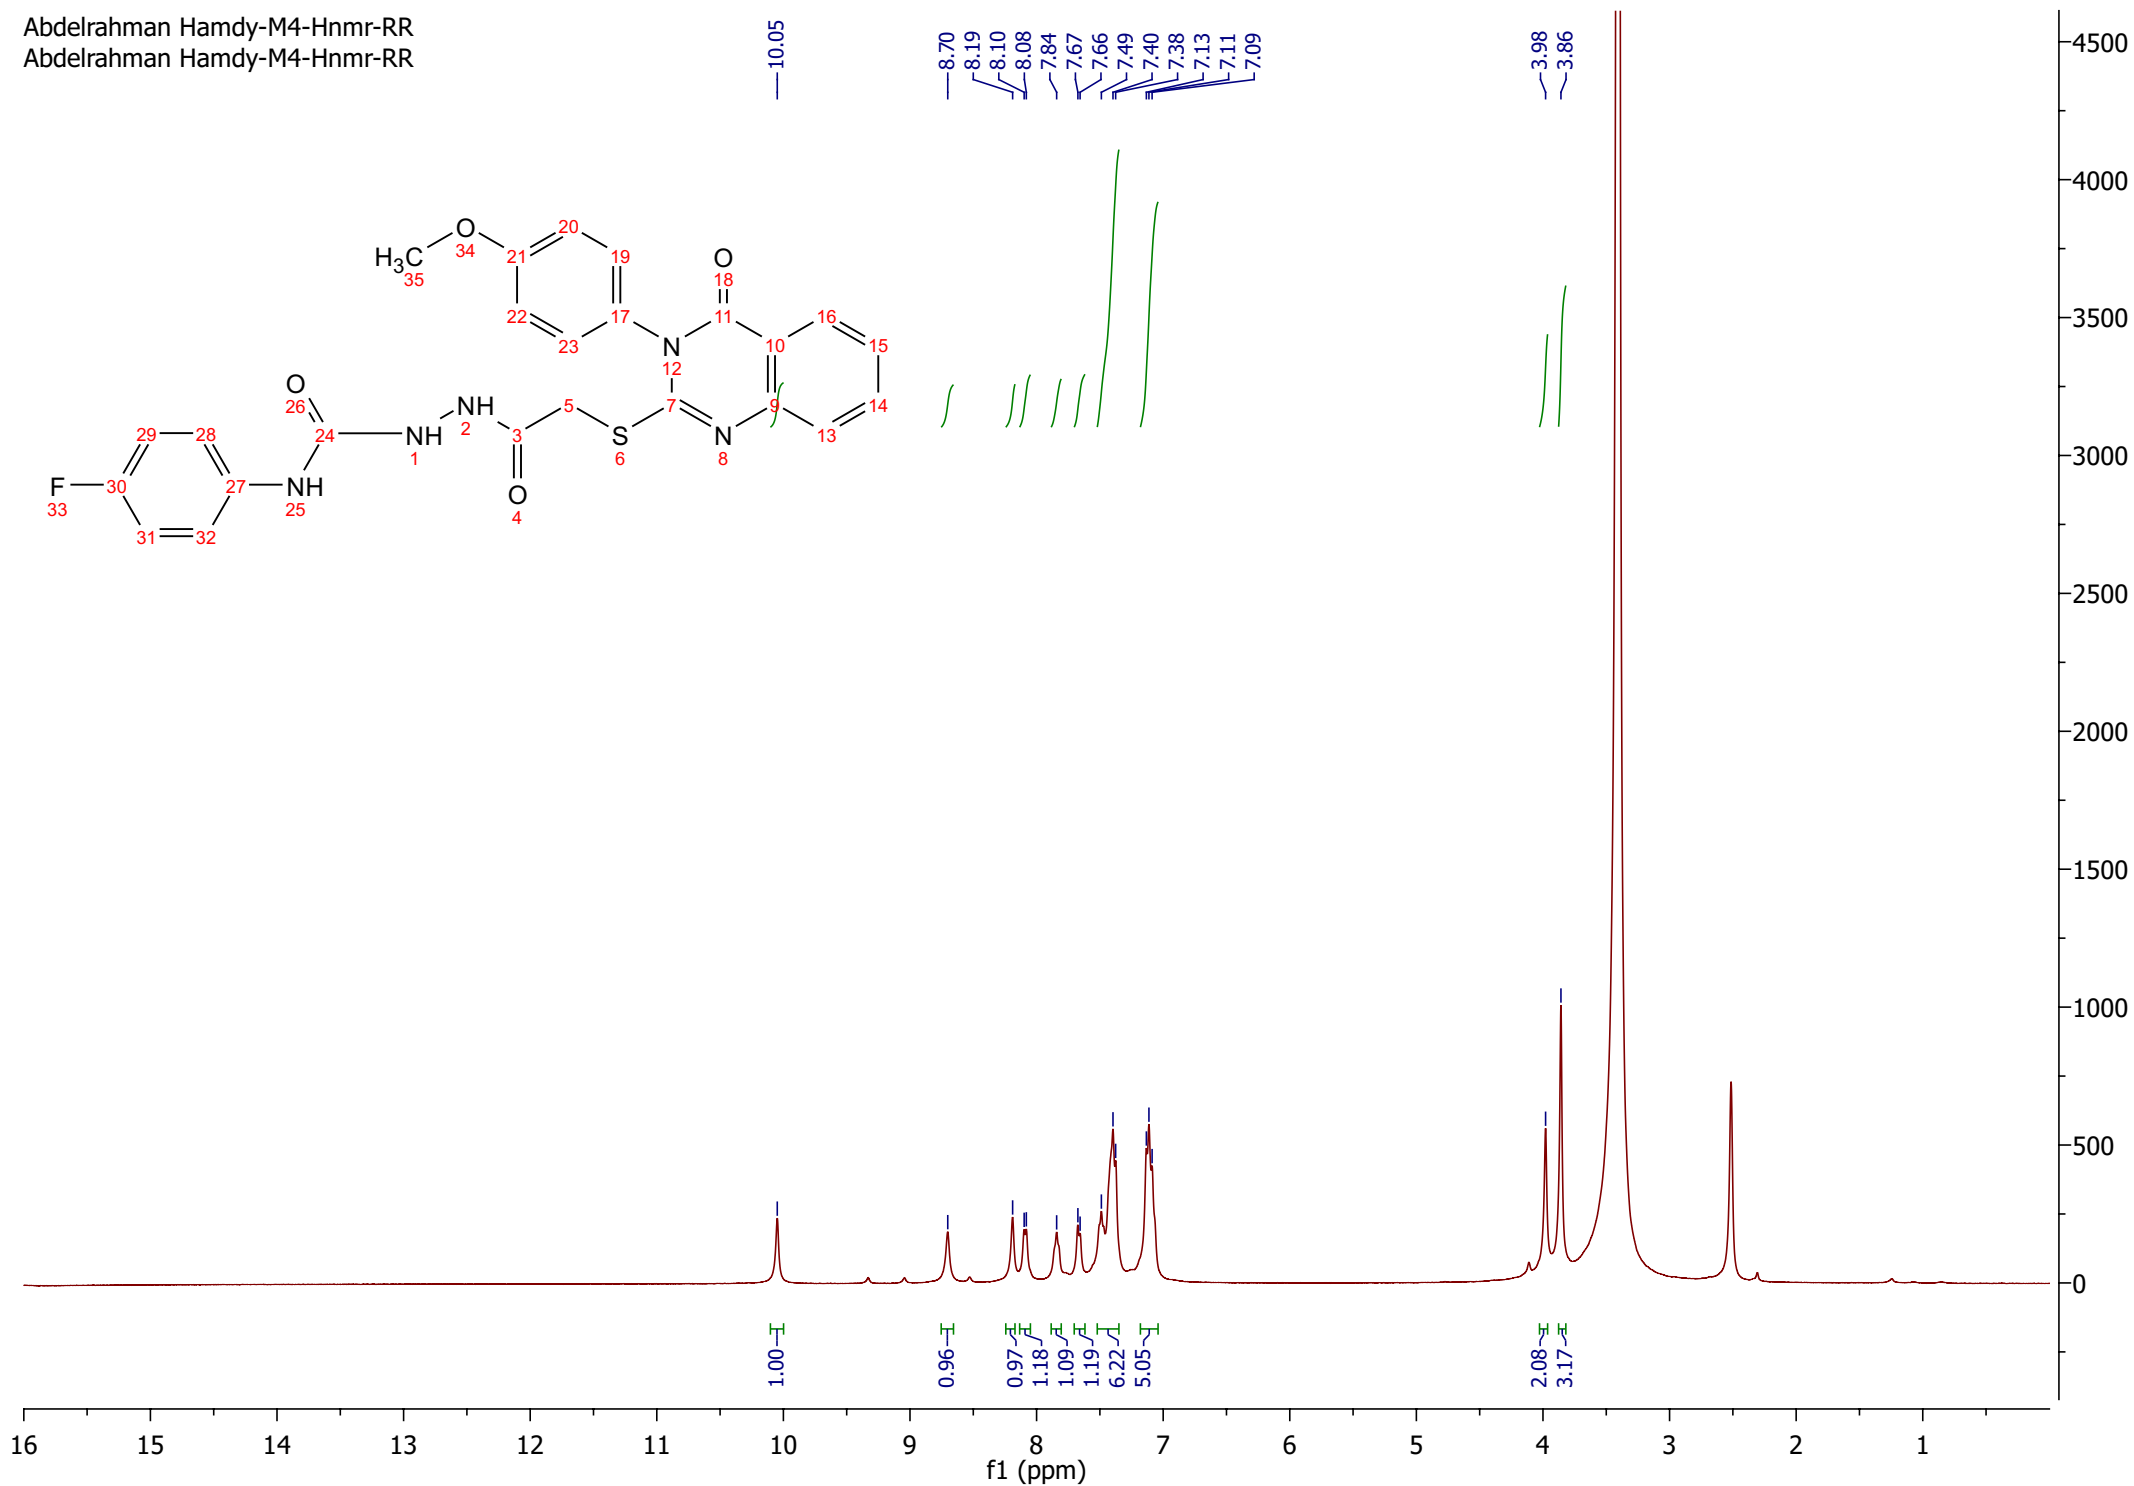

Abdelrahman Hamdy-M6-Hnmr-RR  
Abdelrahman Hamdy-M6-Hnmr-RR

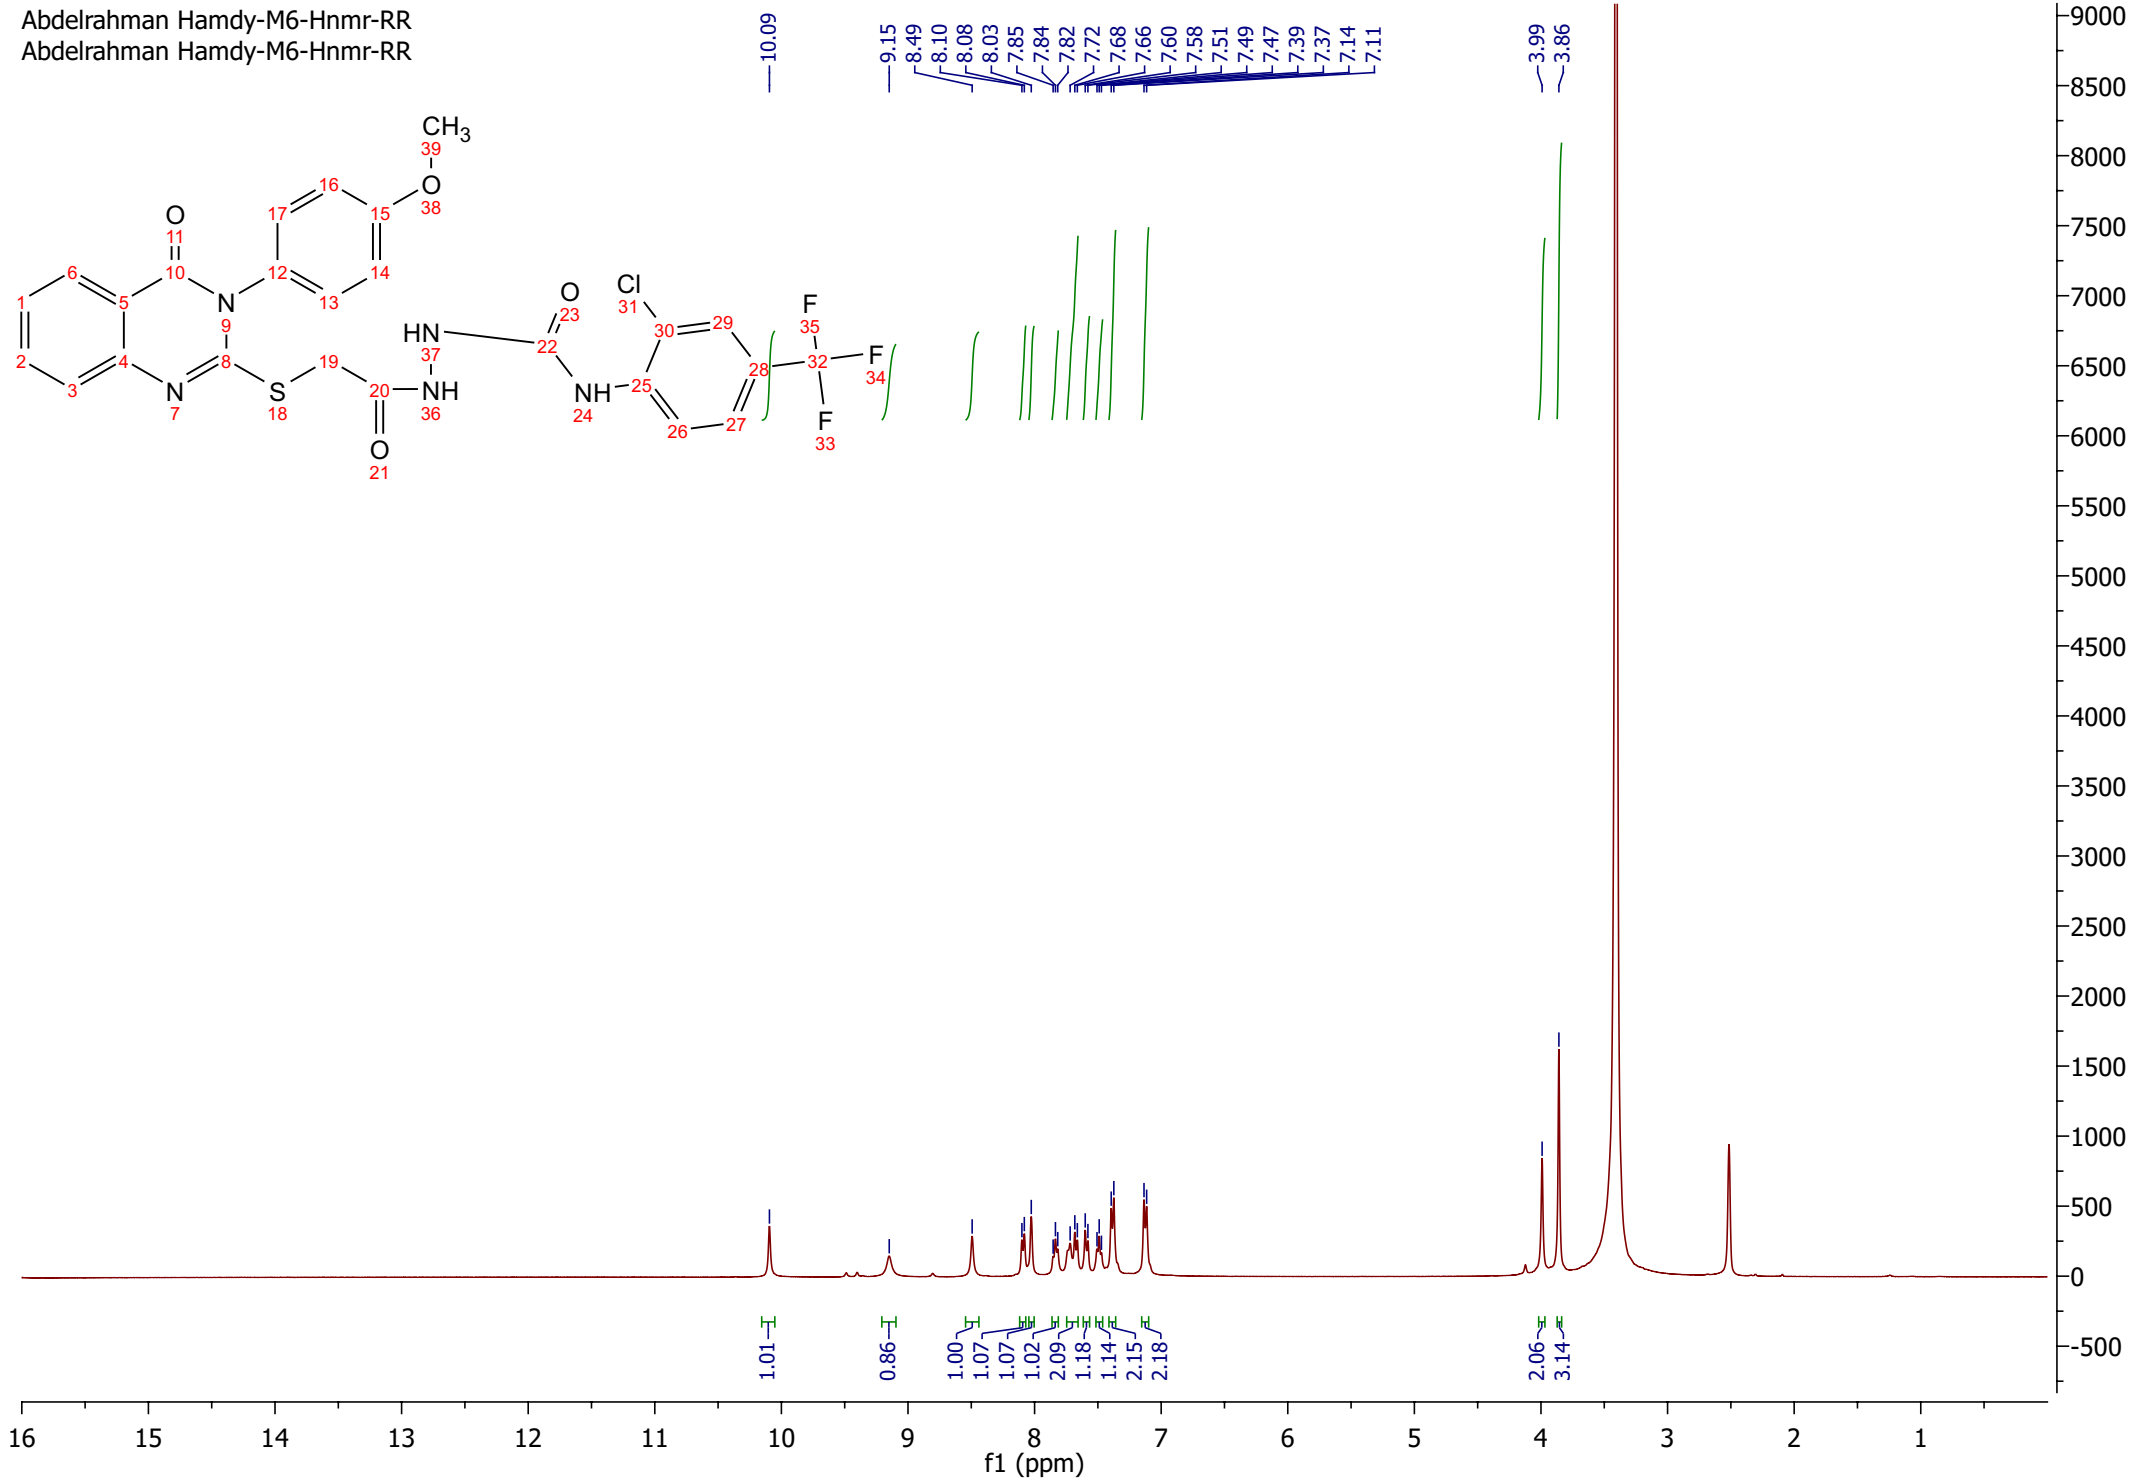

Abdelrahman Hamdy-M7-Hnmr-RR  
Abdelrahman Hamdy-M7-Hnmr-RR

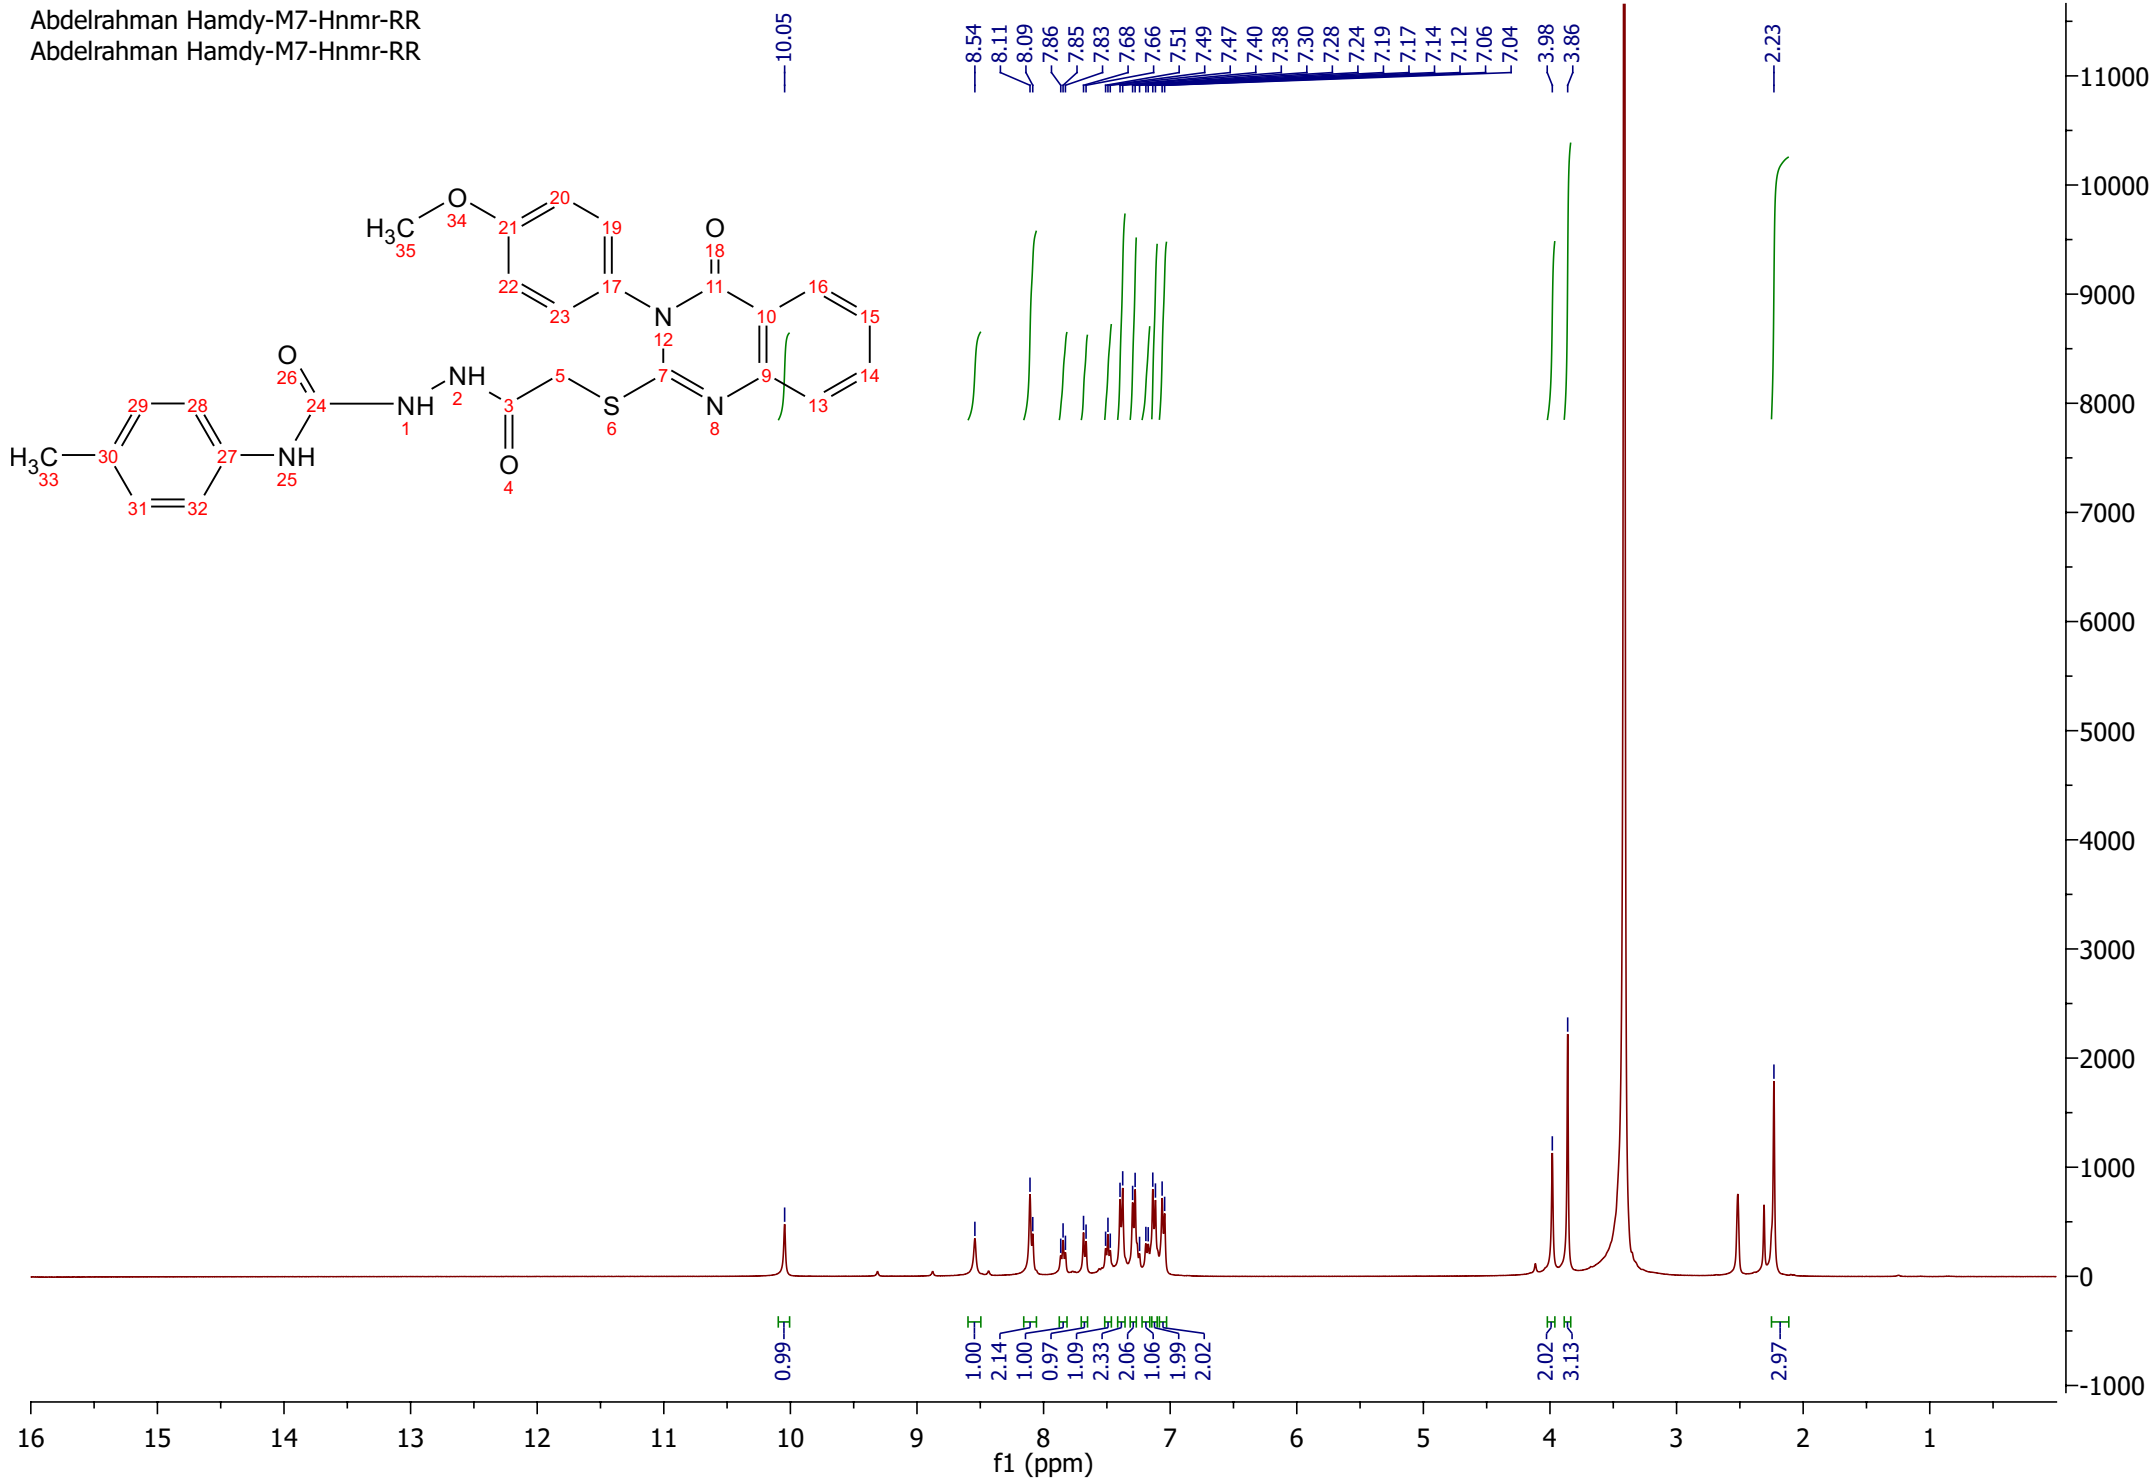

Abdelrahman Hamdy-M8-Hnmr-RR  
Abdelrahman Hamdy-M8-Hnmr-RR

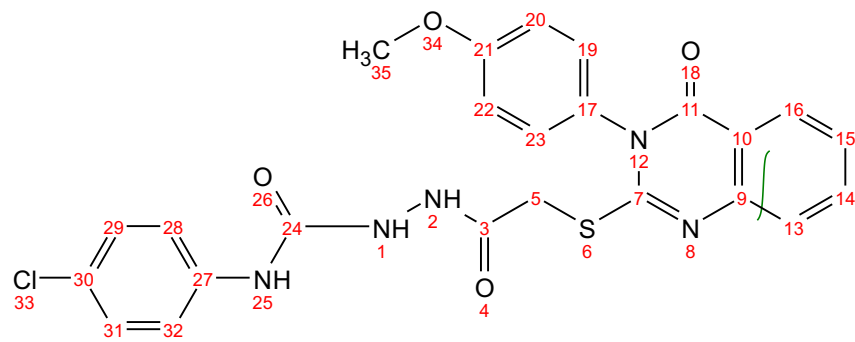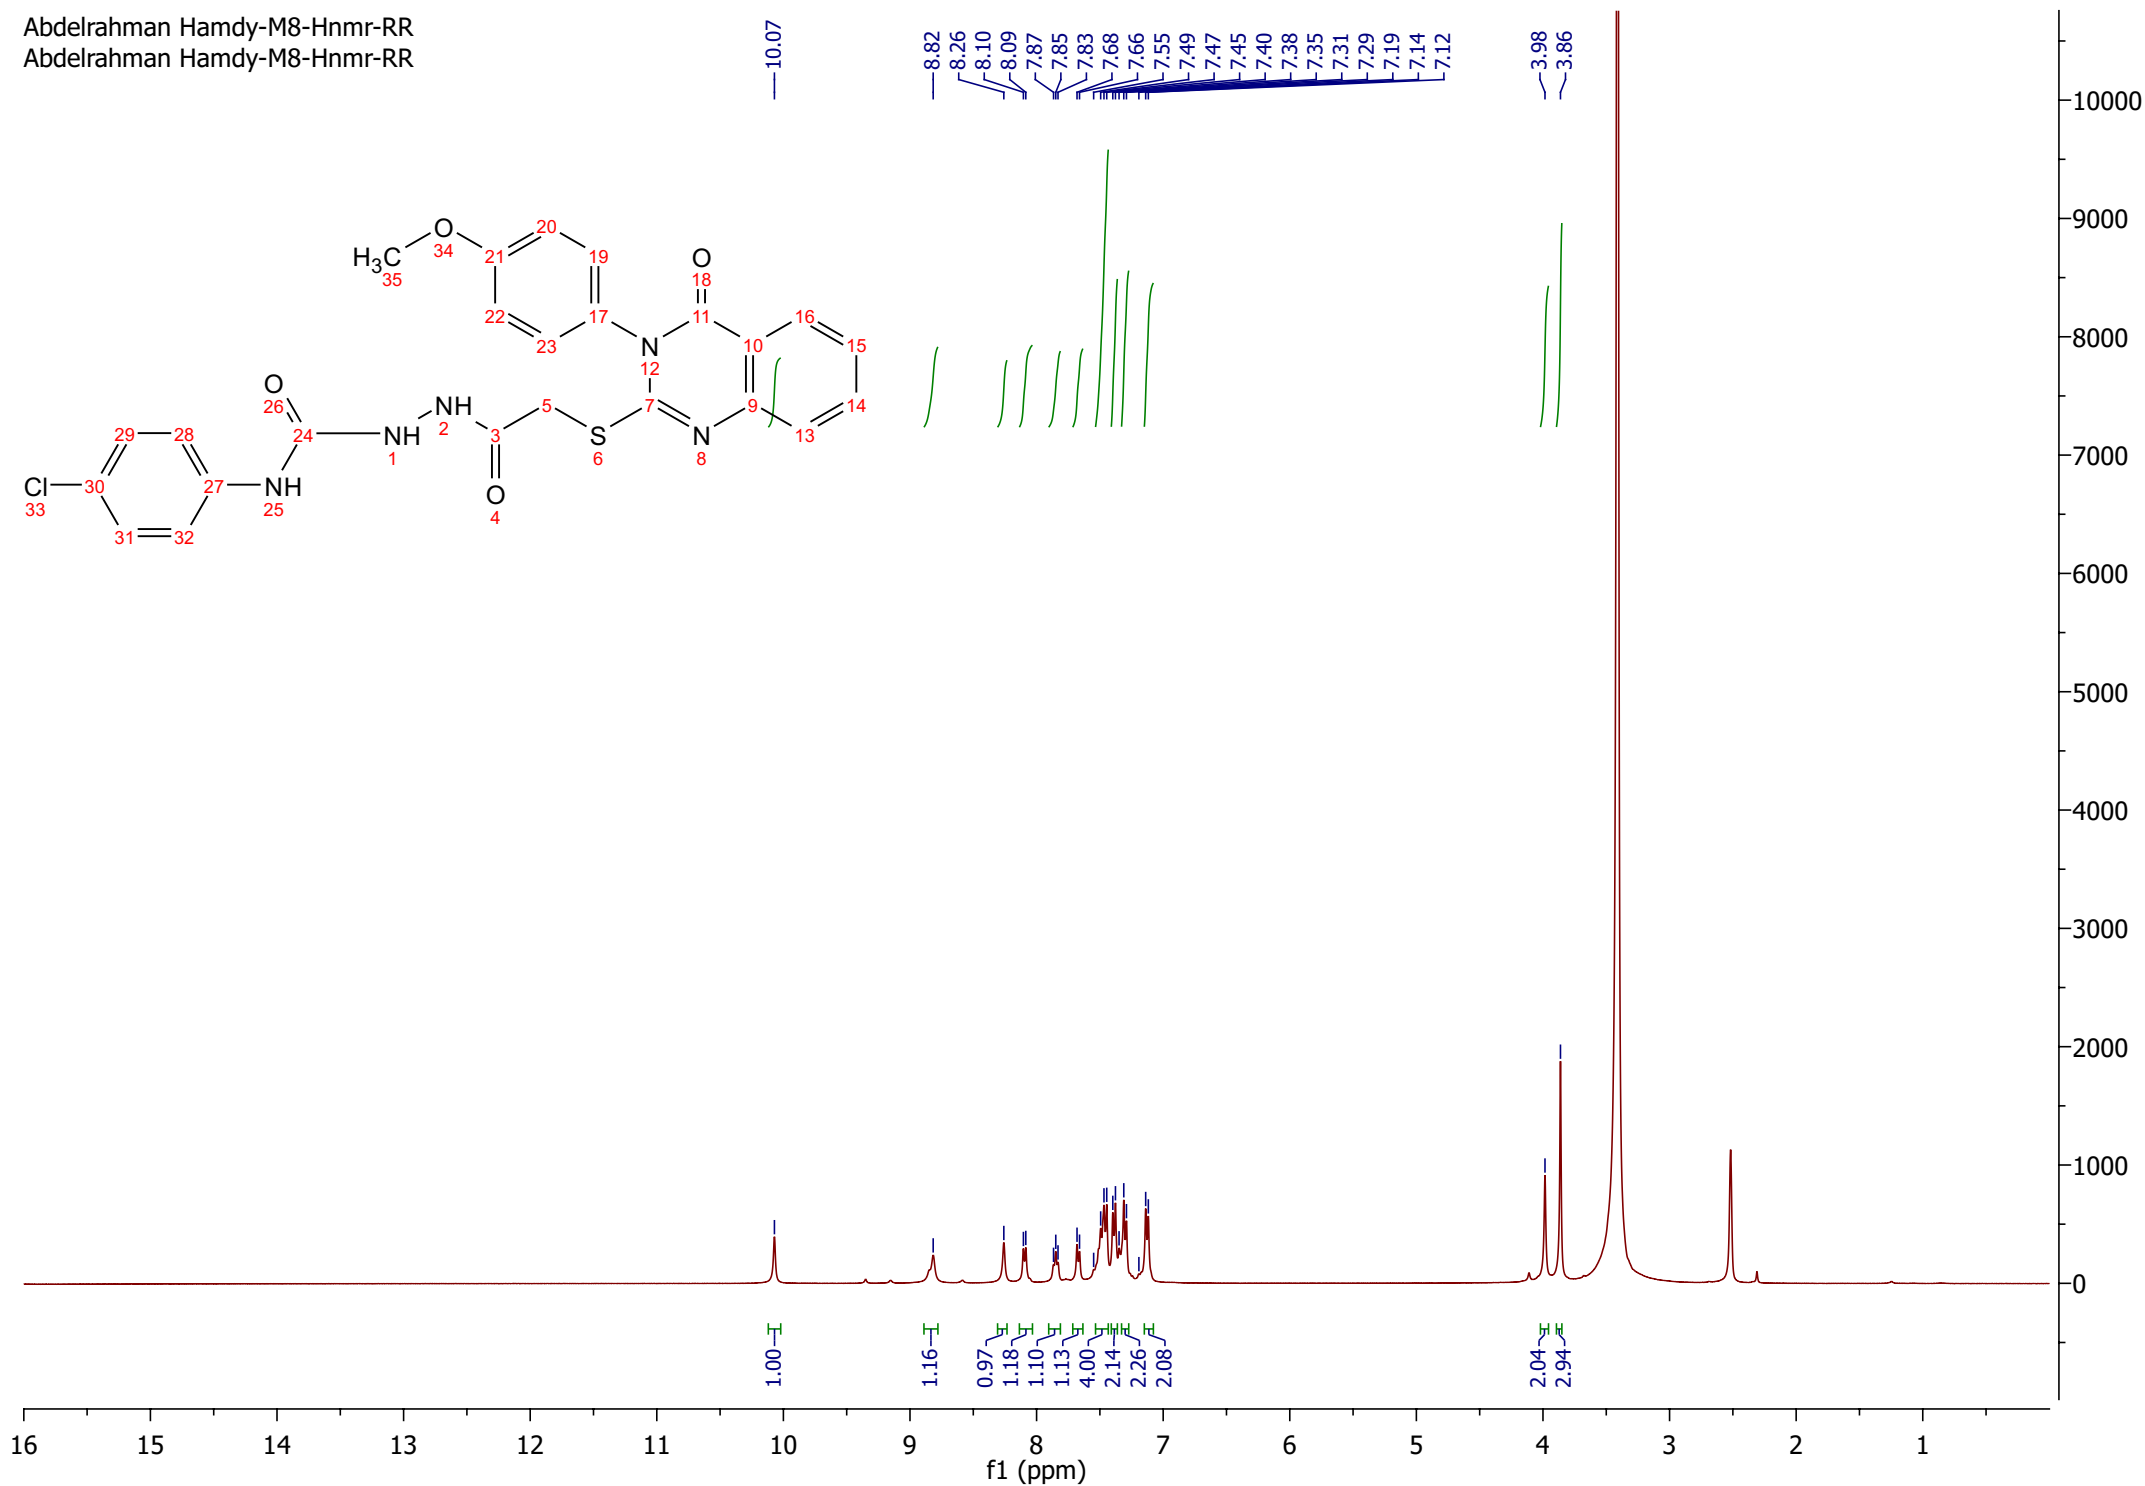

Abdel Rahman Hamdy-H2-DMSO-d6-13Cmp-A  
Abdel Rahman Hamdy-H2-DMSO-d6-13Cmp-A

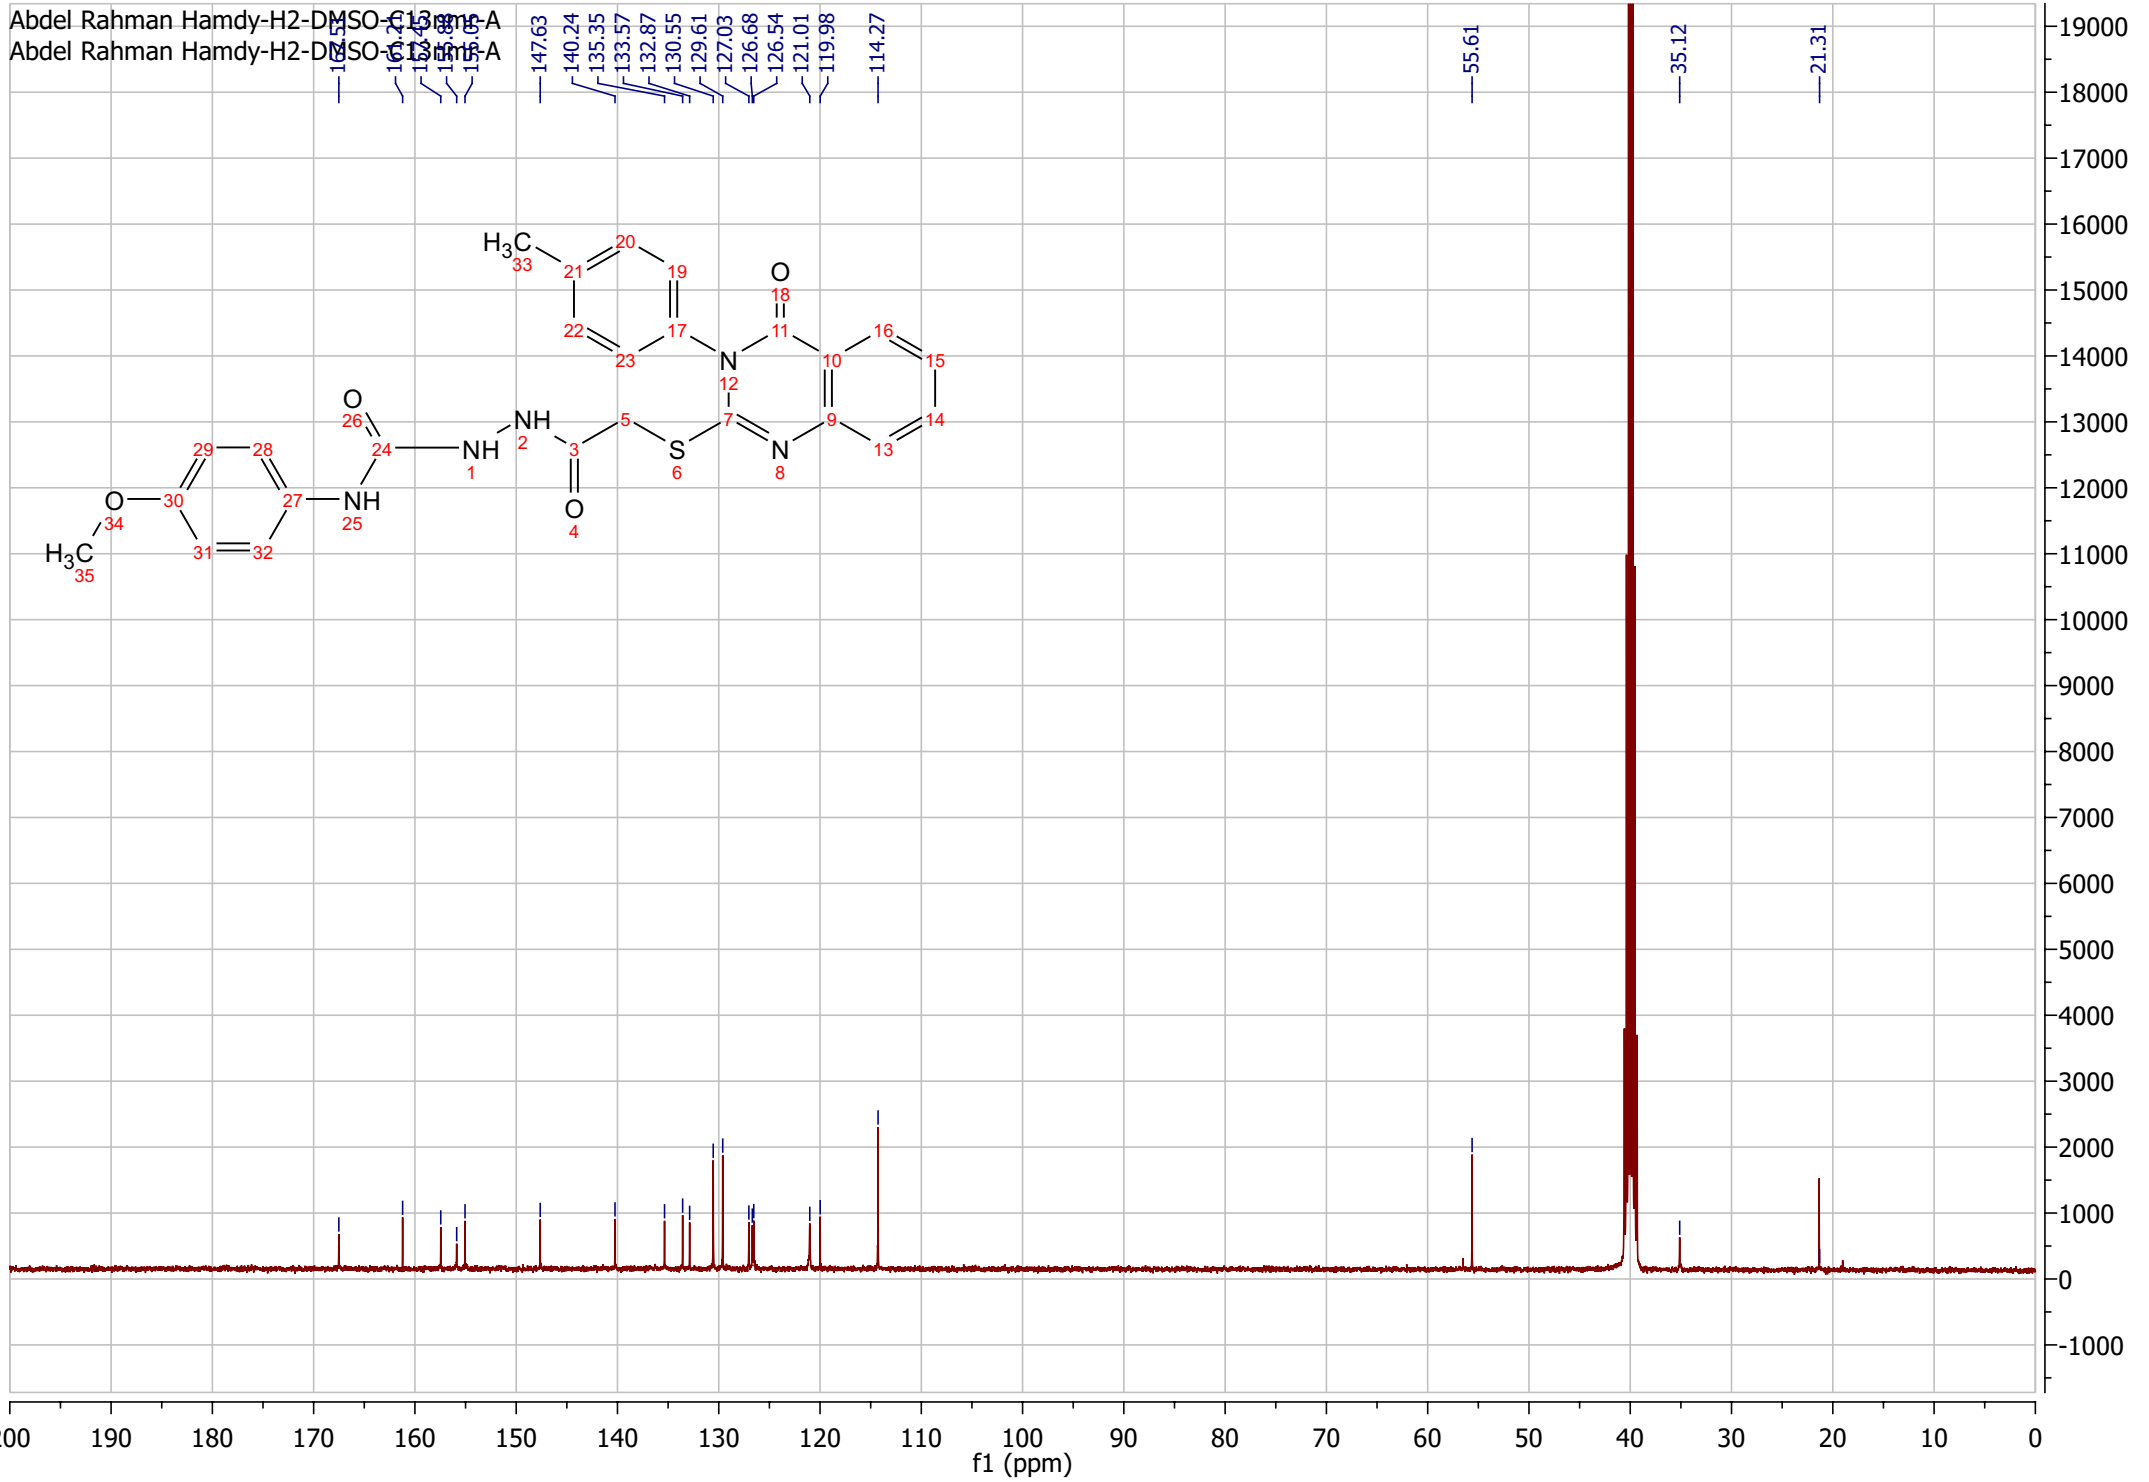

Abdel Rahman Hamdy-H3-DMSO-C13 nmr-A  
Abdel Rahman Hamdy-H3-DMSO-C13 nmr-A

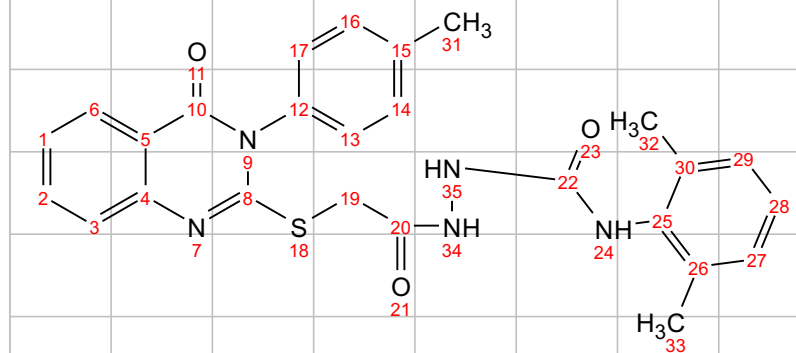

147.64  
140.26  
139.66  
138.01  
135.36  
133.55  
130.56  
129.60  
127.03  
126.69  
126.57  
124.11  
119.99  
116.85

35.06  
21.55  
21.35

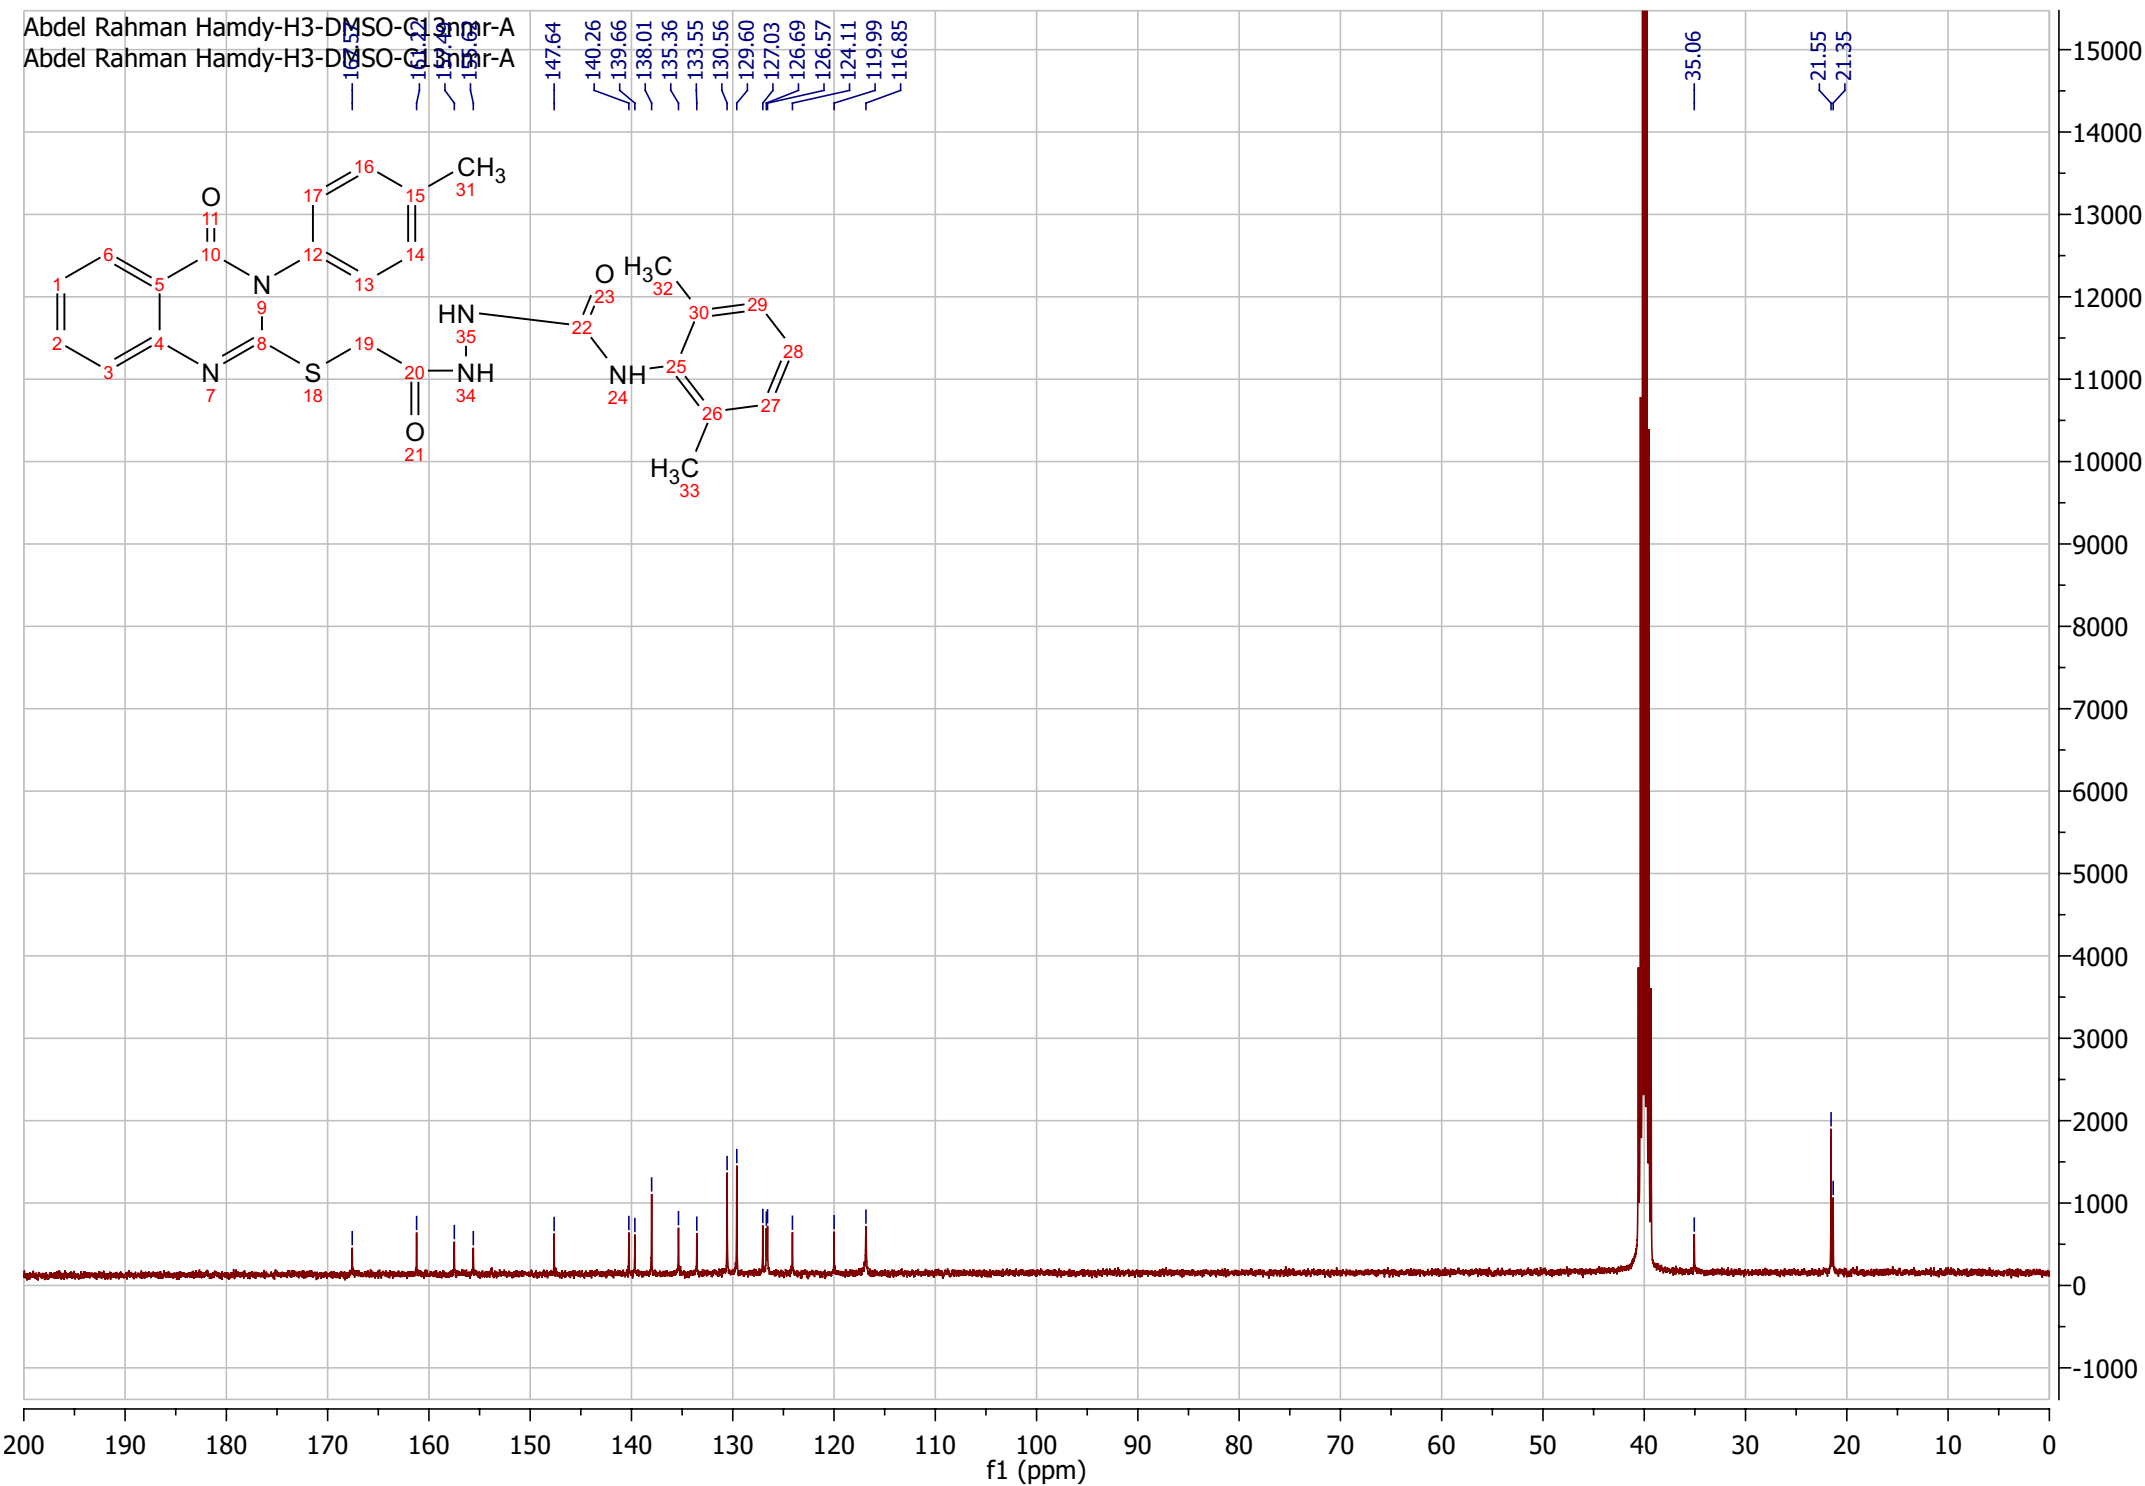

Abdel Rahman Hamdy-H4-DMSO-G13nrr-A  
Abdel Rahman Hamdy-H4-DMSO-G13nrr-A

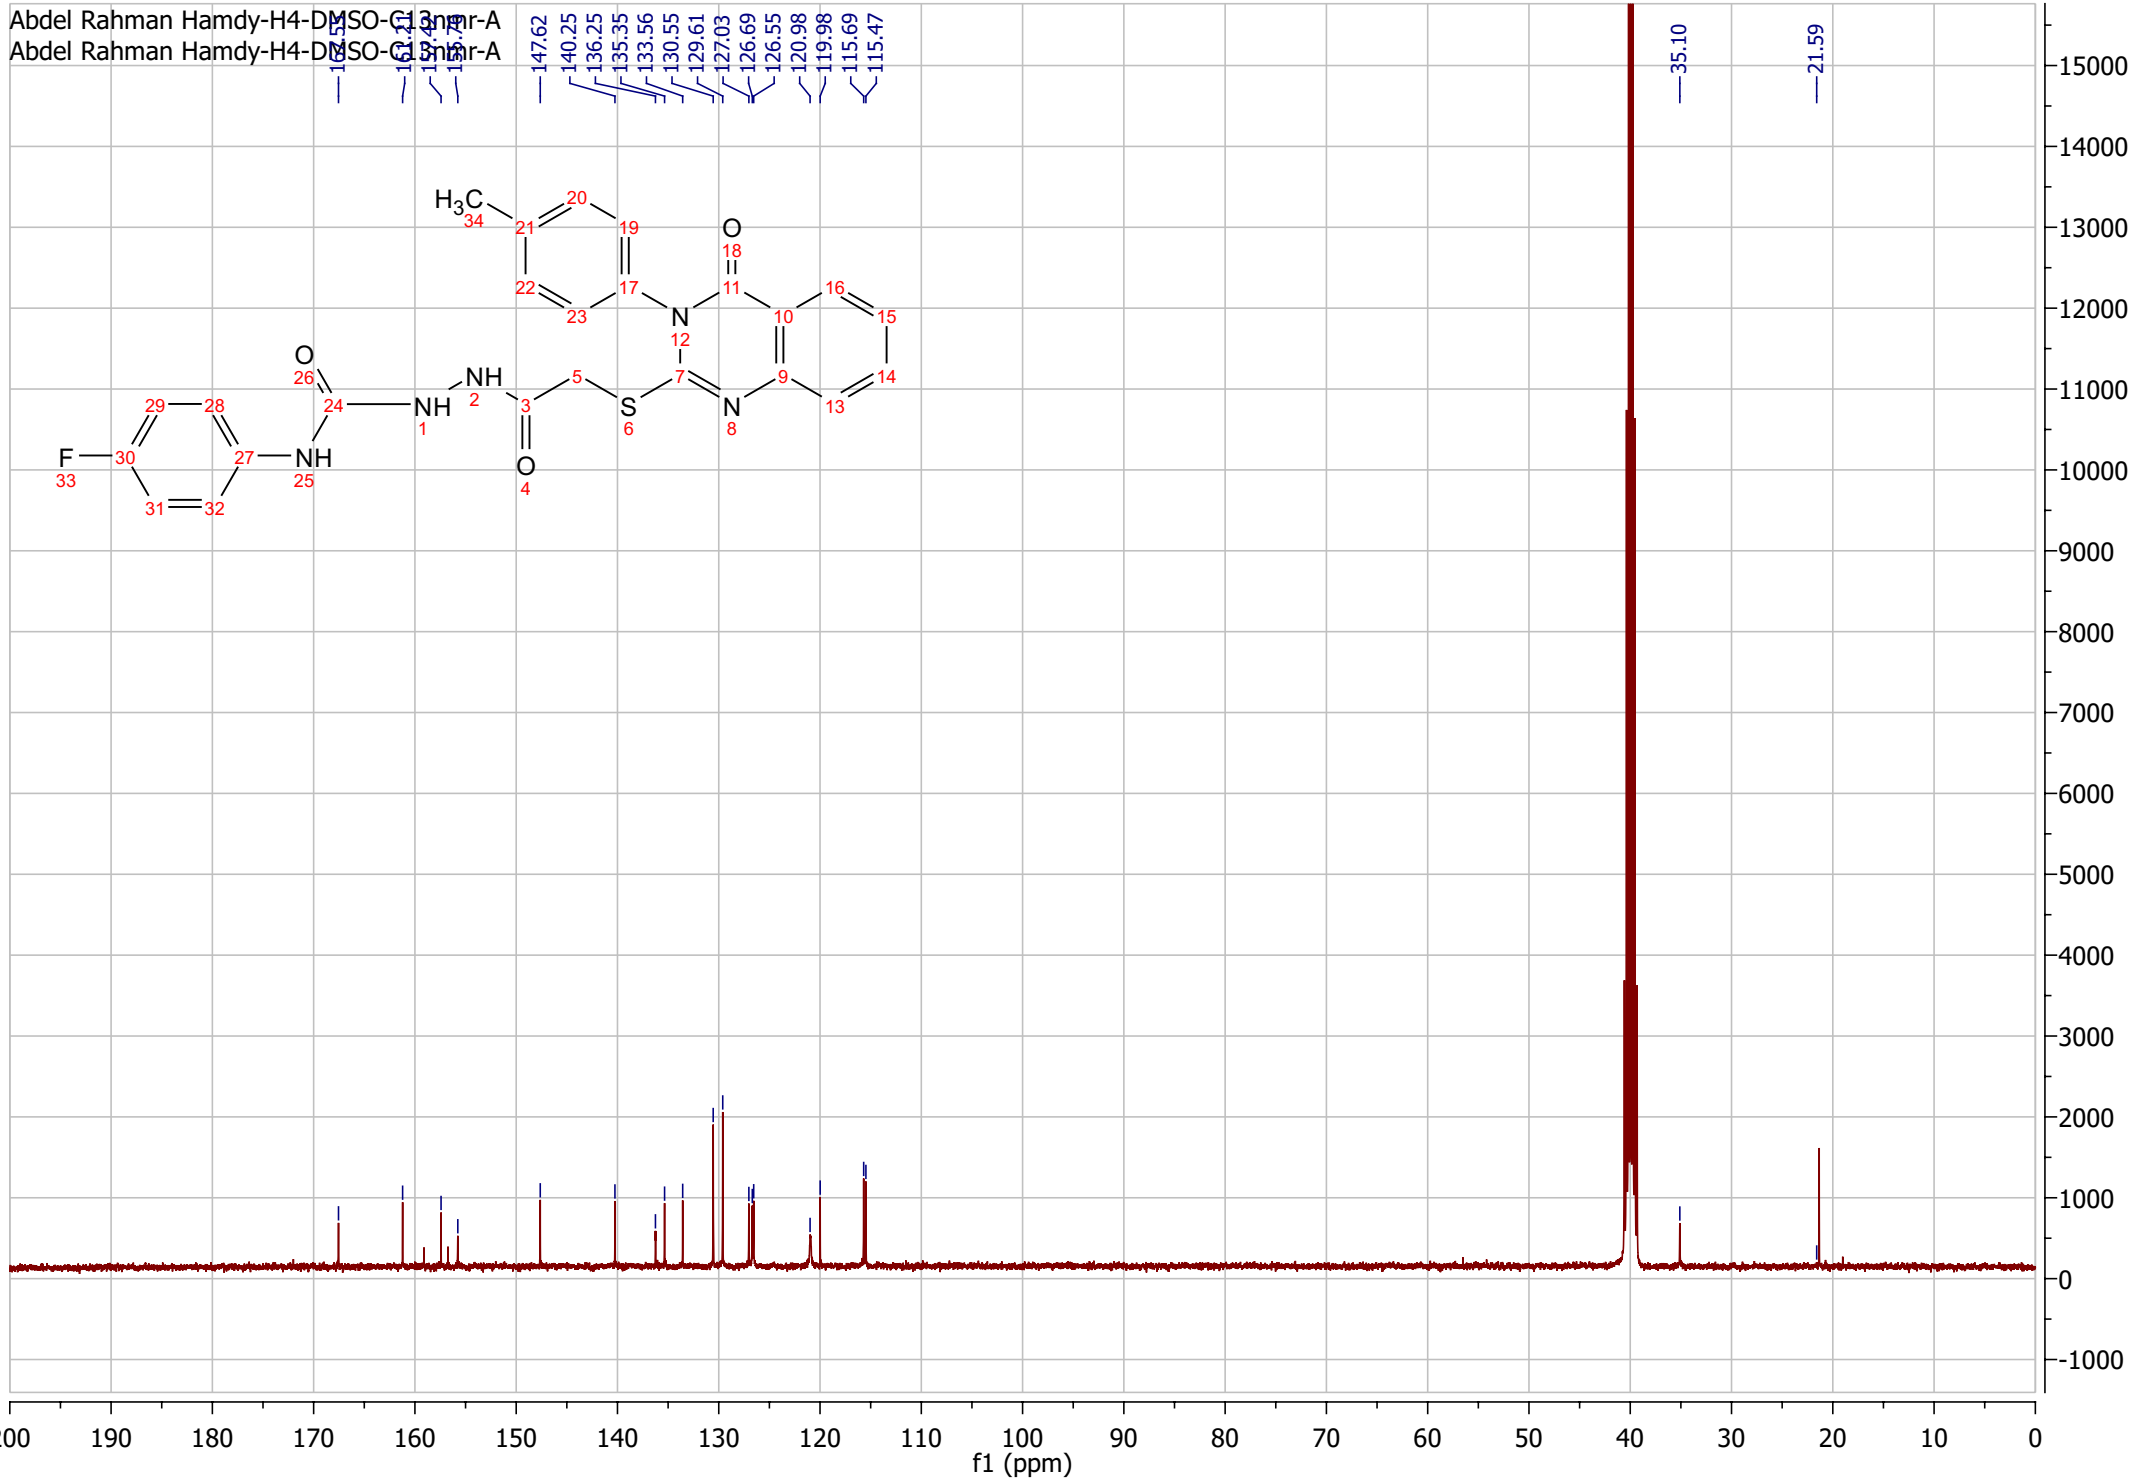

Abdel Rahman Hamdy-H5-DMSO-d<sub>6</sub>-13C Nmr-A  
Abdel Rahman Hamdy-H5-DMSO-d<sub>6</sub>-13C Nmr-A

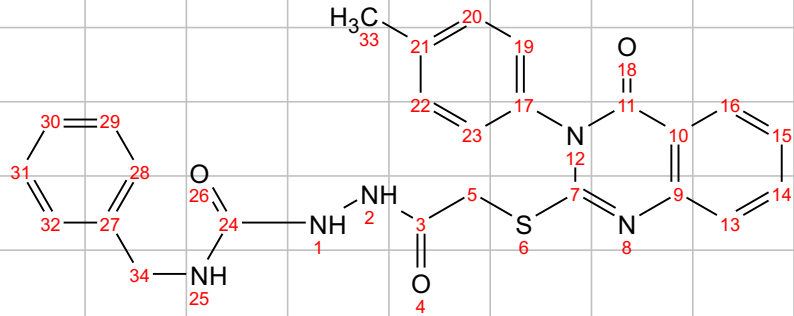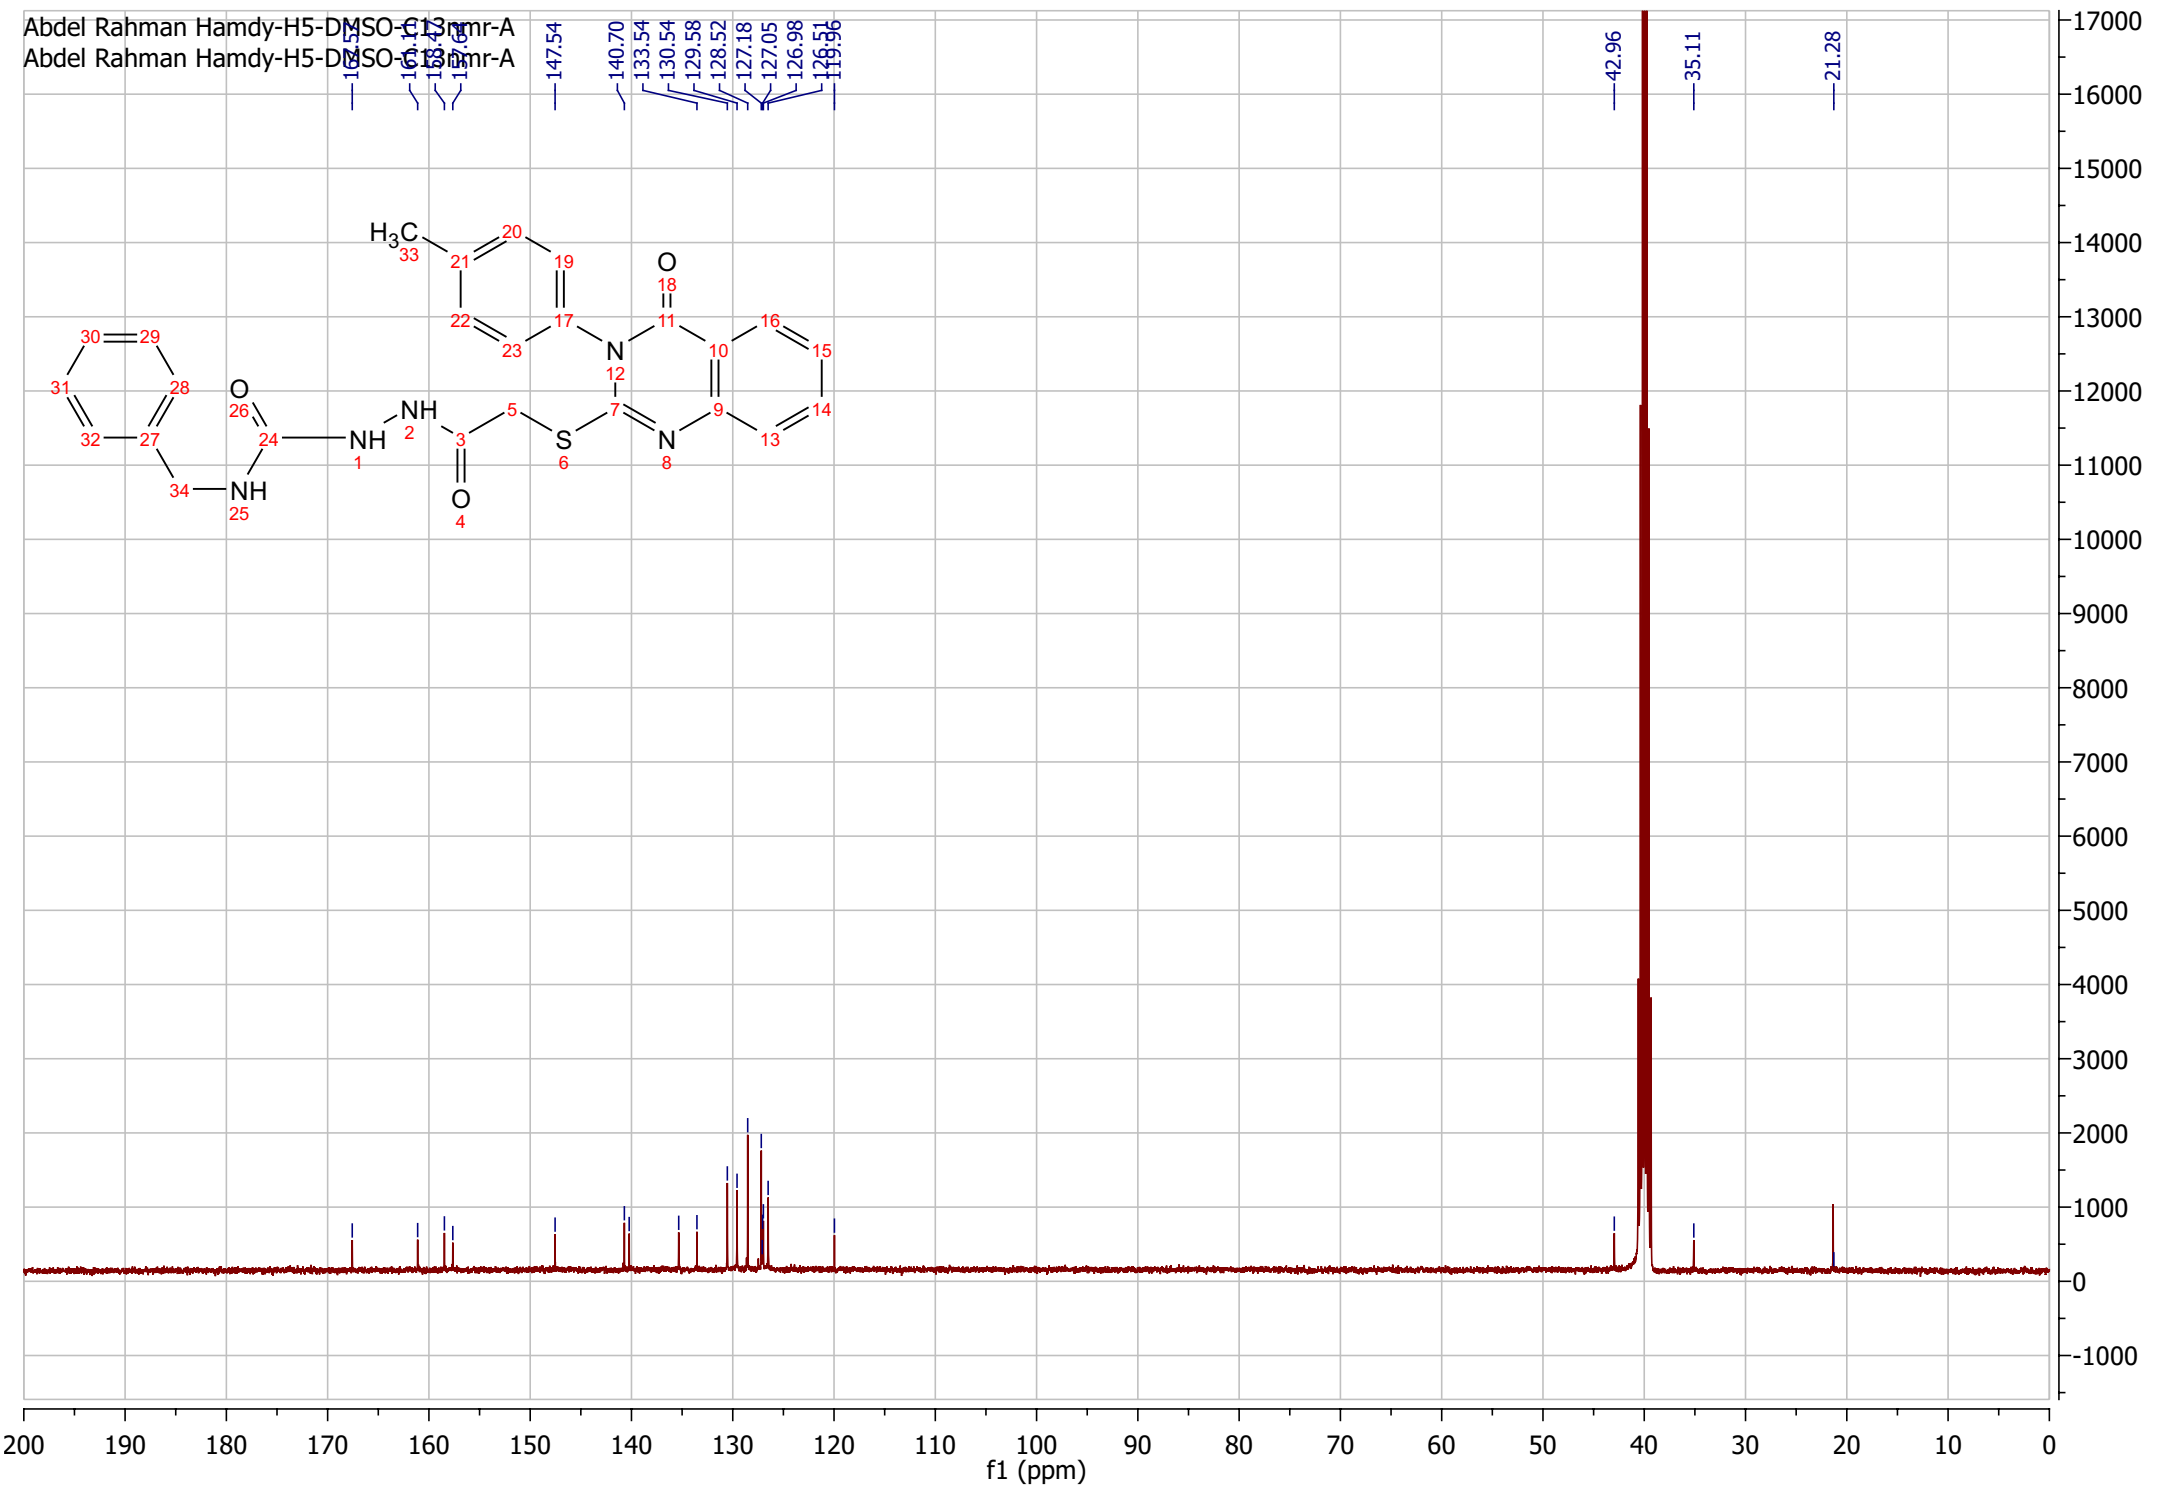



Abealrahman hamdi-H6-carbon-ES  
Abealrahman hamdi-H6-carbon-ES

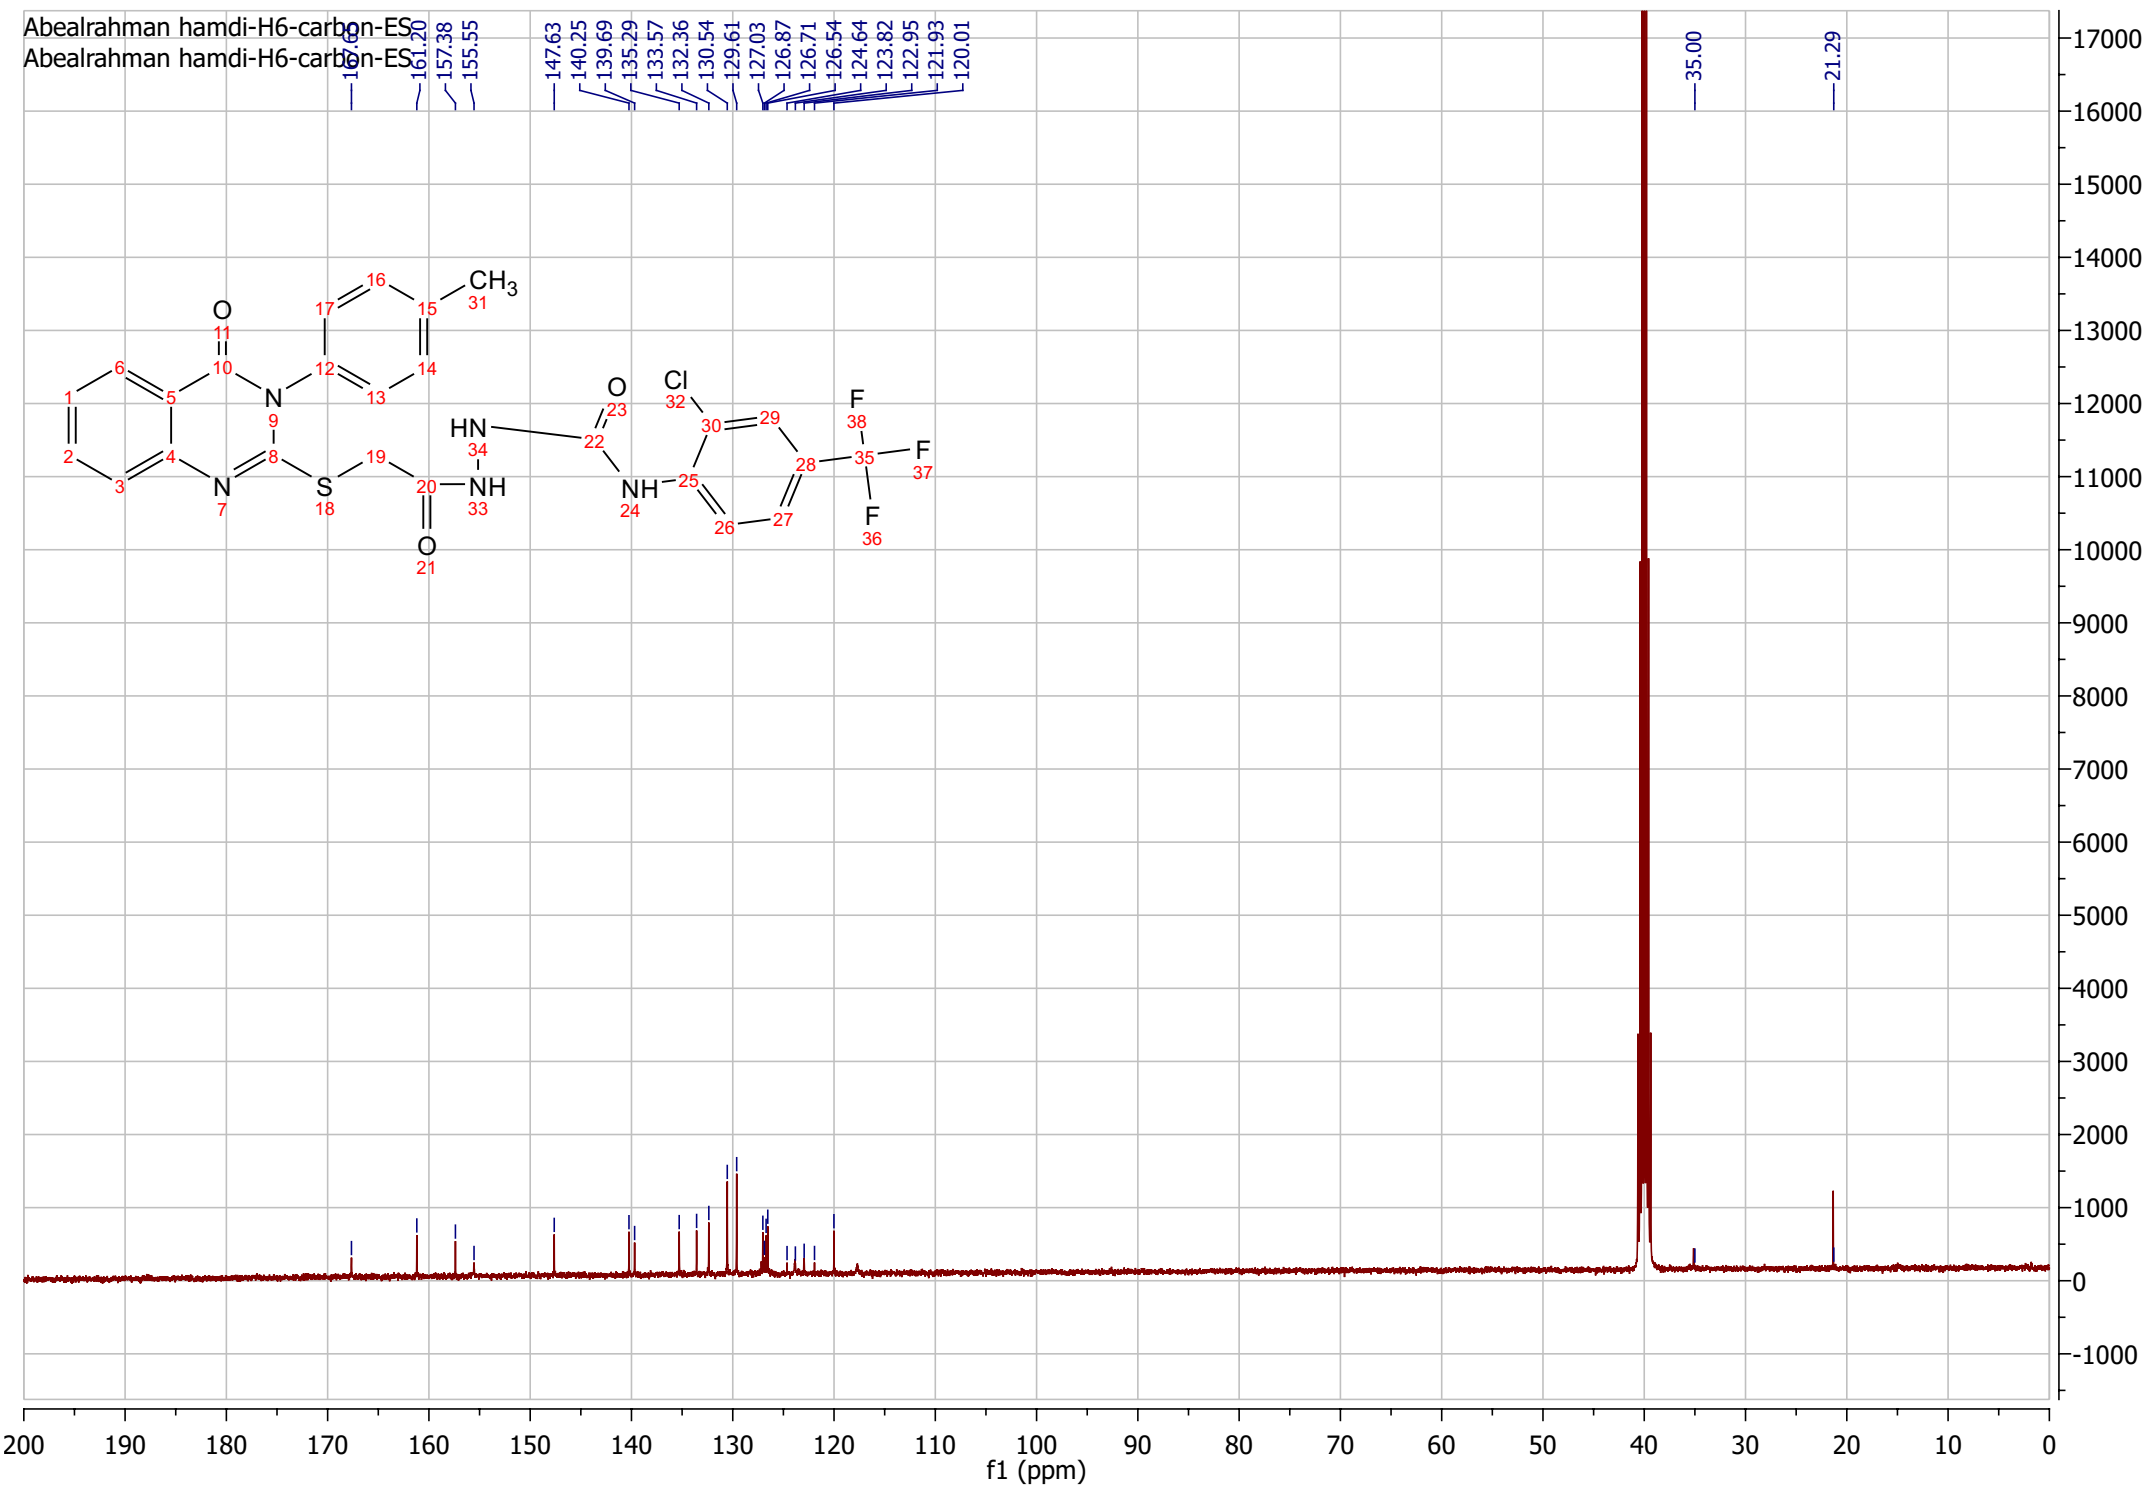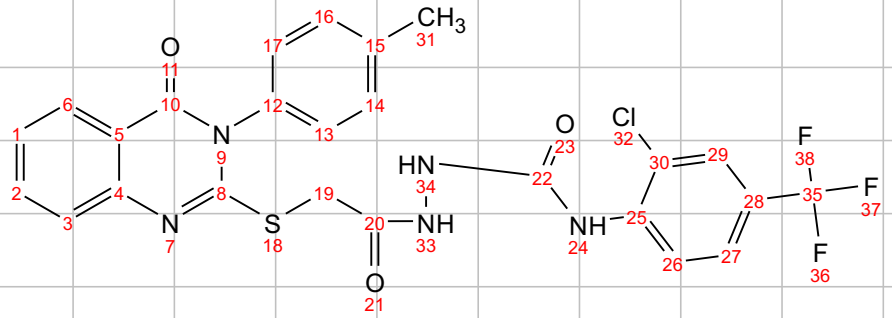

Abdelrahman Hamdy-H11-C13-RR  
Abdelrahman Hamdy-H11-C13-RR

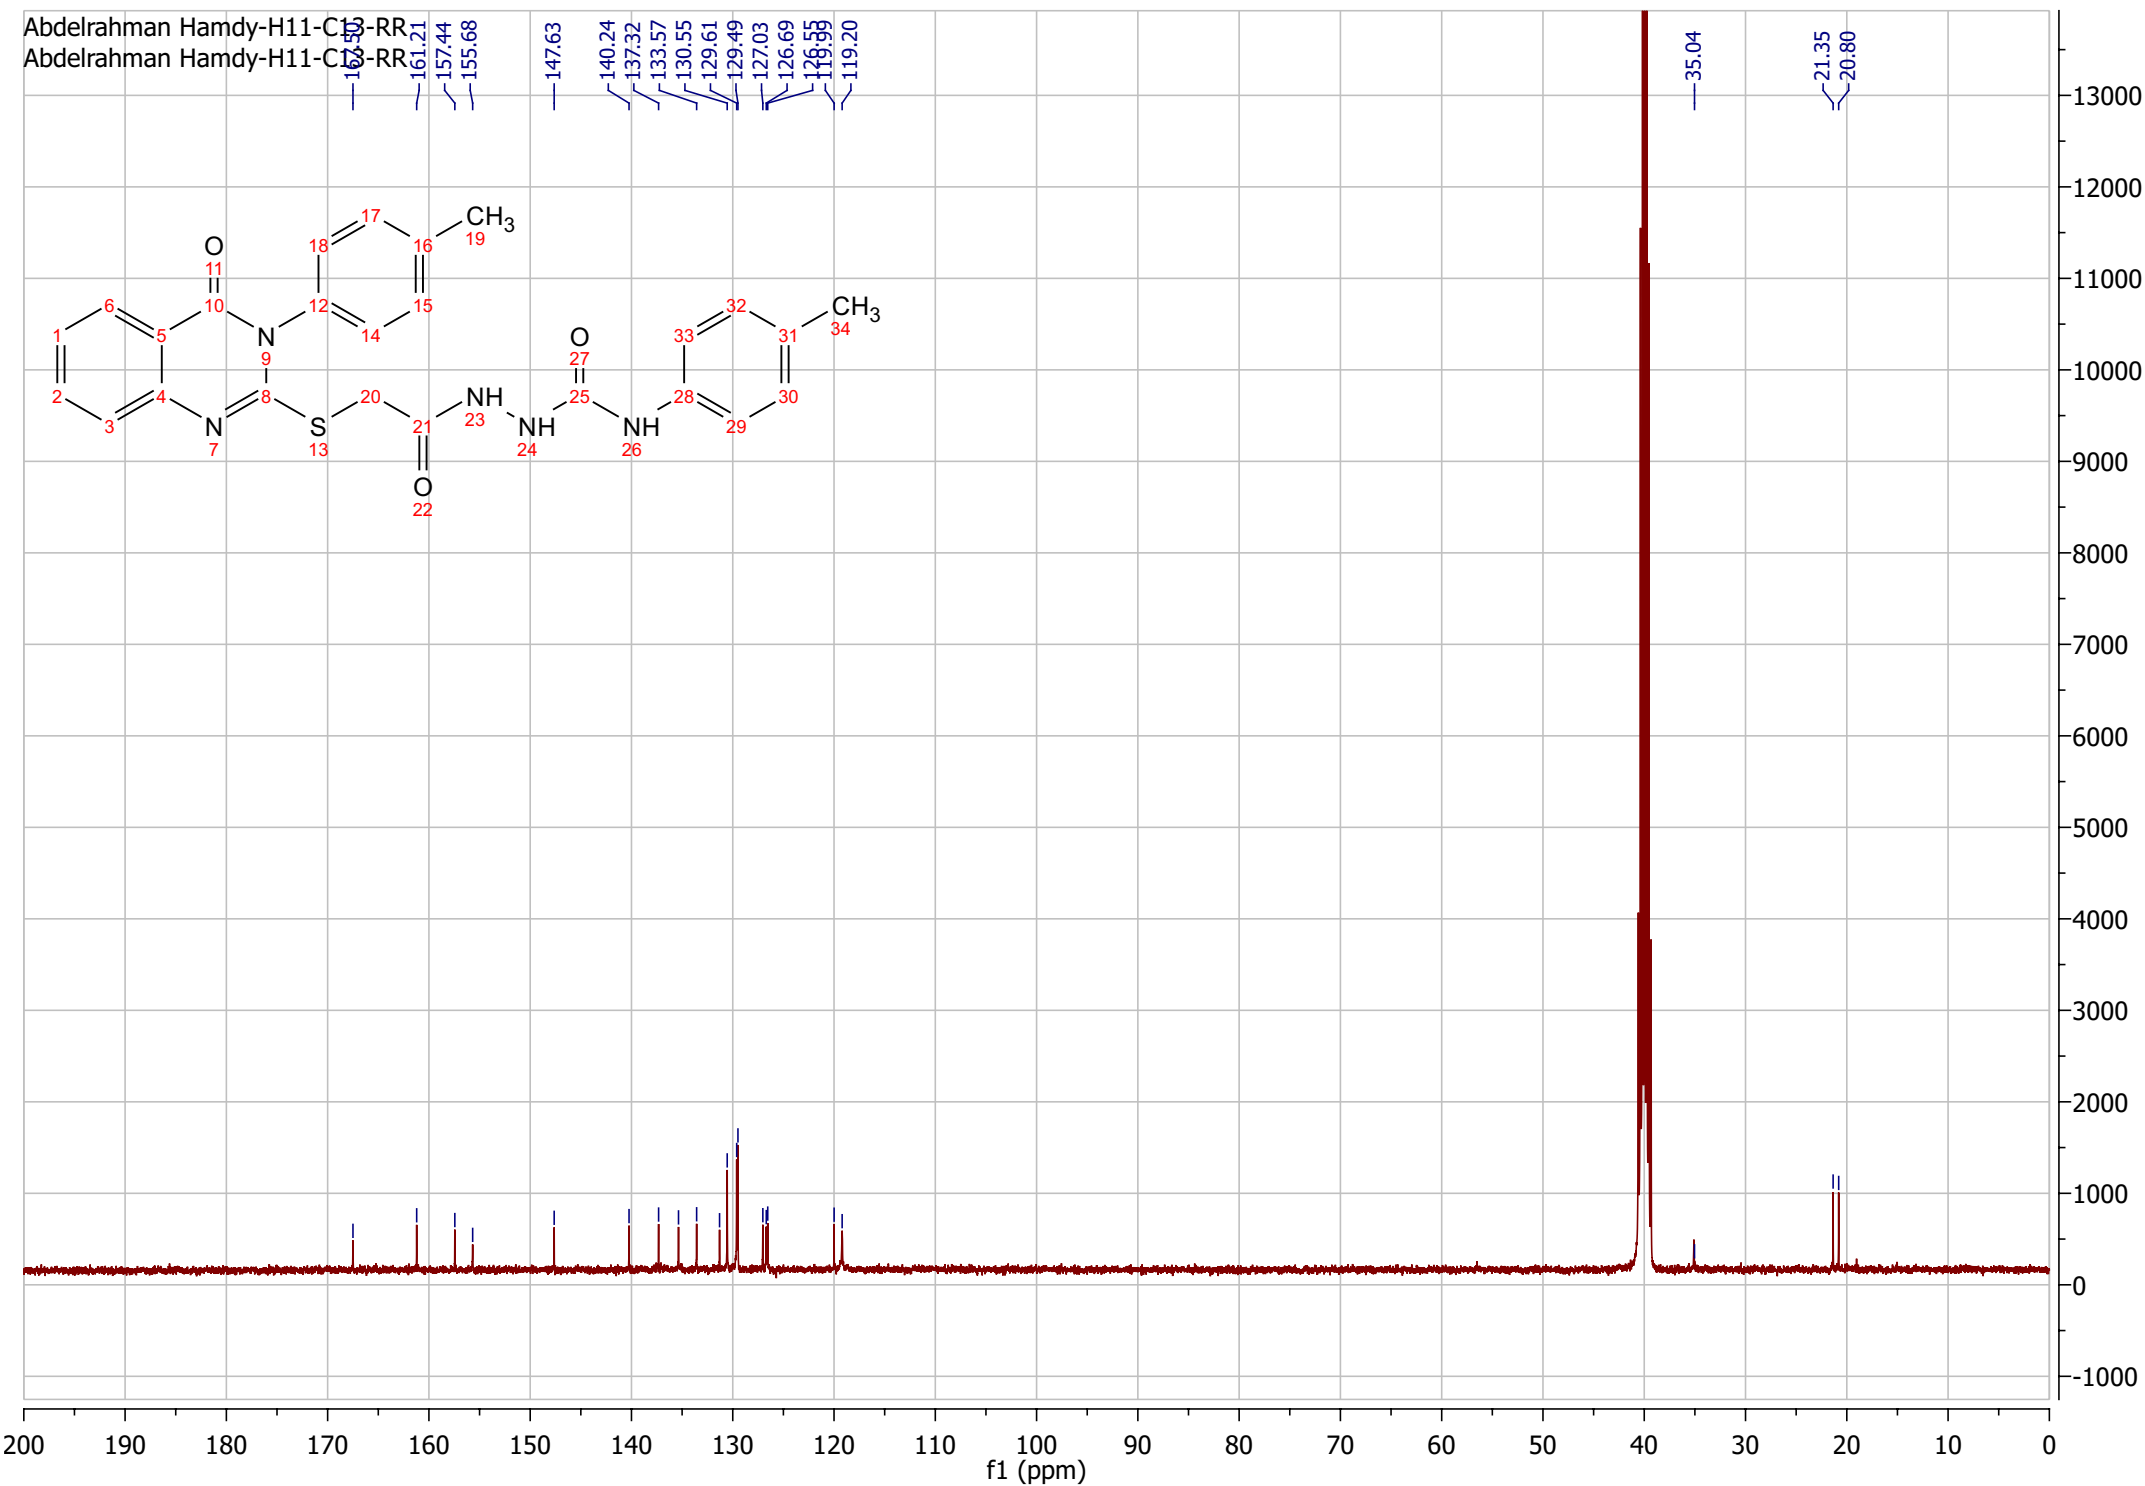

Abealrahman hamdi-H12-carbon-13  
Abealrahman hamdi-H12-carbon-13

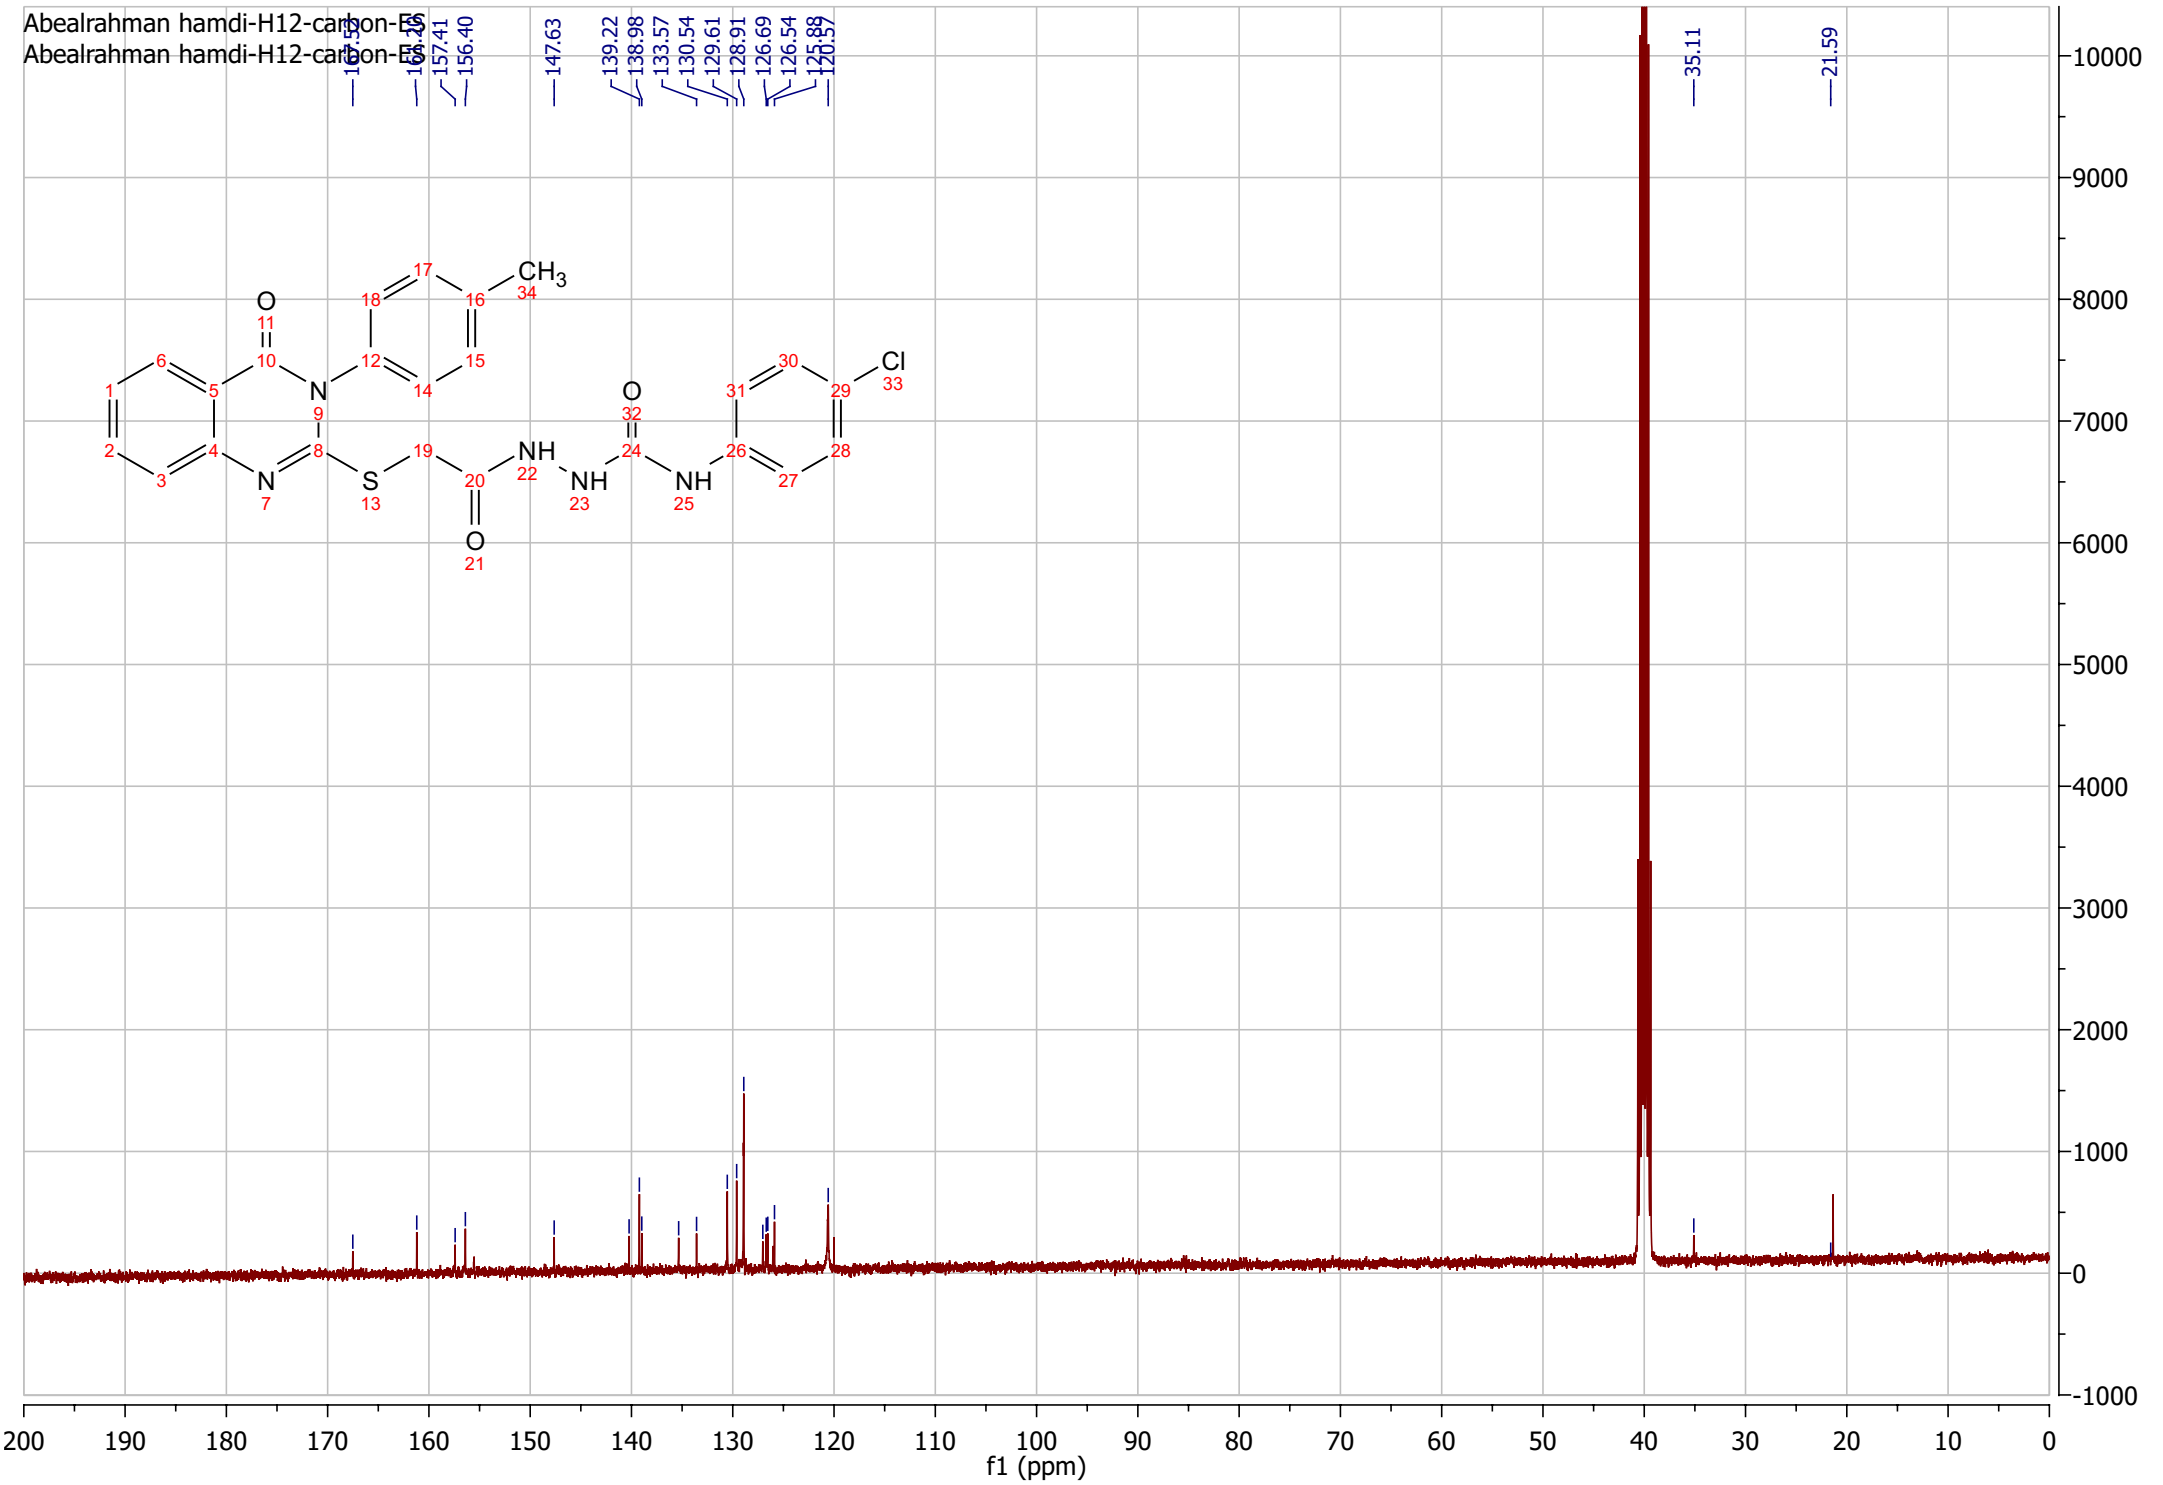

Abdel Rahman Hamdy-T41-DMSO-d<sub>6</sub>-Cl<sub>3</sub>mr-A  
Abdel Rahman Hamdy-T41-DMSO-d<sub>6</sub>-Cl<sub>3</sub>mr-A

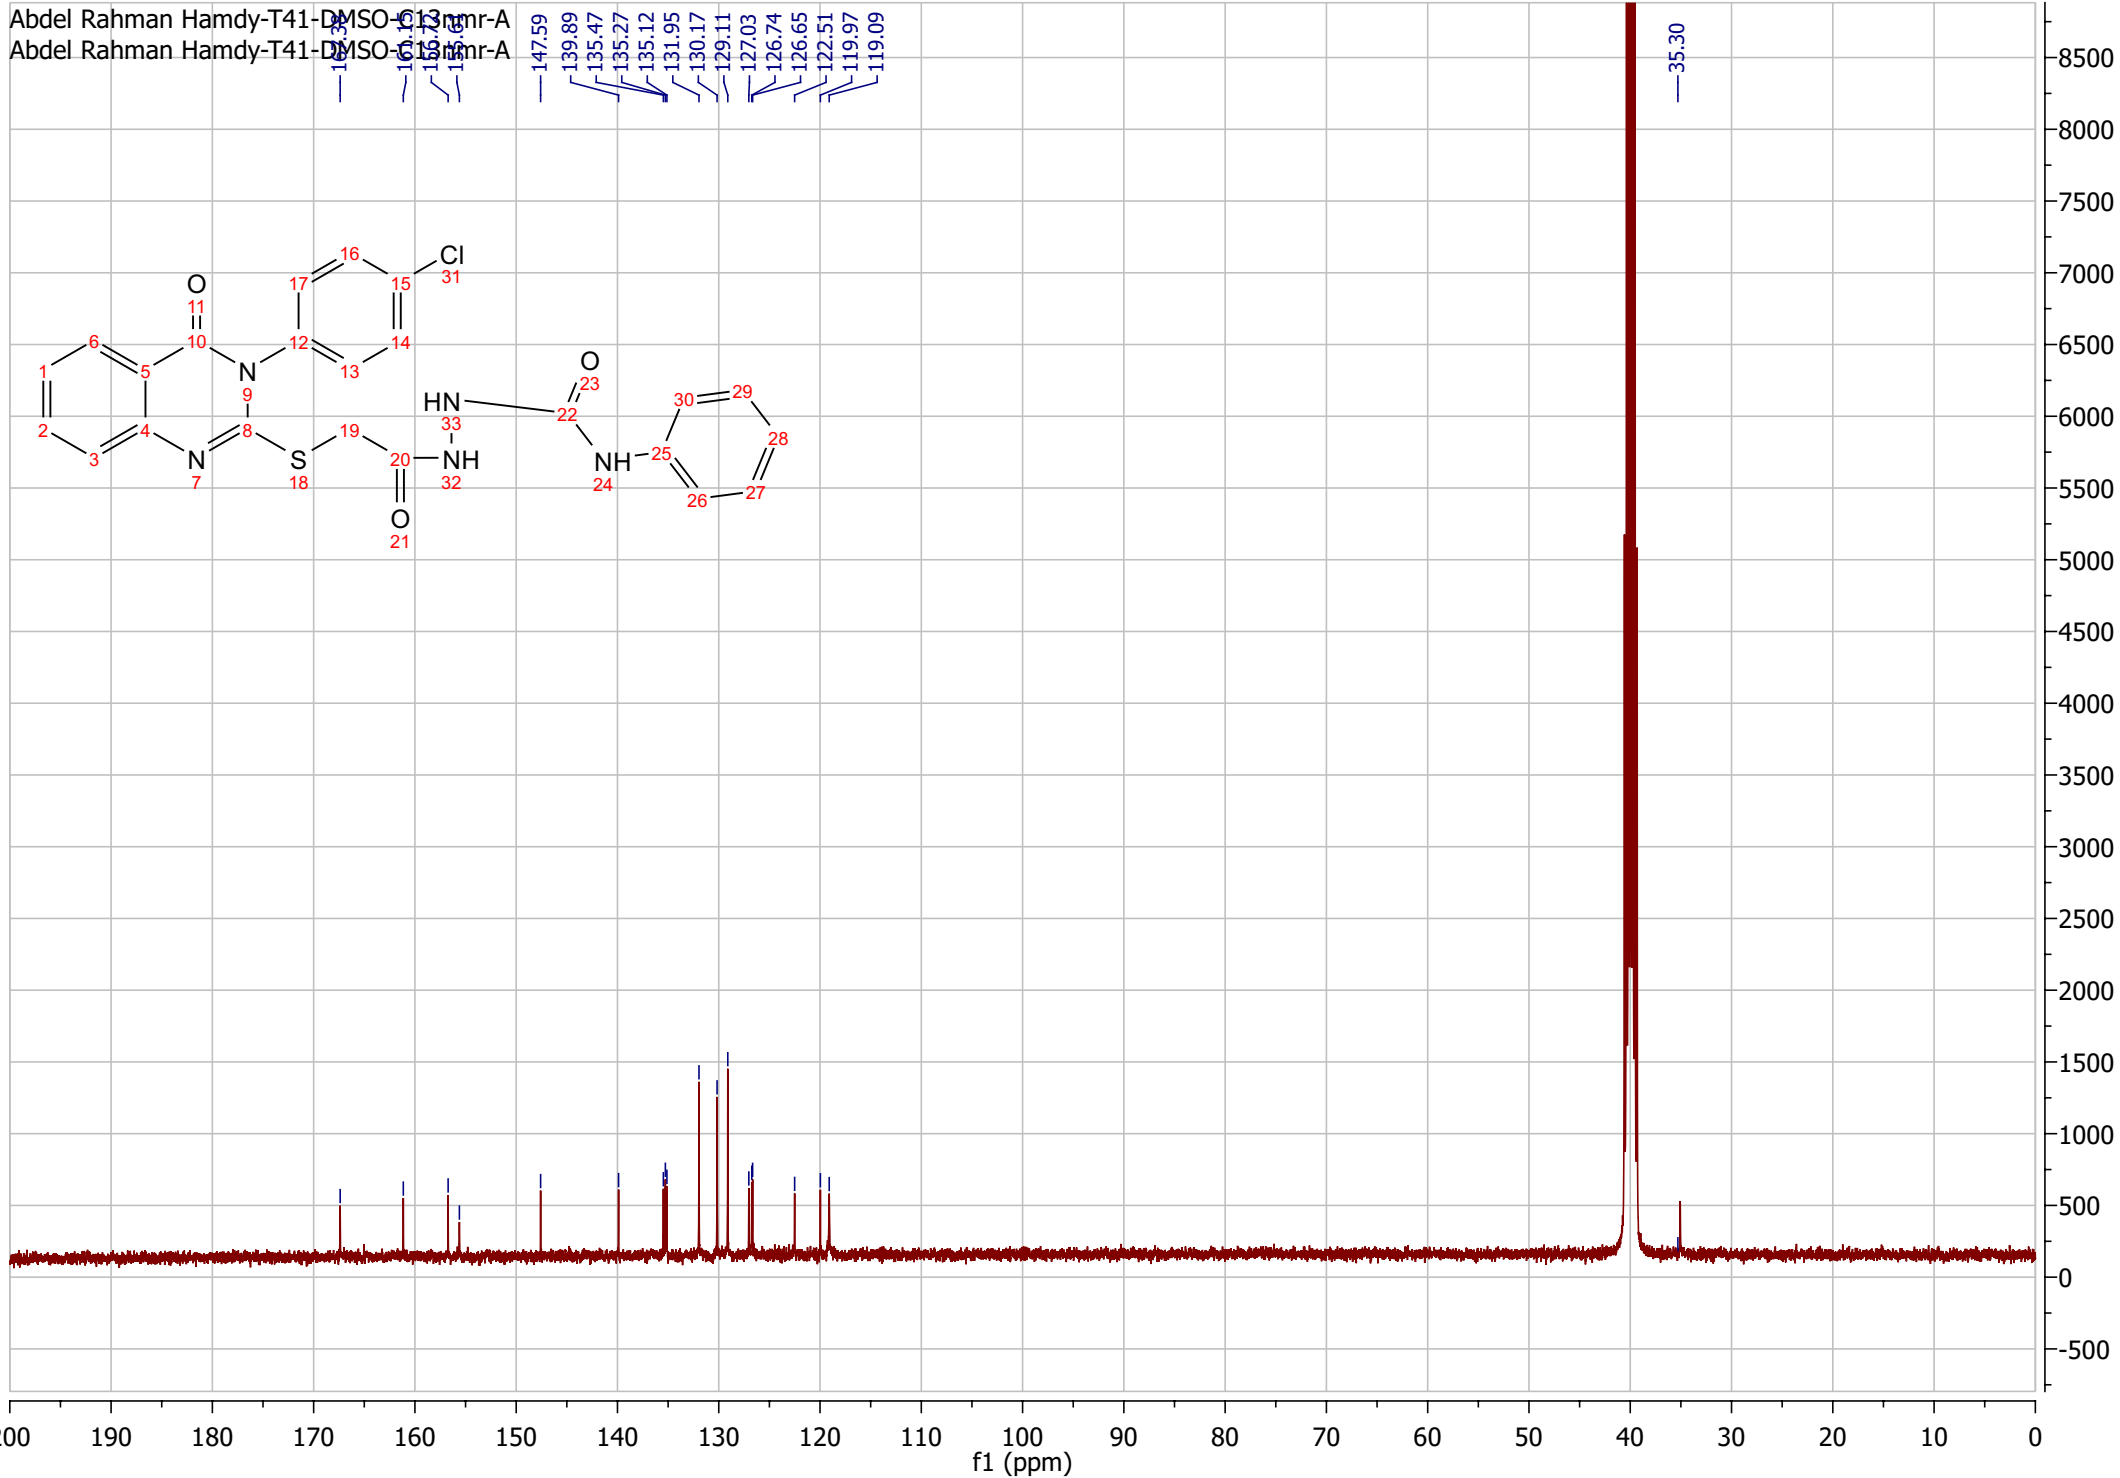

Abdel Rahman Hamdy-T42-DMSO-d<sub>6</sub>-C13-arr-A  
Abdel Rahman Hamdy-T42-DMSO-d<sub>6</sub>-C13-arr-A

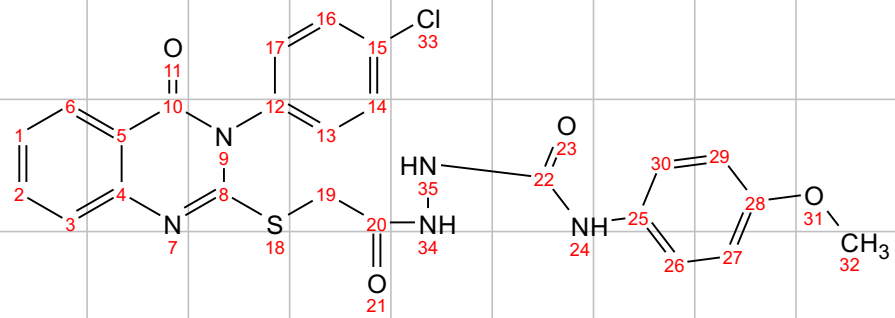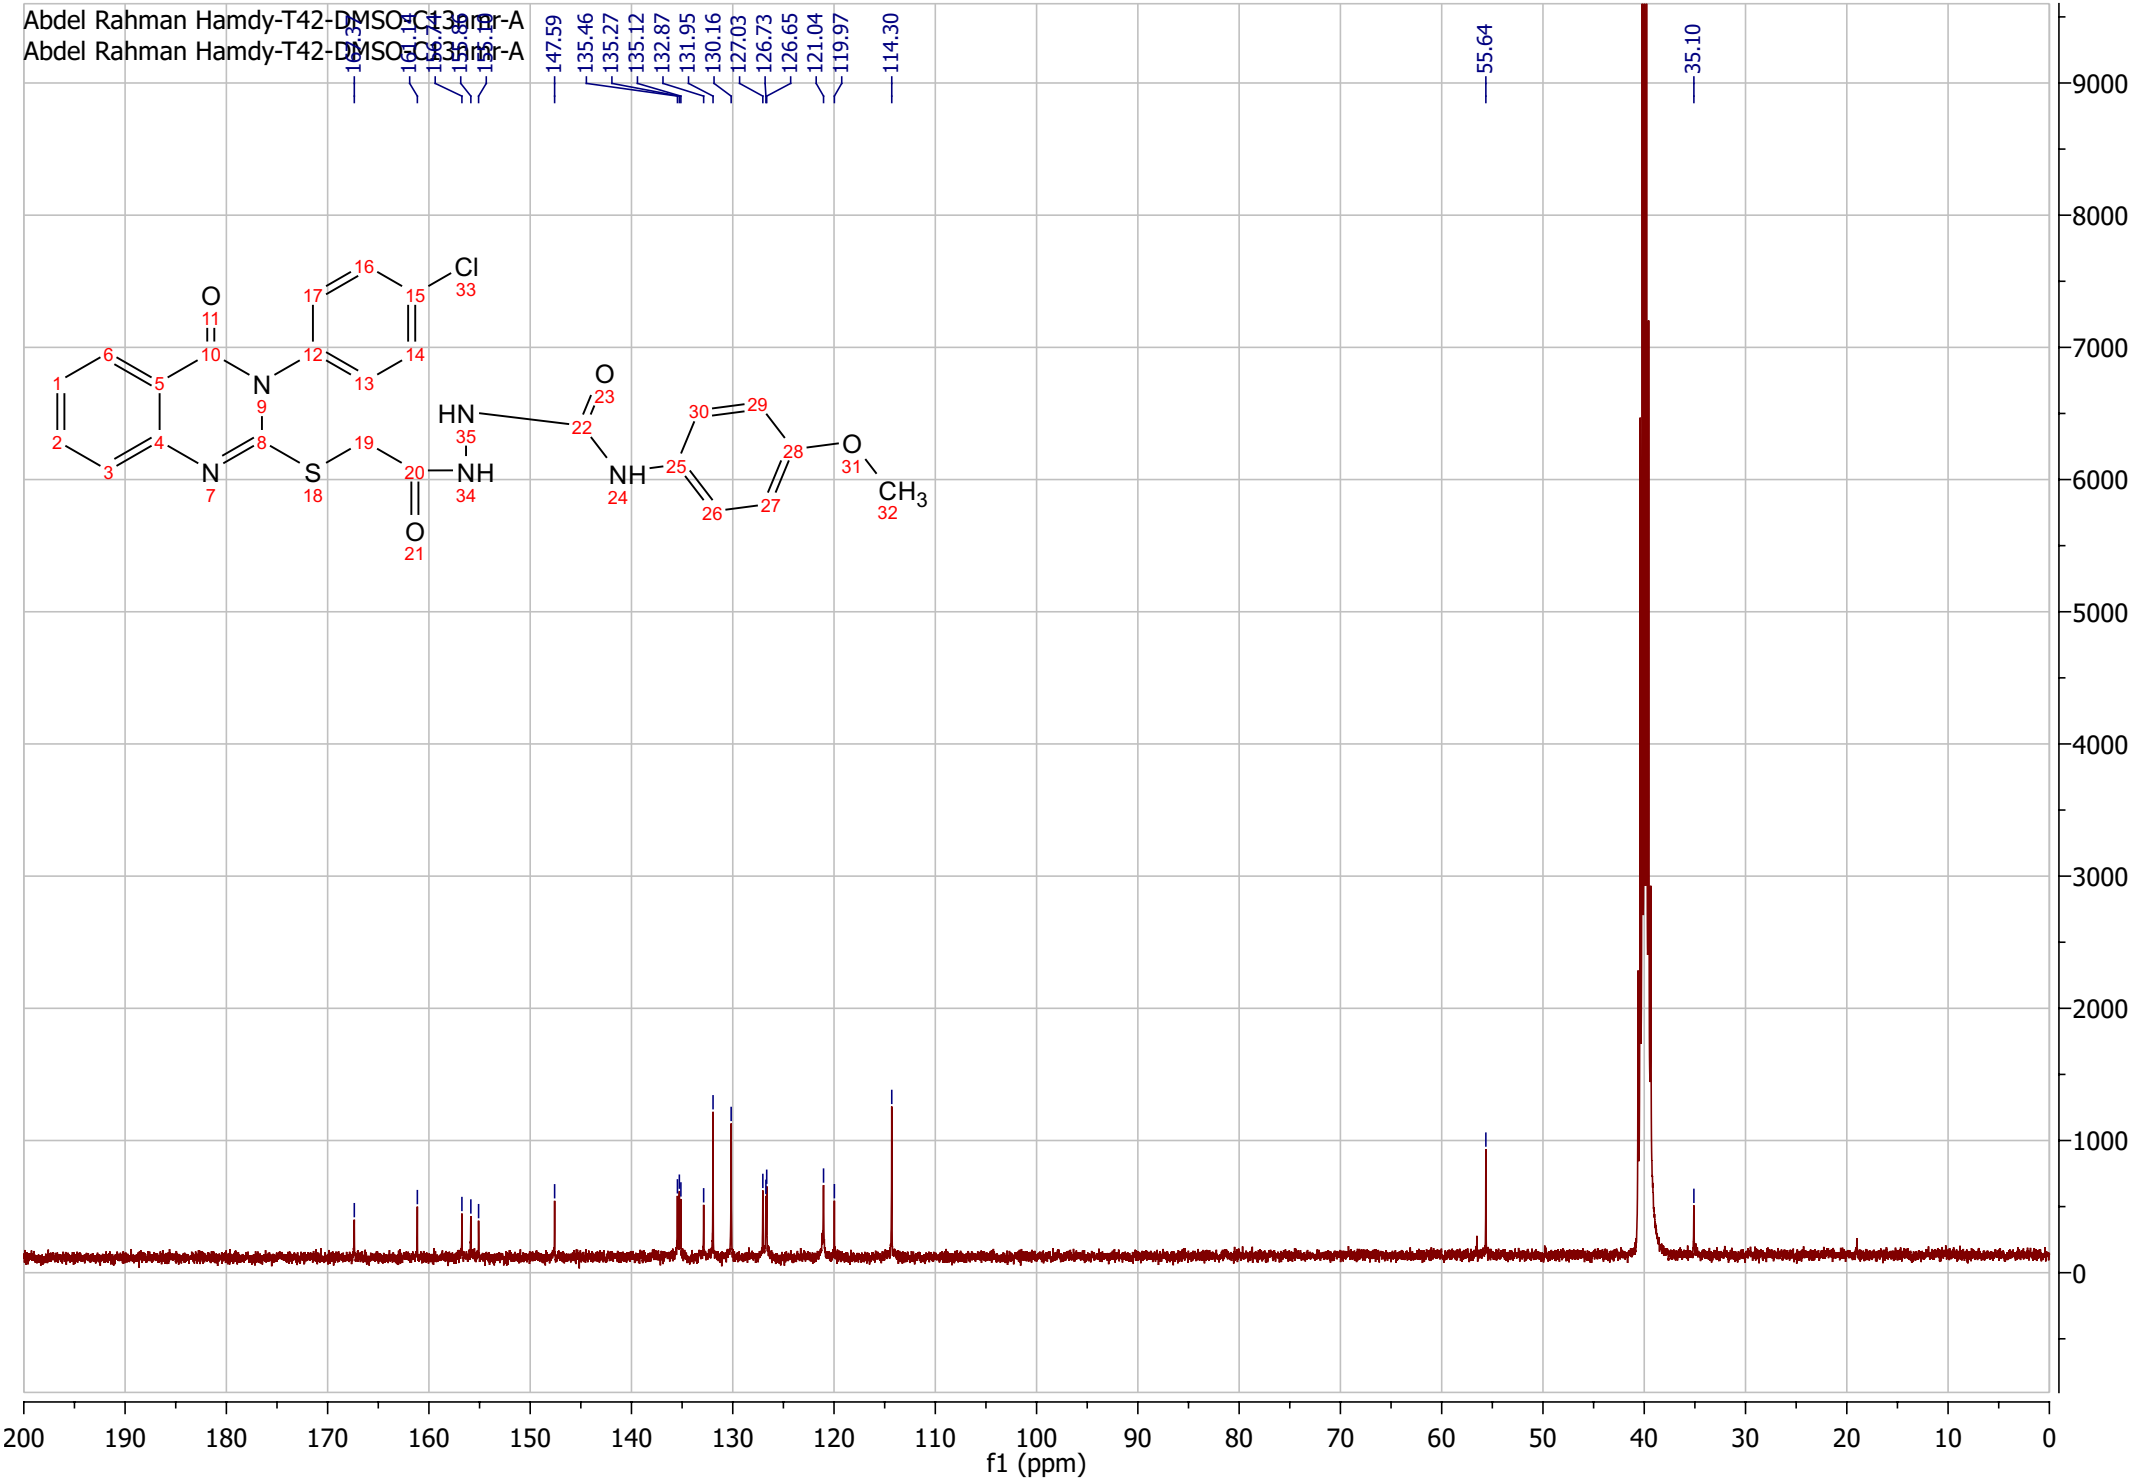

Abdel Rahman Hamdy-T43-DMSO-d<sub>6</sub>-13mr-A  
Abdel Rahman Hamdy-T43-DMSO-d<sub>6</sub>-13mr-A

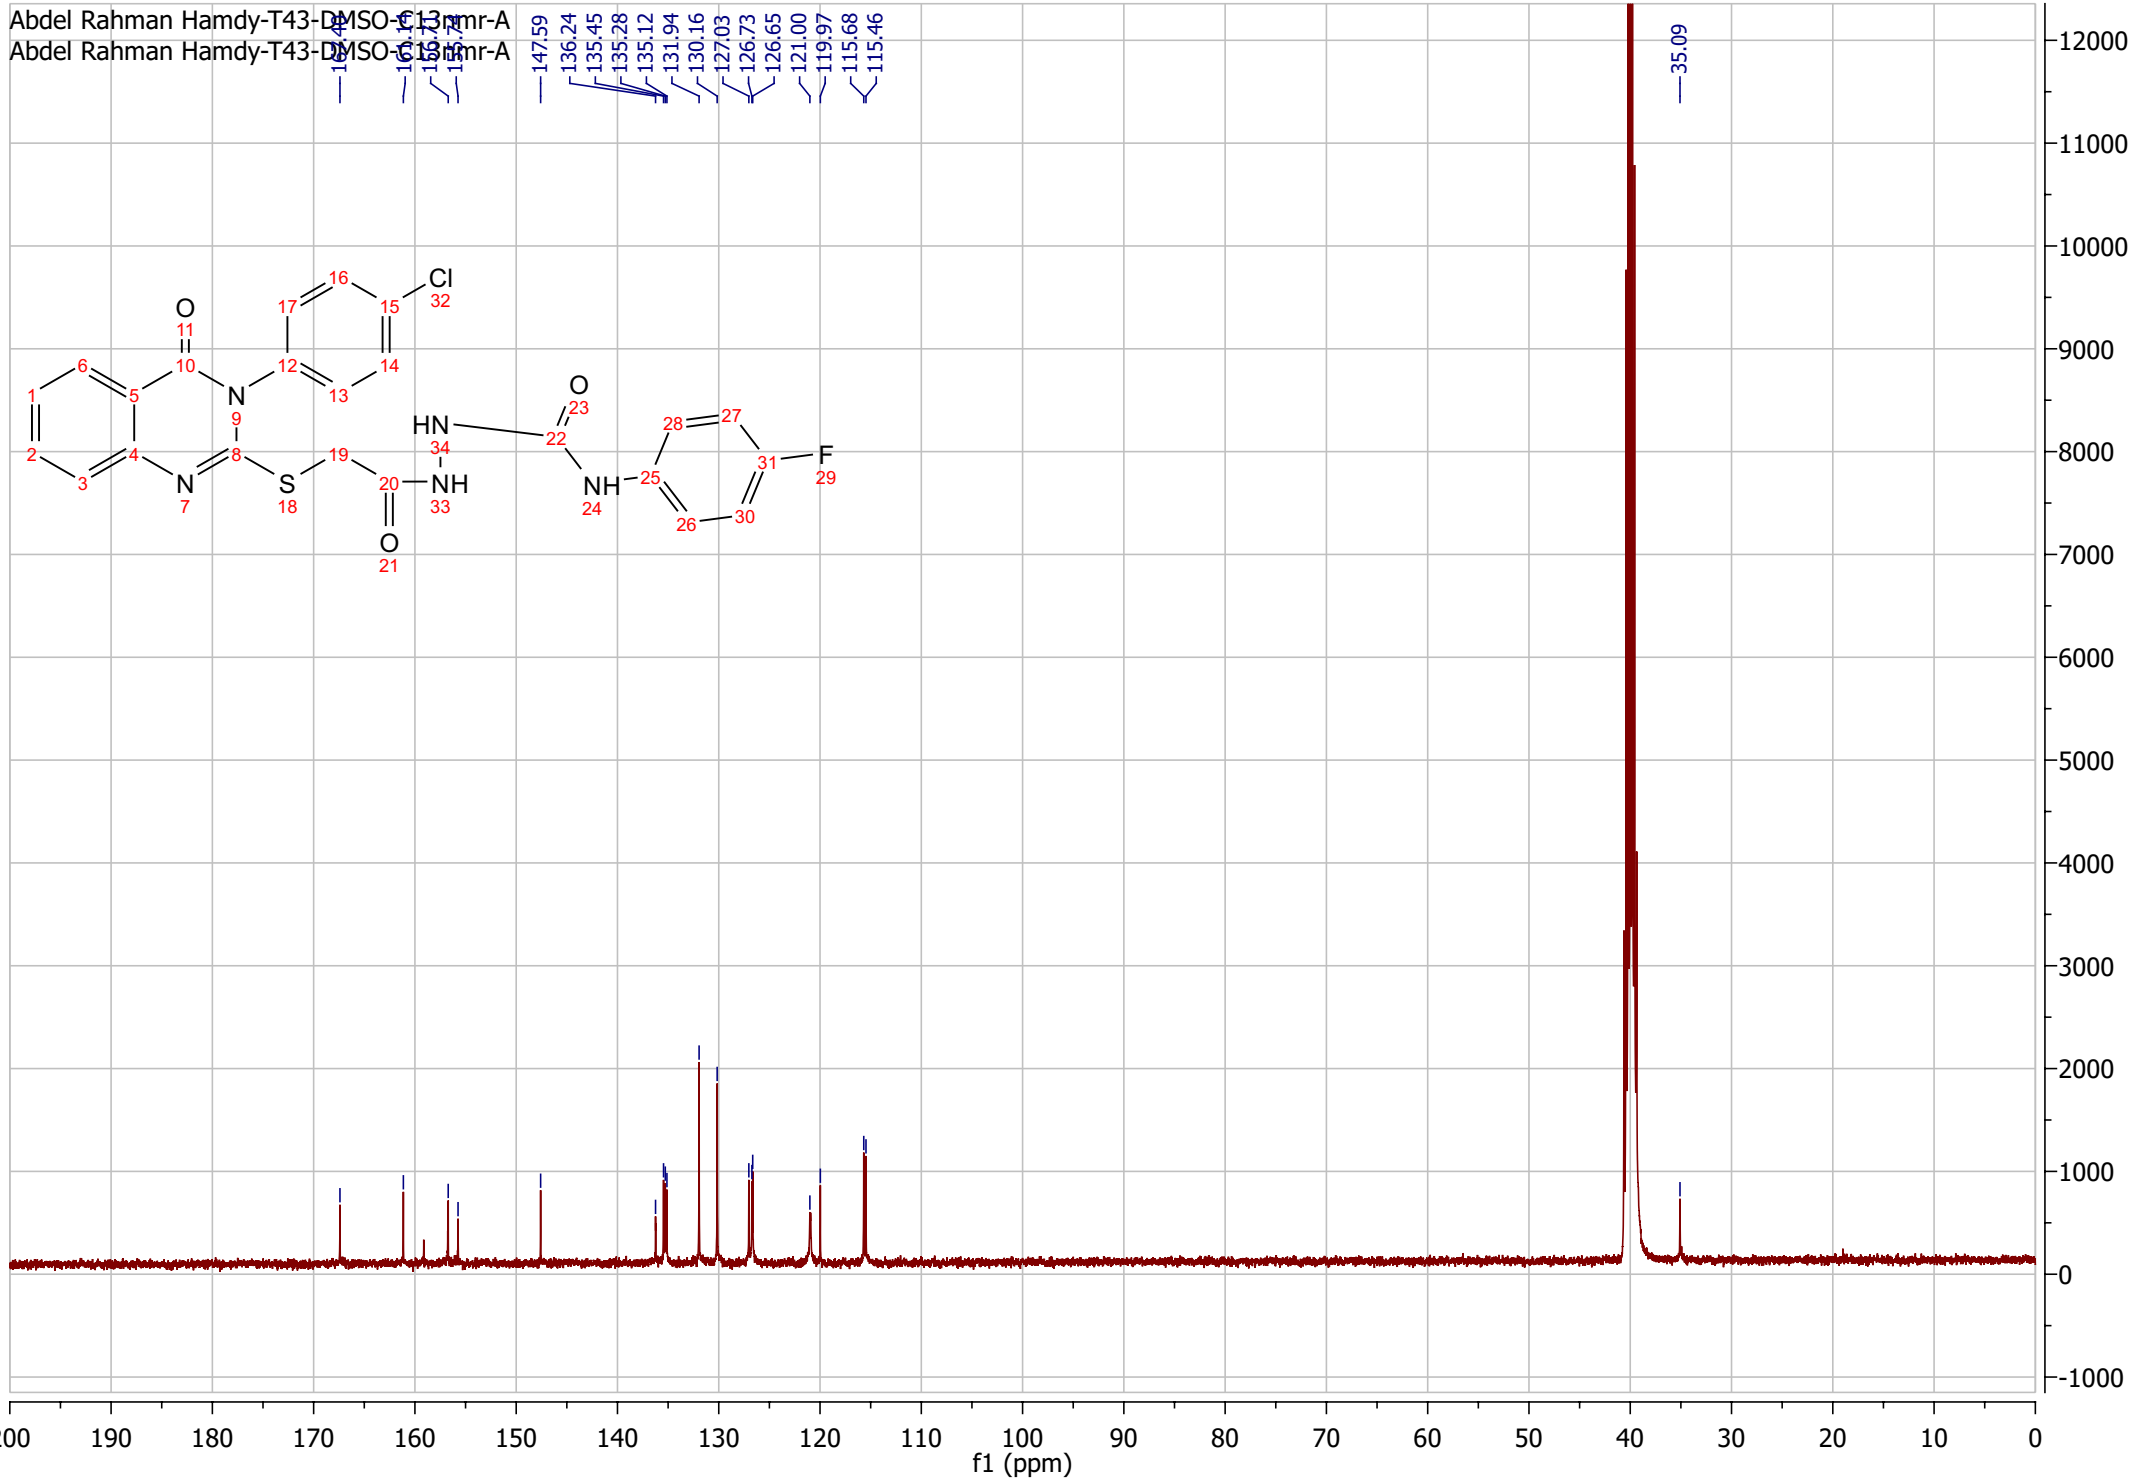

Abdel Rahman Hamdy-T44-DMSO-d<sub>6</sub>-130mr-A  
Abdel Rahman Hamdy-T44-DMSO-d<sub>6</sub>-130mr-A

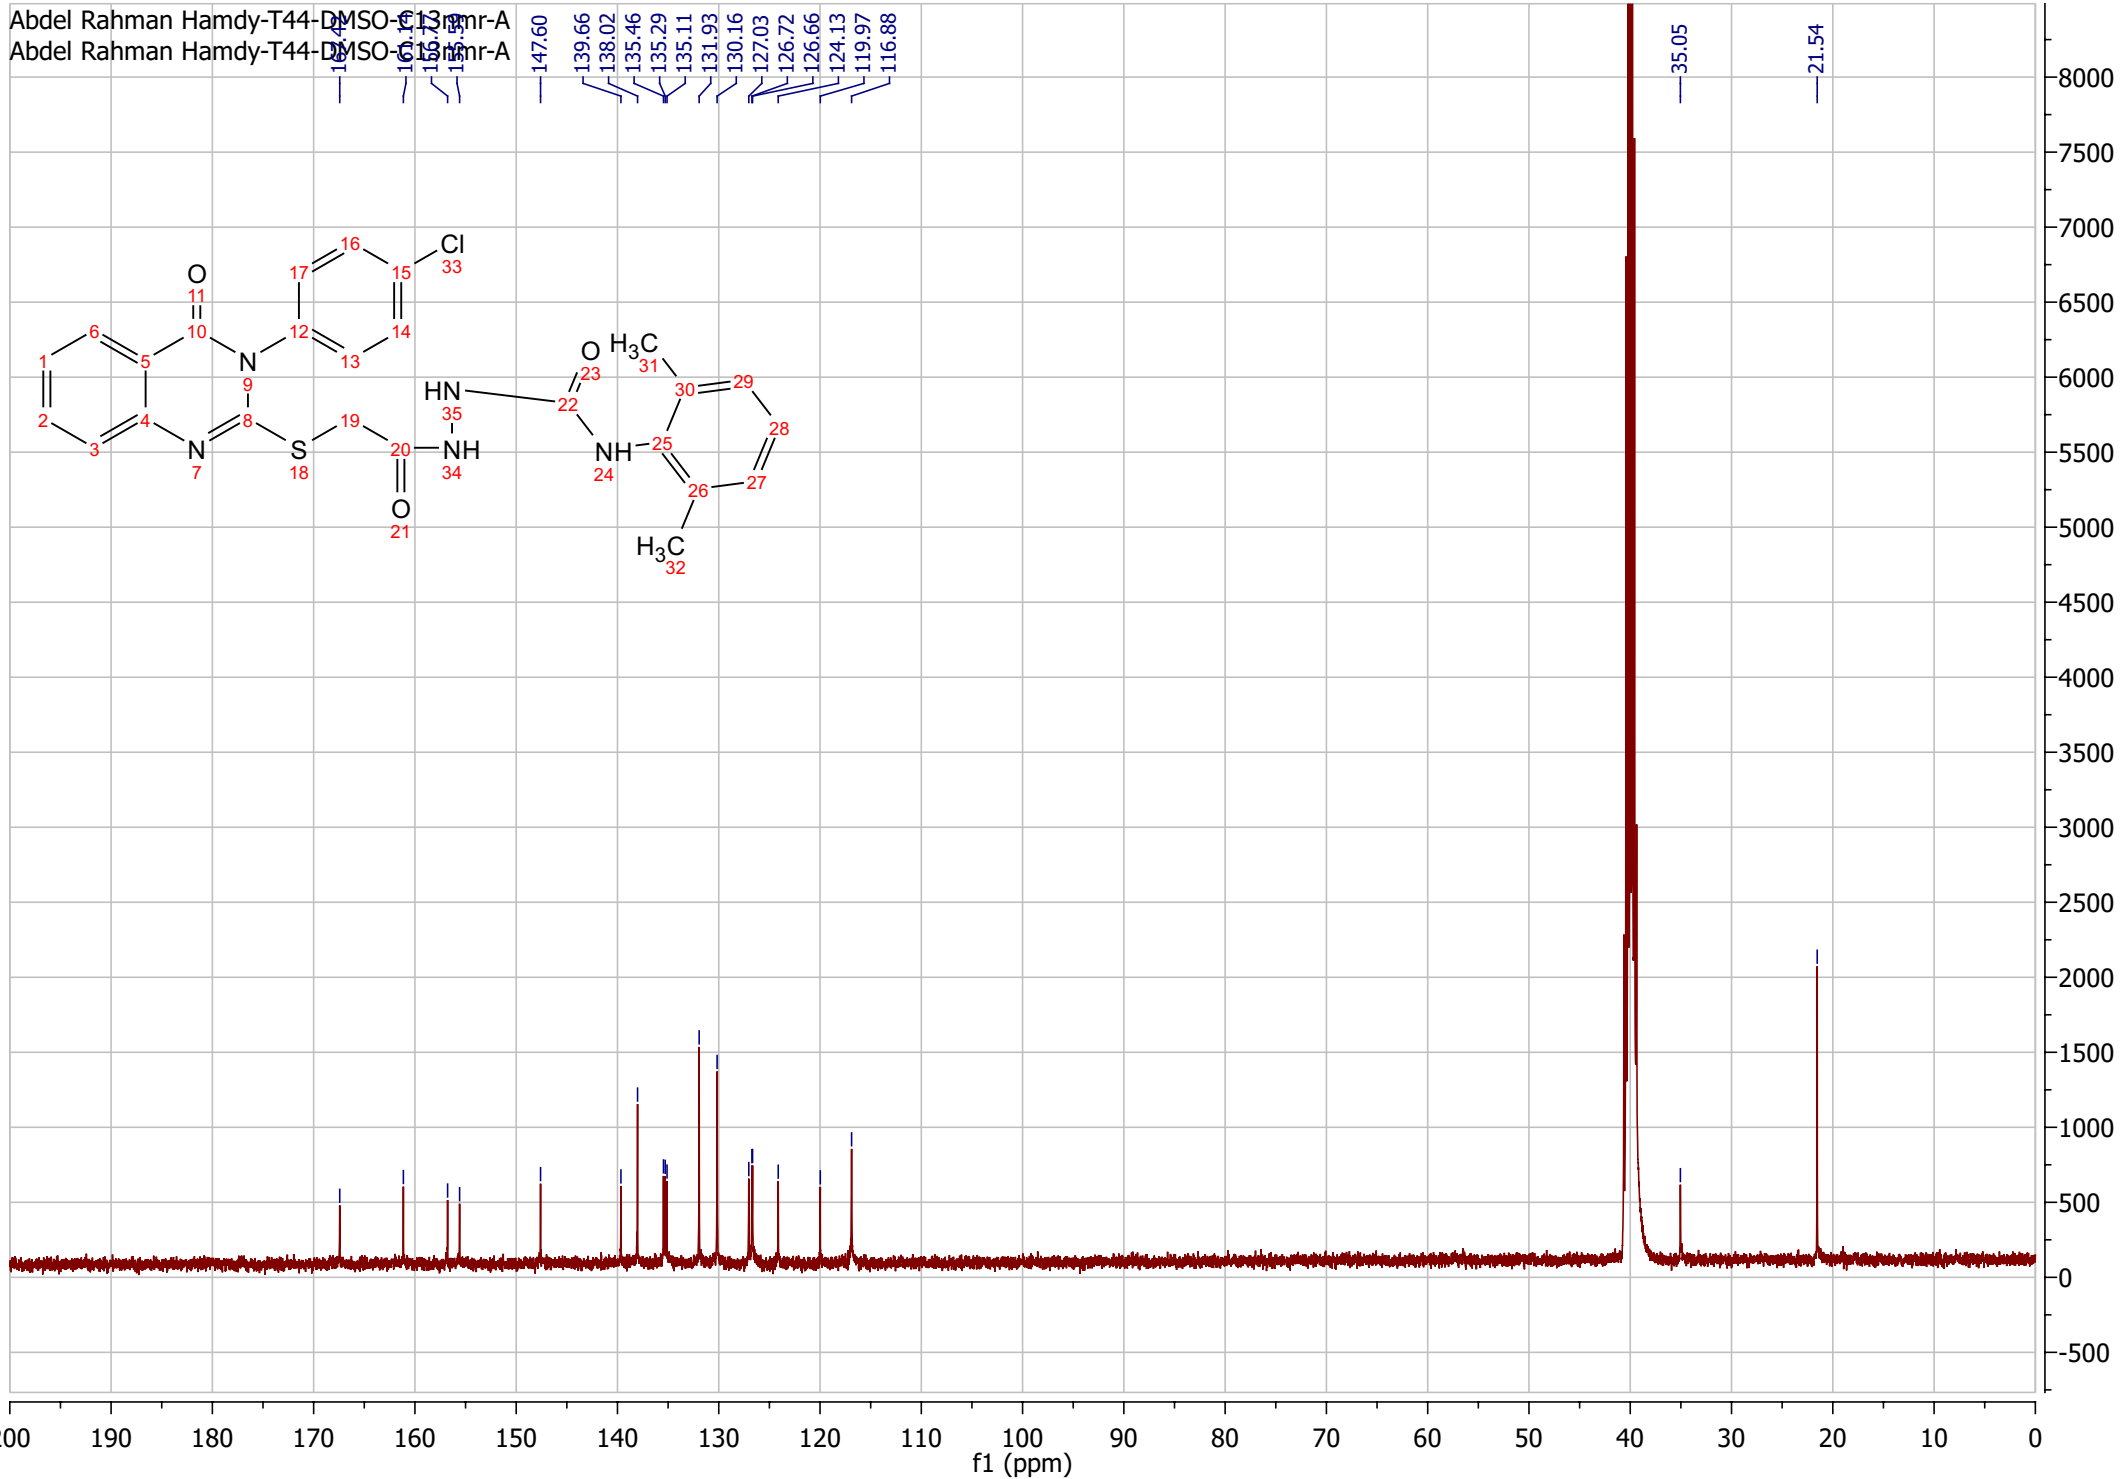

Abdel Rahman Hamdy-T45-DMSO-d<sub>6</sub>-130mr-A  
Abdel Rahman Hamdy-T45-DMSO-d<sub>6</sub>-130mr-A

147.50  
140.69  
131.91  
130.16  
128.53  
127.19  
127.05  
126.99  
126.83  
126.83

42.97  
35.09

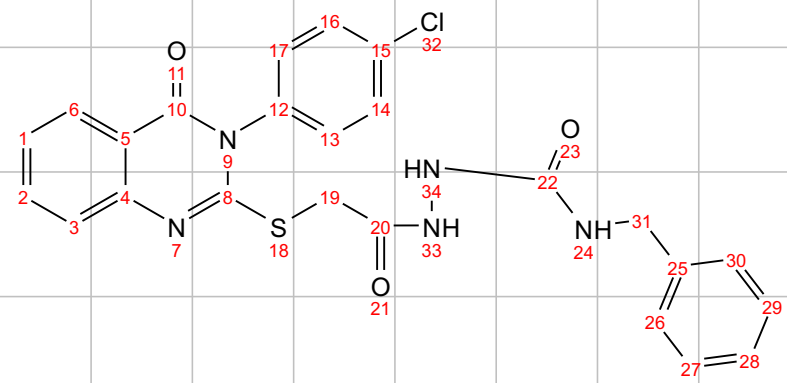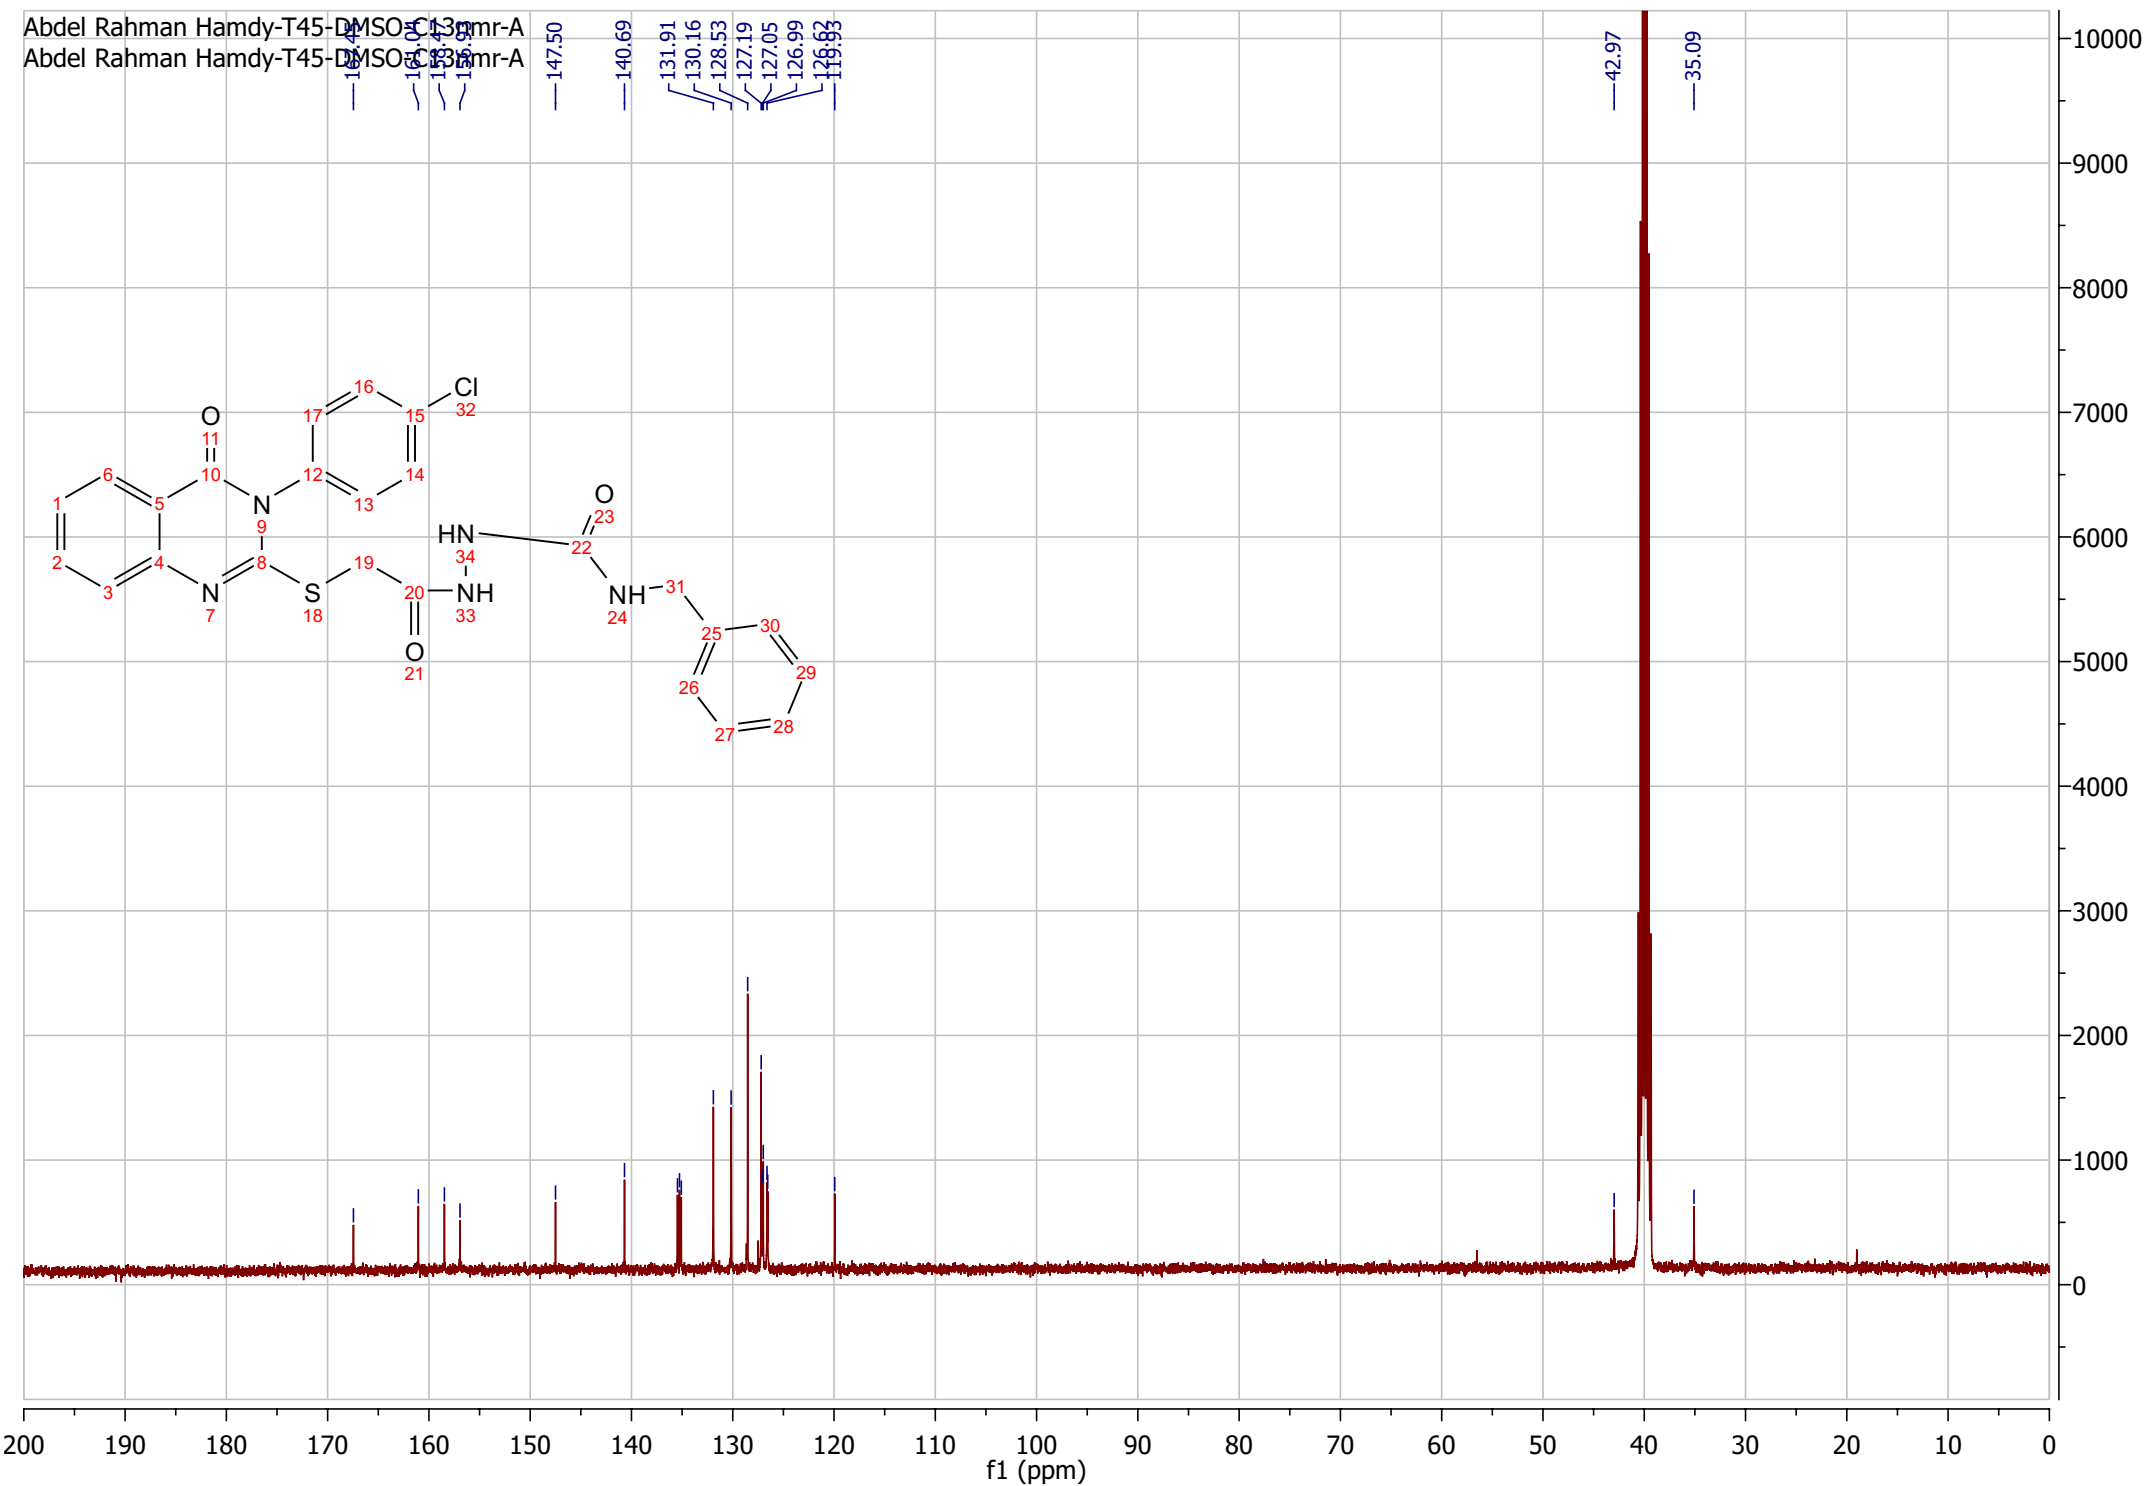

f1 (ppm)



Abdelrahman Hamdy-Tu11-C13-RR  
Abdelrahman Hamdy-Tu11-C13-RR

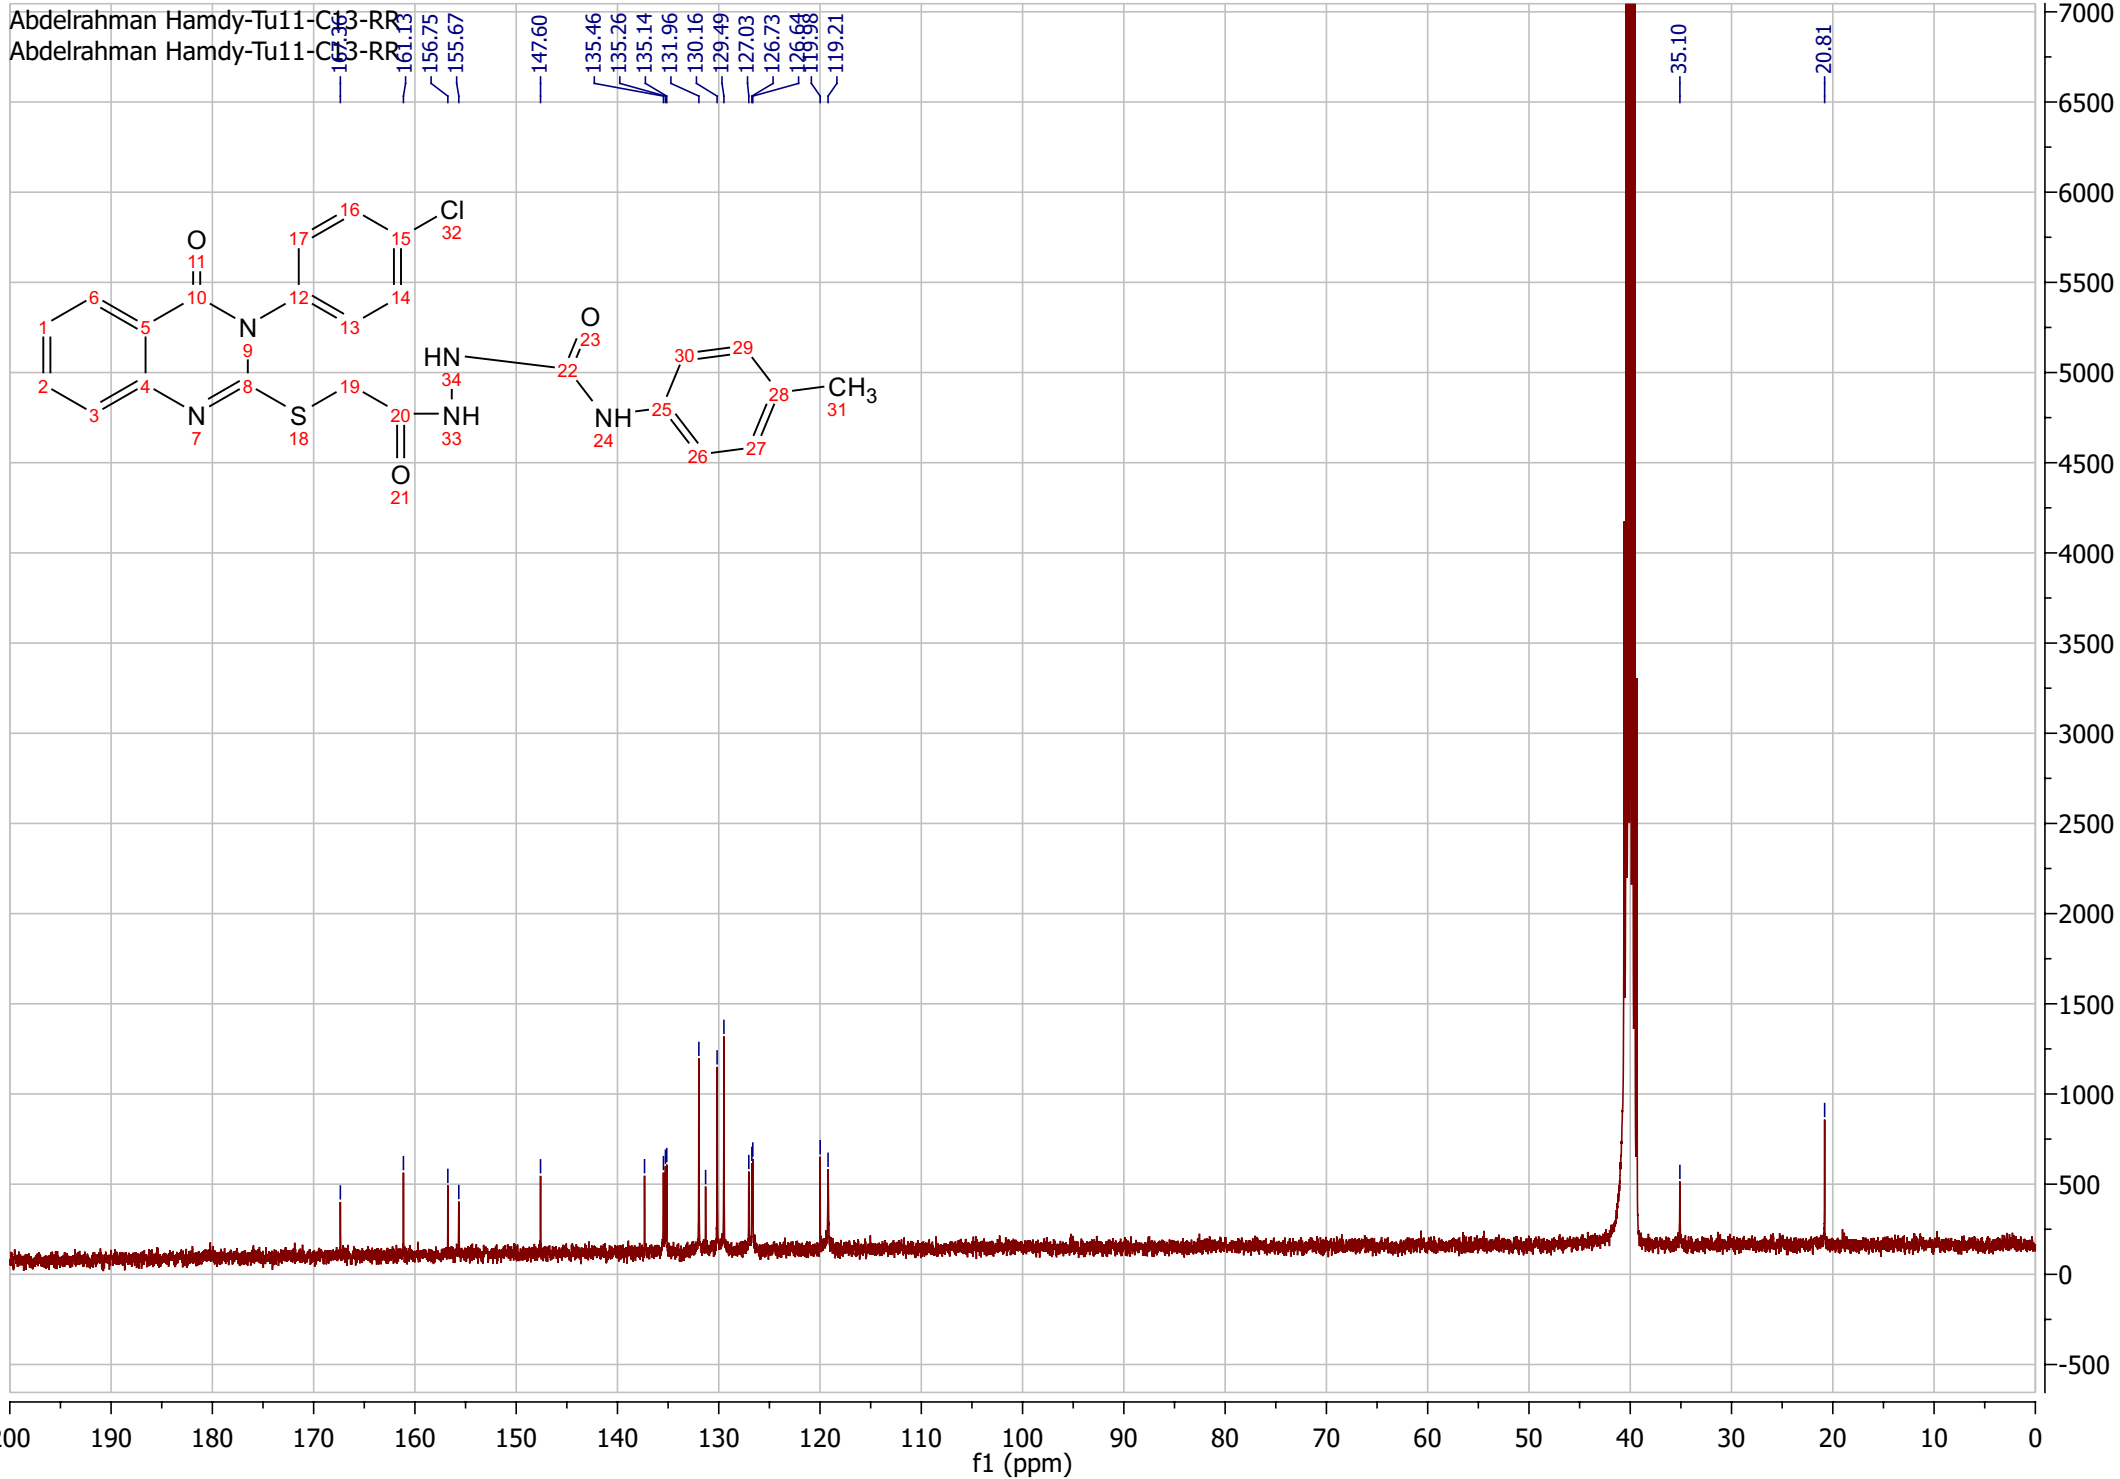

Abd elrahman hamdy- Tu12-6nmr-ow  
Abd elrahman hamdy- Tu12-6nmr-ow

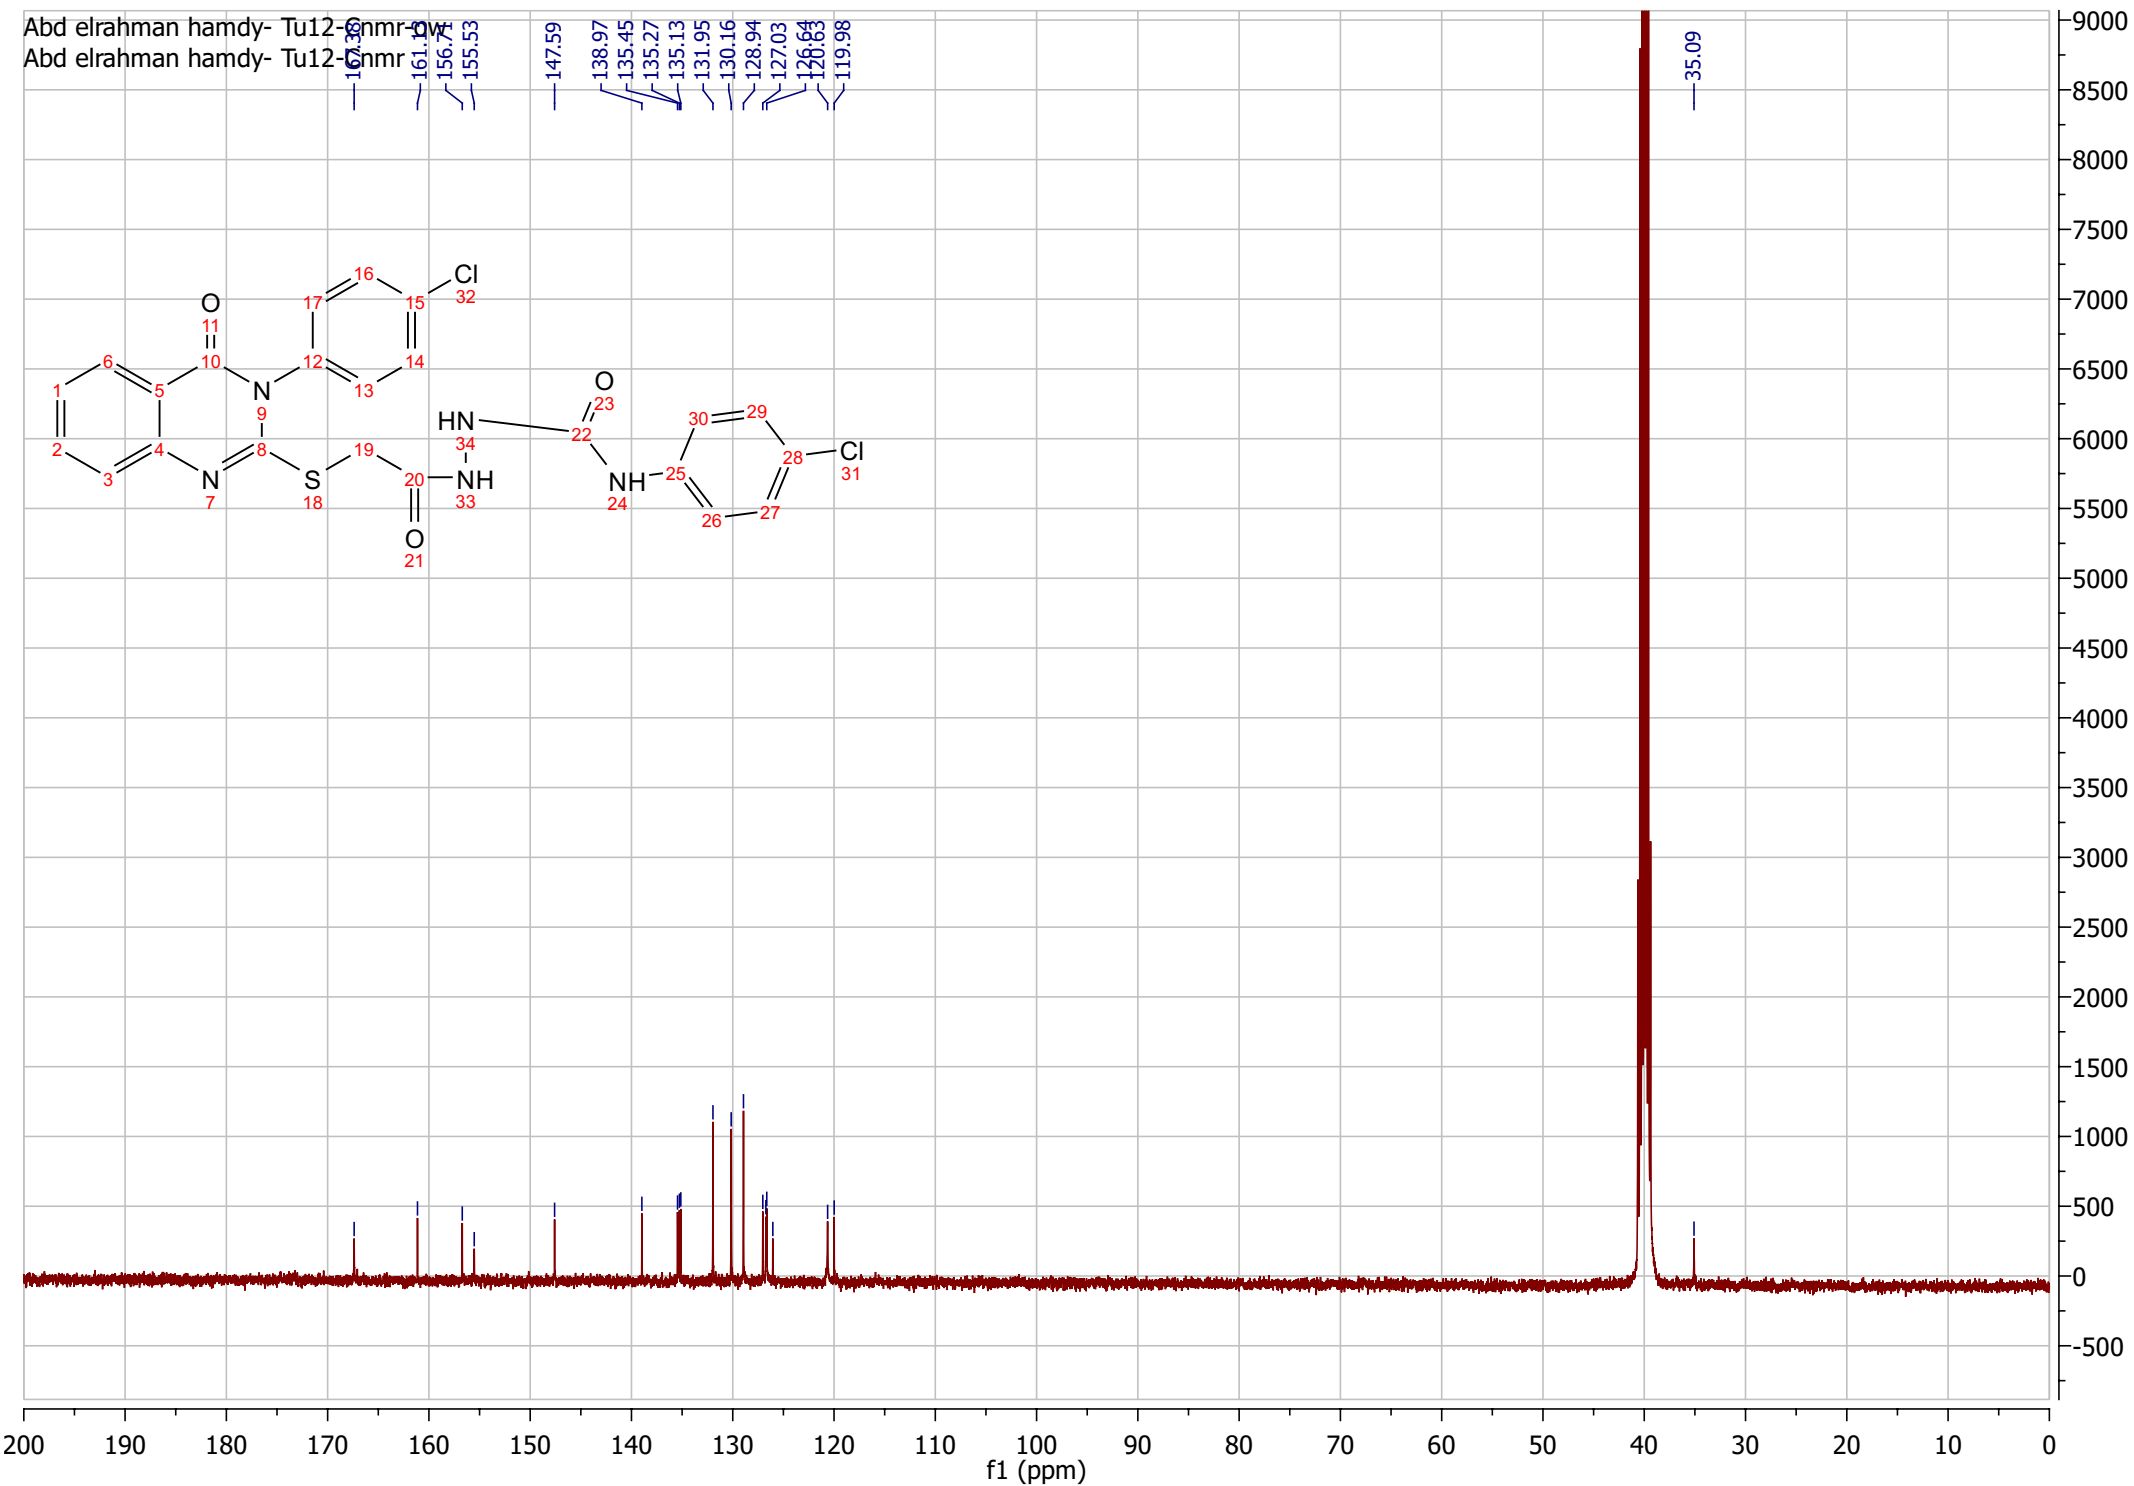

Abdelrahman Hamdi-M1-C13WH  
Abdelrahman Hamdi-M1-C13WH

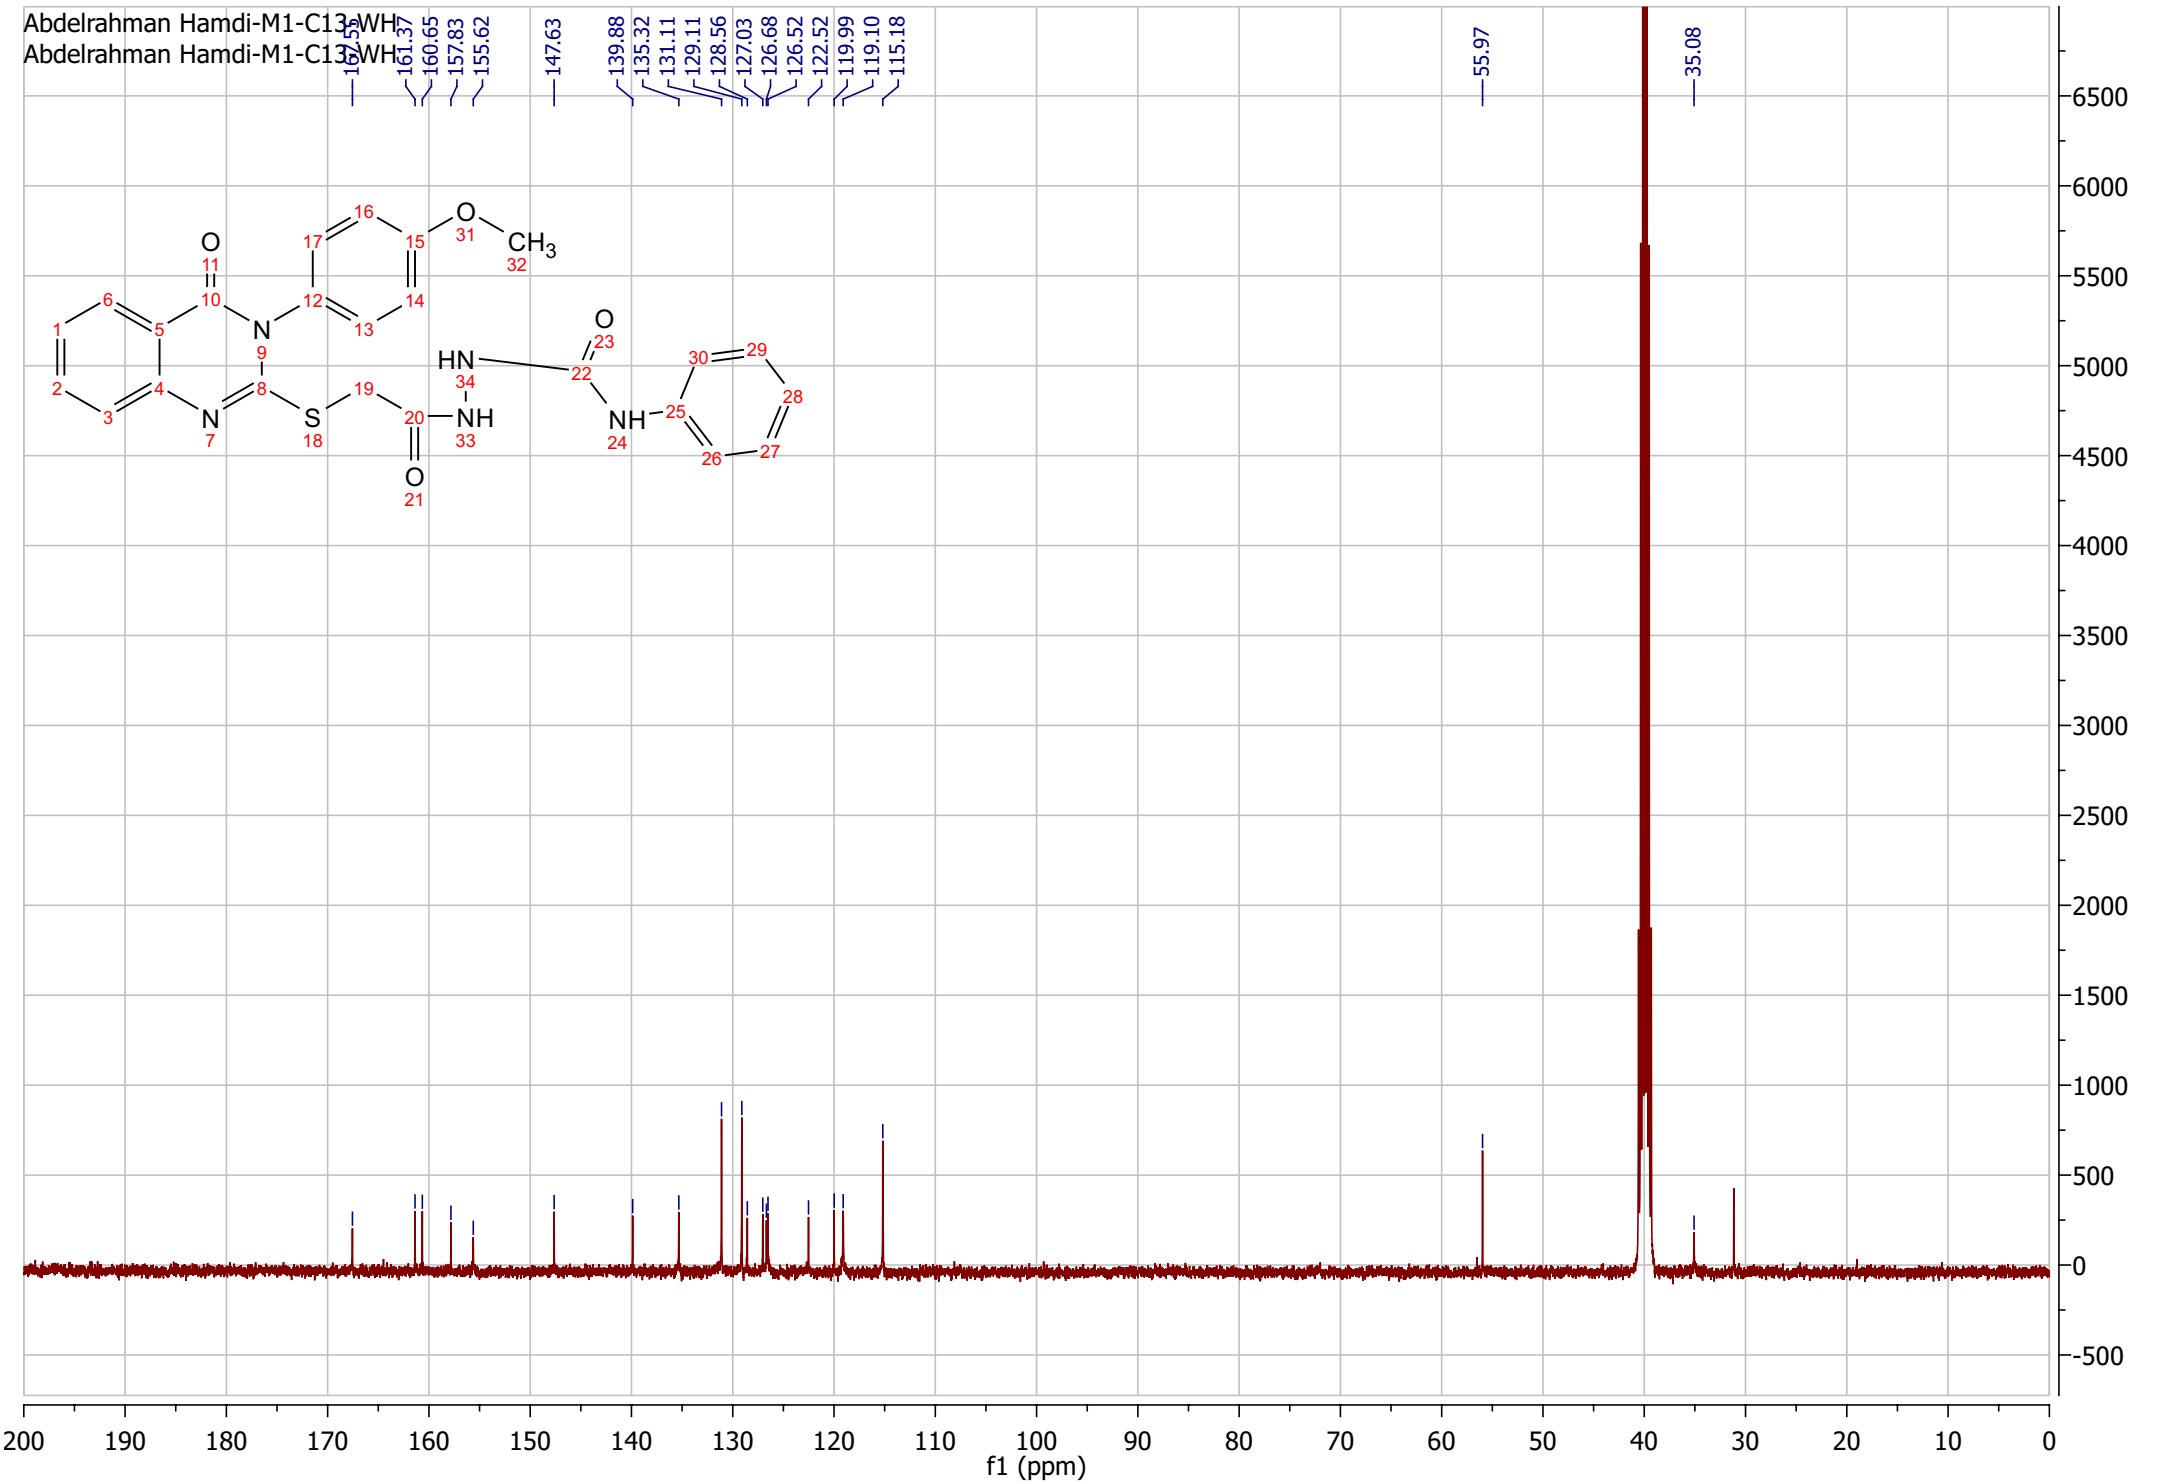

Abdelrahman Hamdi-M2-C13  
Abdelrahman Hamdi-M2-C13

165.57  
161.37  
160.66  
157.85  
155.87  
155.10  
147.63  
135.31  
132.87  
131.10  
128.57  
127.03  
126.66  
126.51  
121.04  
119.99  
115.19  
114.30

55.97  
55.64

35.12

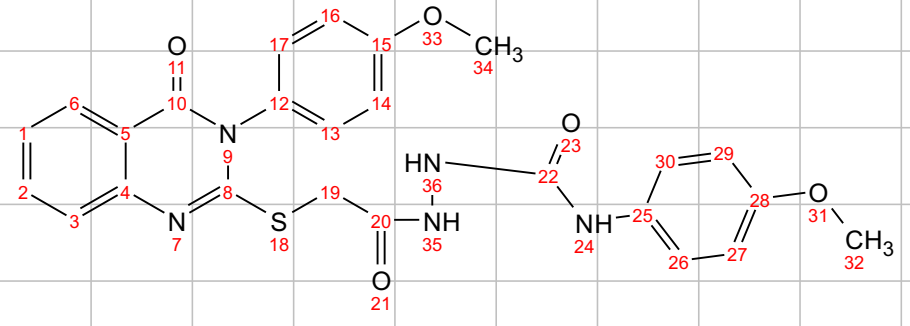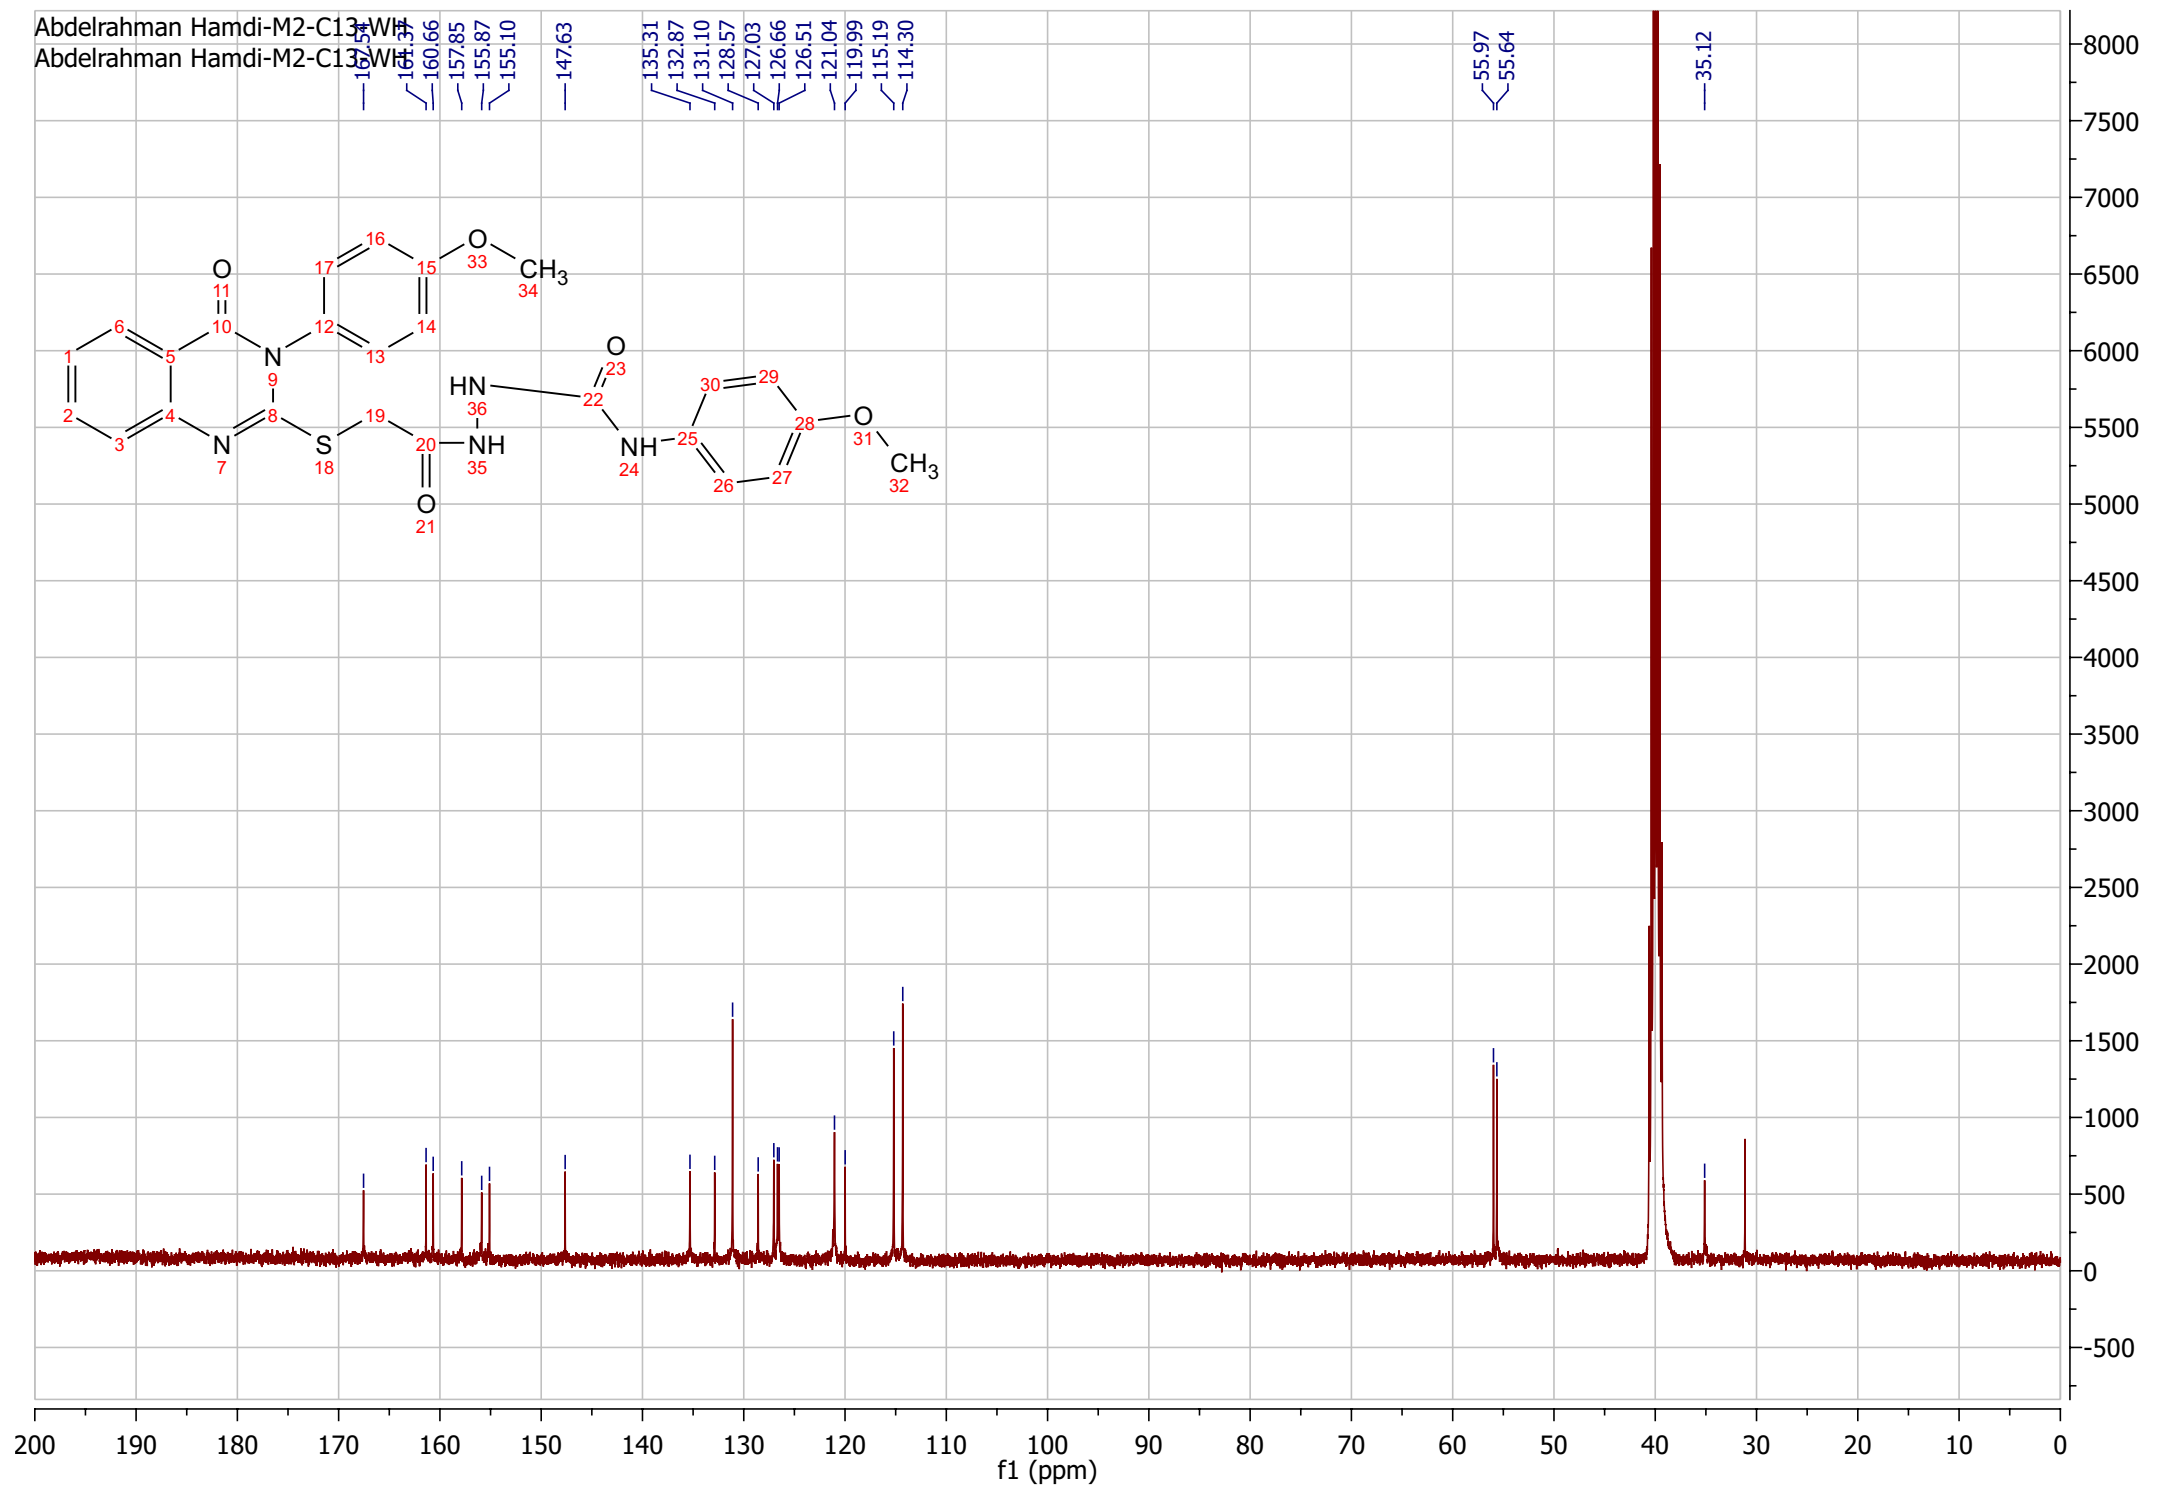

Abdelrahman Hamdi-M3-C13  
Abdelrahman Hamdi-M3-C13

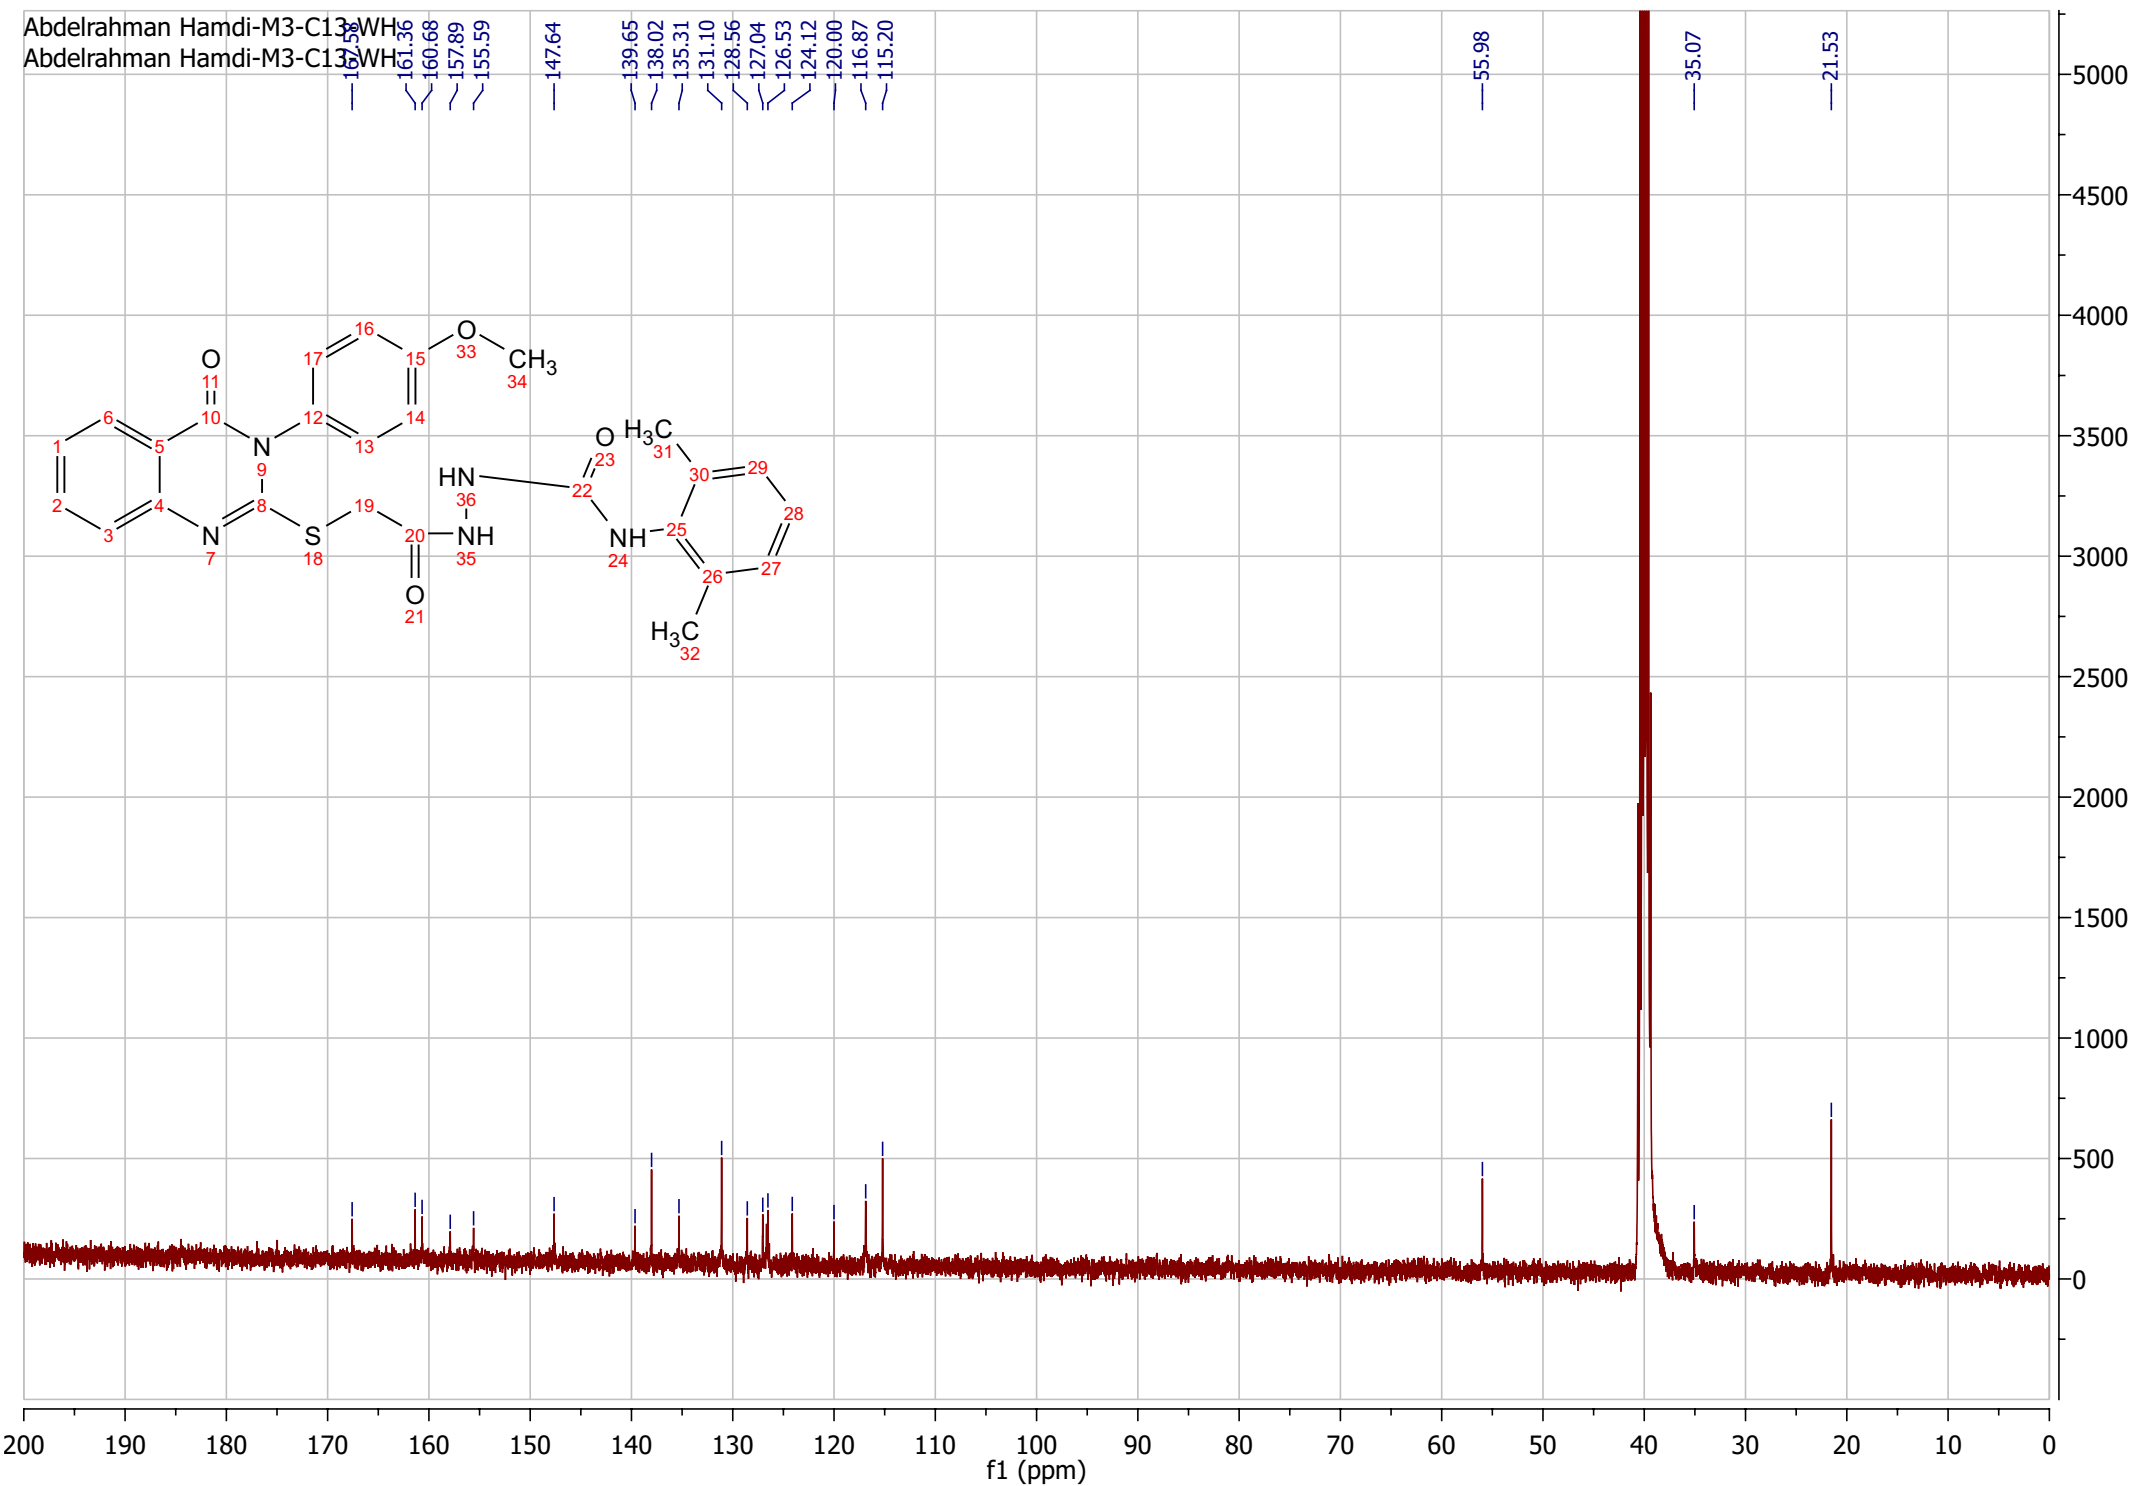

Abdelrahman Hamdi-M4-C13-WH  
Abdelrahman Hamdi-M4-C13-WH

165.57  
161.37  
160.65  
157.82  
155.76  
147.63  
136.24  
135.32  
131.11  
128.56  
127.03  
126.67  
126.52  
120.99  
119.98  
115.69  
115.47  
115.18

55.97

35.12

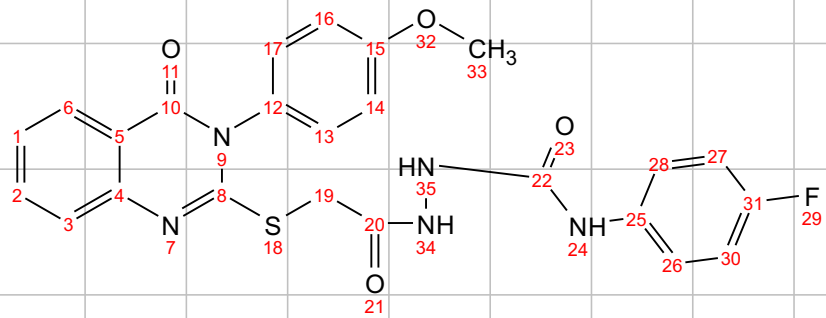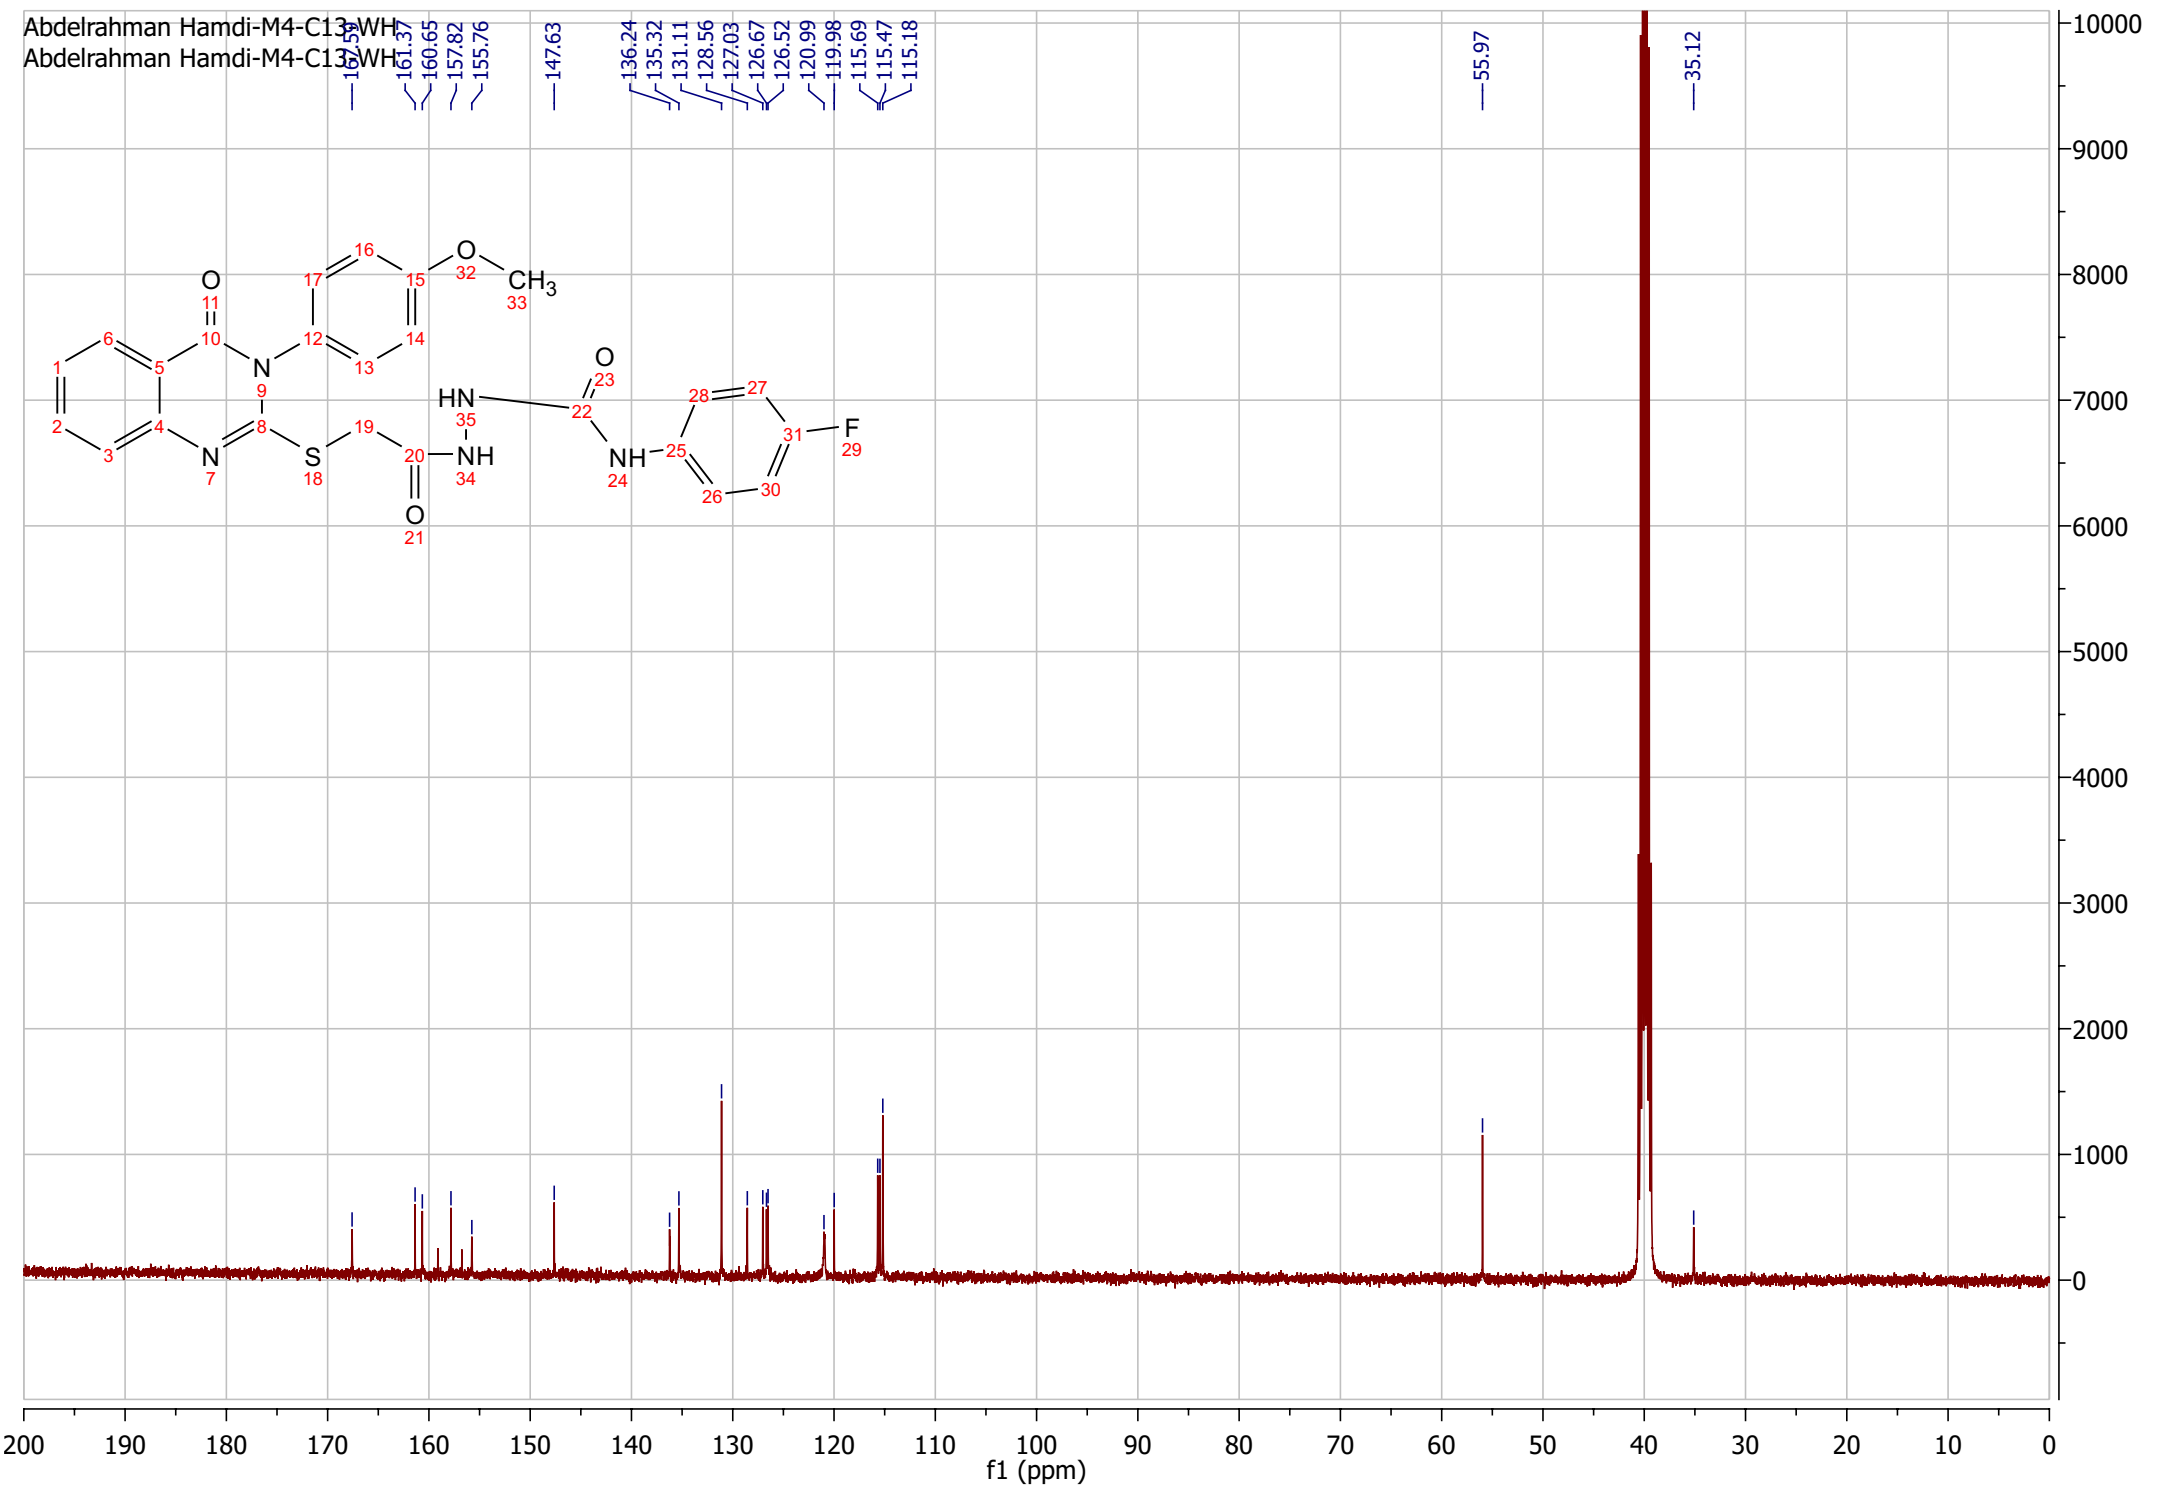

Abdelrahman Hamdi-M6-C13-WH  
Abdelrahman Hamdi-M6-C13-WH

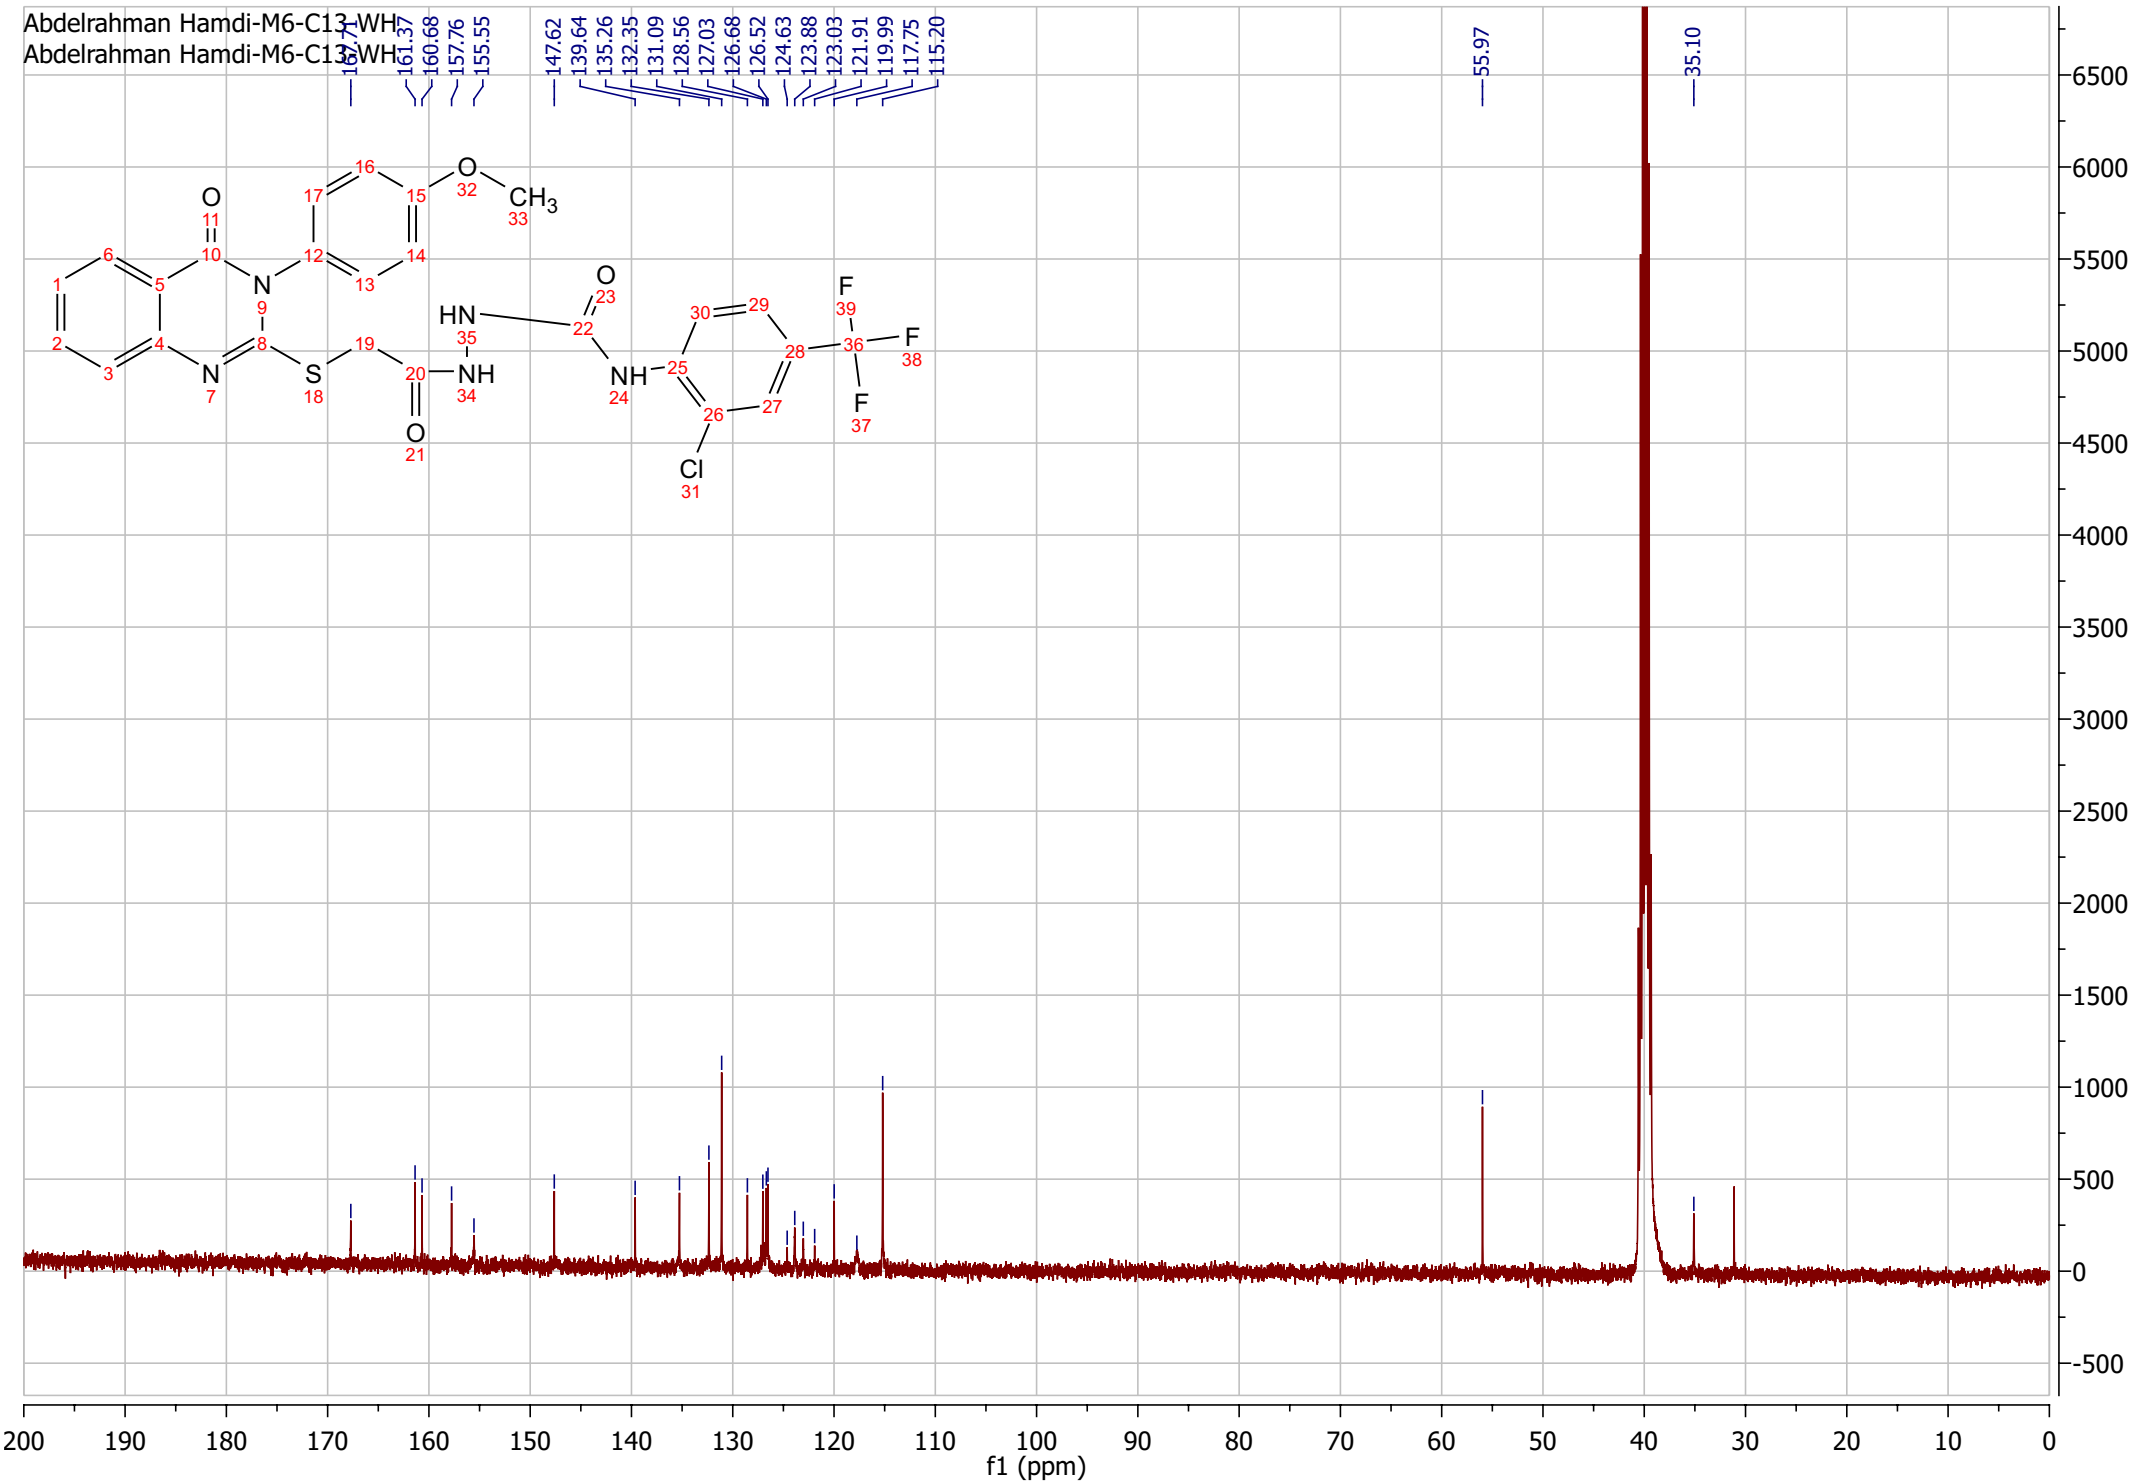

Abdelrahman Hamdi-M7-C13  
Abdelrahman Hamdi-M7-C13

167.54  
161.37  
160.65  
157.83  
155.69  
147.64  
137.29  
135.32  
131.10  
129.49  
129.38  
128.68  
128.56  
127.03  
126.67  
126.51  
119.22  
115.18

55.96

35.10

20.78

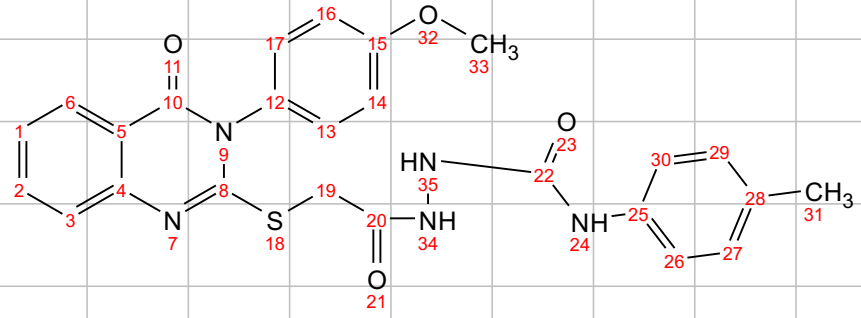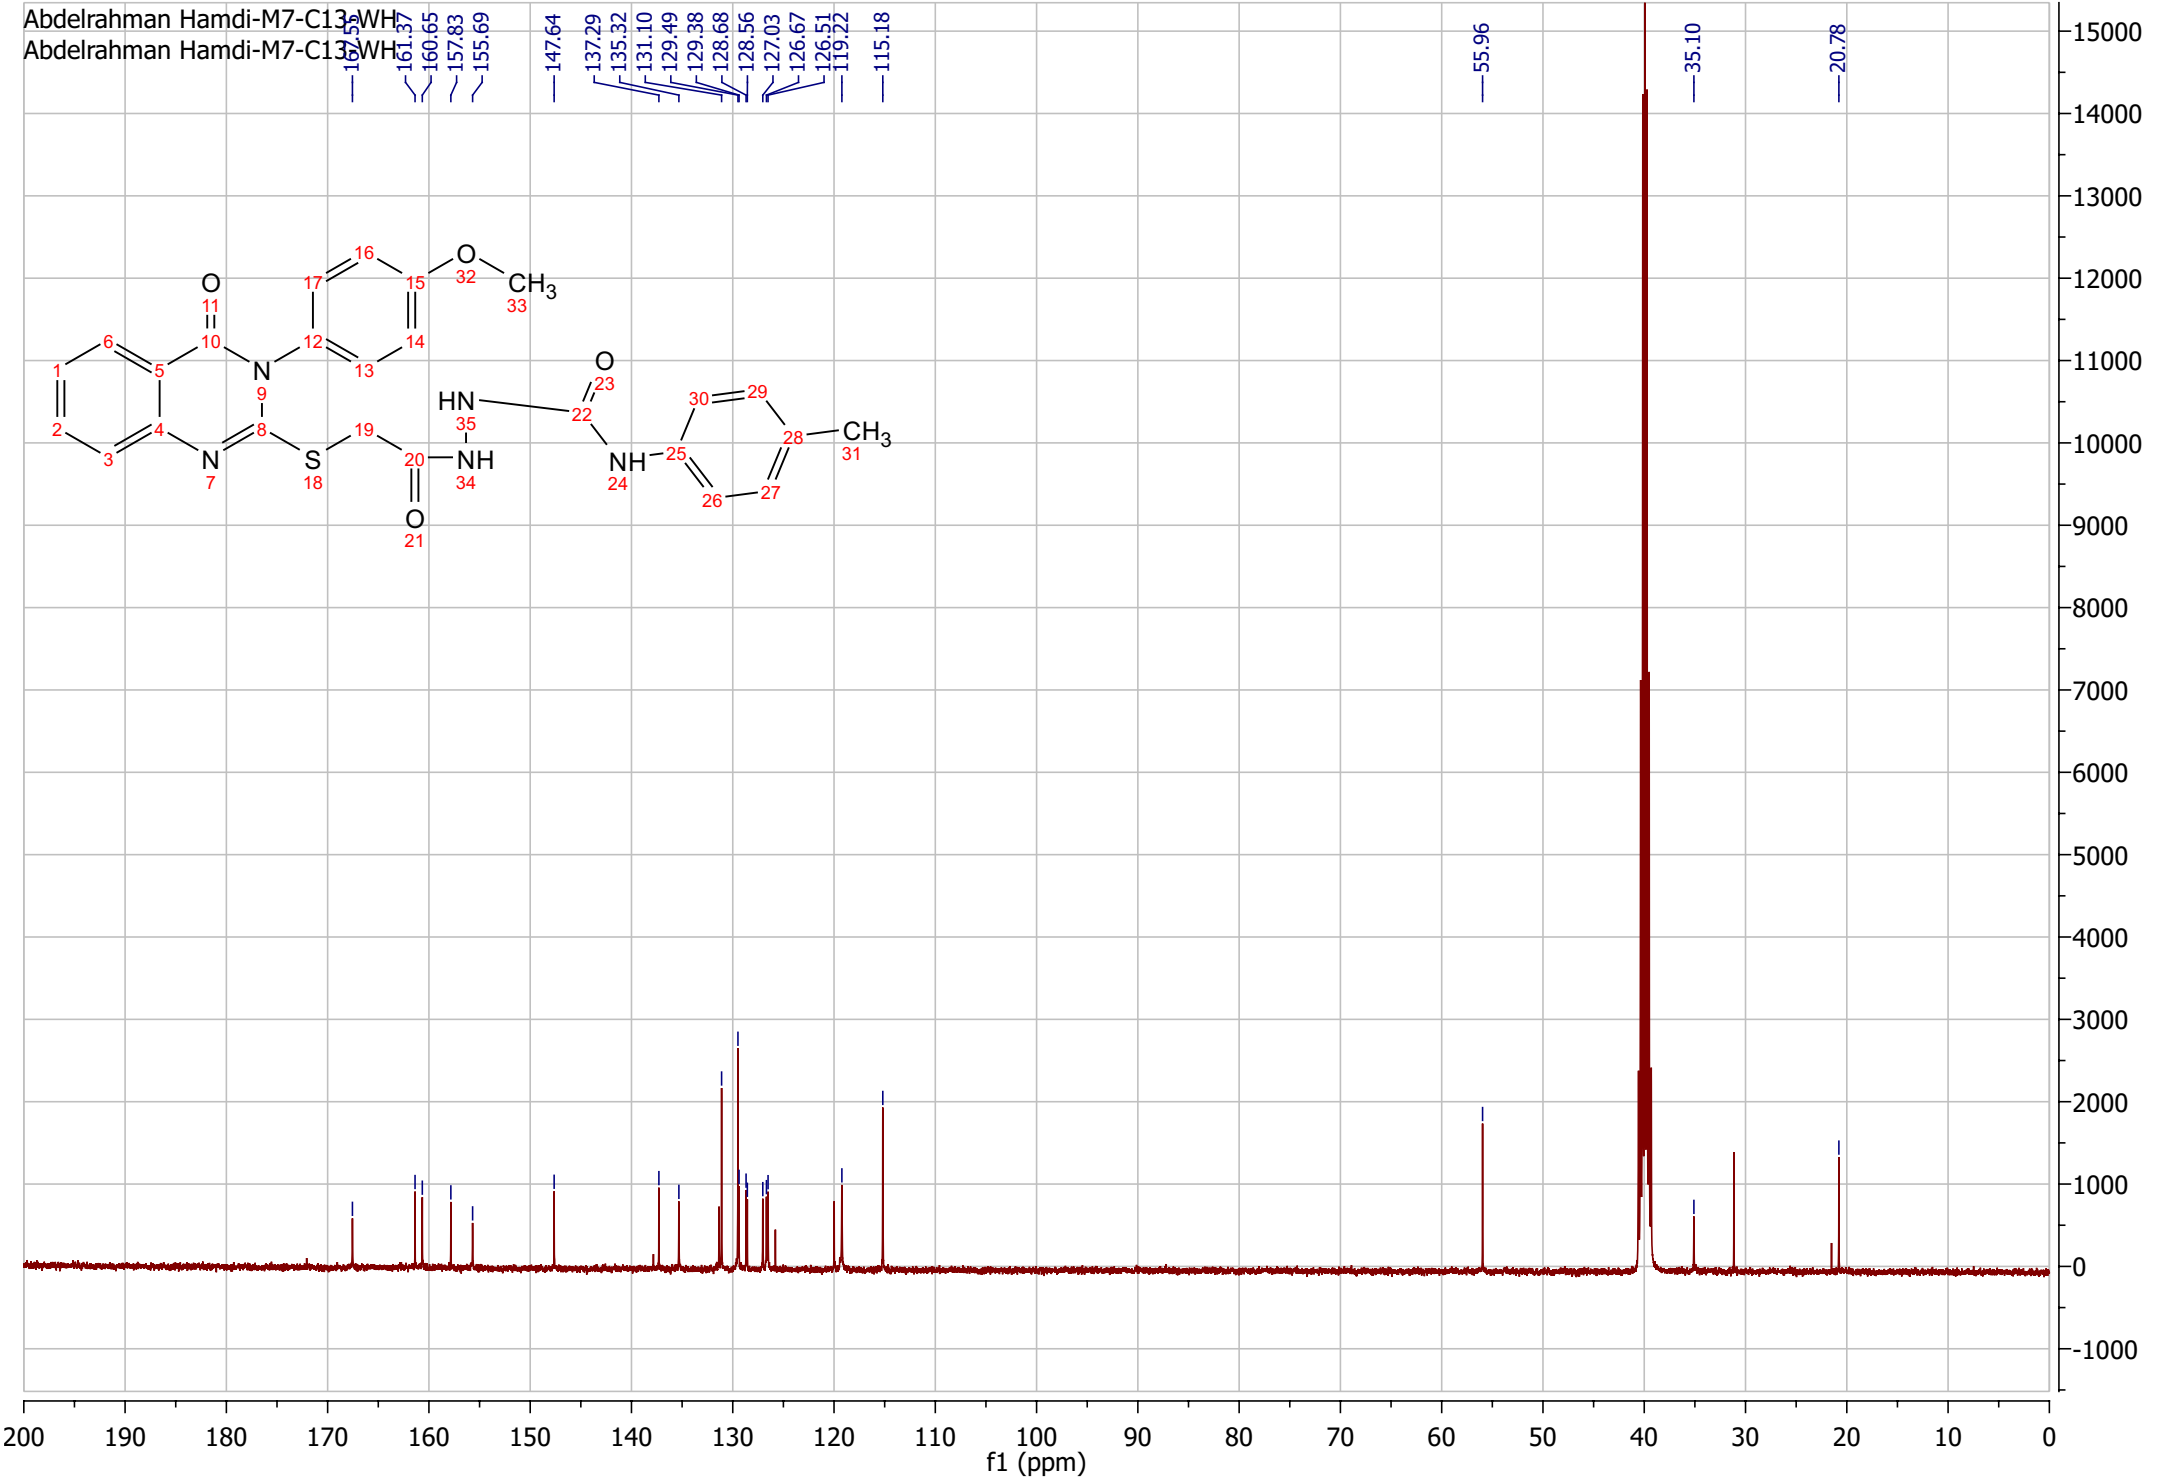



Abdelrahman Hamdi-M8-C13  
Abdelrahman Hamdi-M8-C13

161.63  
160.65  
157.80  
155.55  
147.63  
138.94  
135.33  
131.11  
128.94  
128.55  
127.03  
126.68  
126.52  
126.06  
120.65  
119.98  
115.18

55.97

35.10

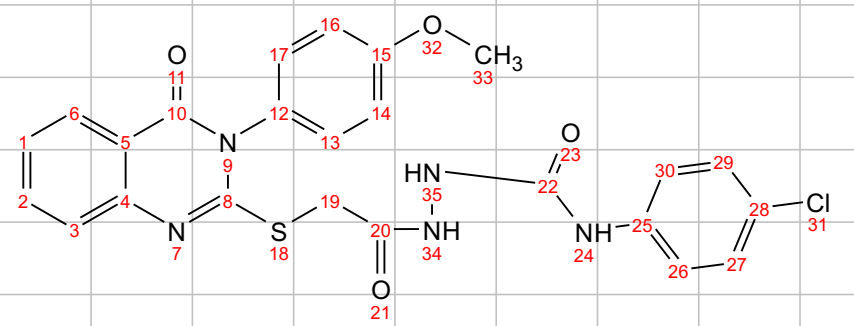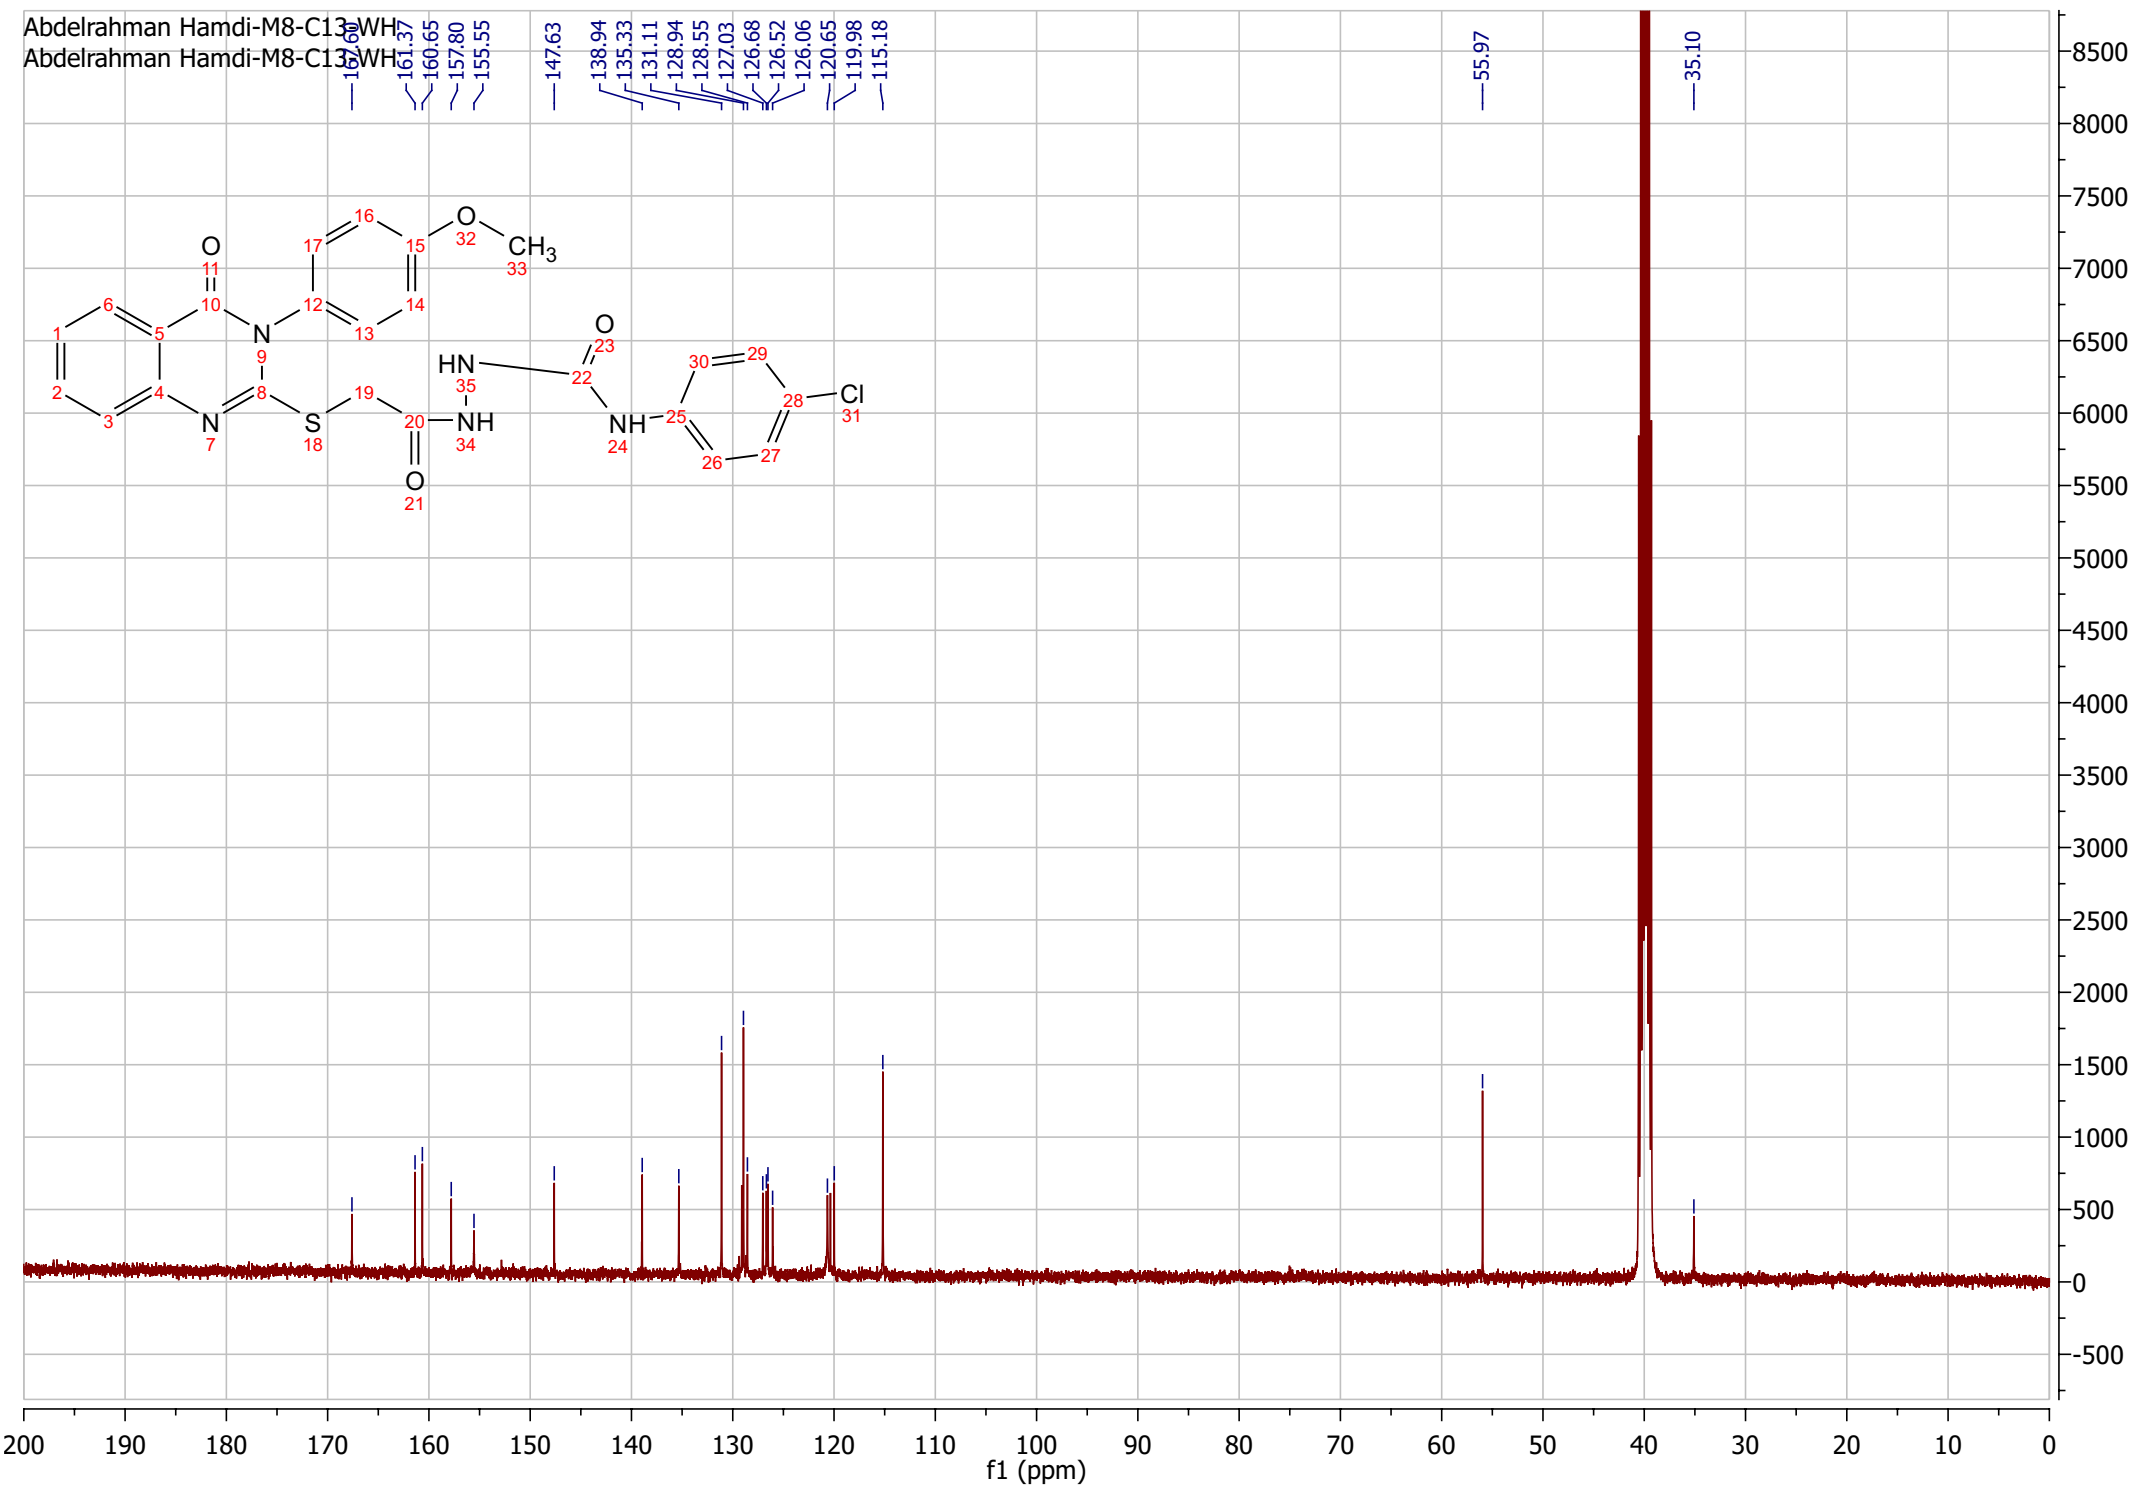

Supplement: RA-014-D4RA04828H-s002.pdf [file RA-014-D4RA04828H-s002.pdf]
